# Supplementary material for: Integrating field, textural and geochemical monitoring to track eruption triggers and dynamics: a case-study from Piton de la Fournaise
Source: Copernicus journal article supplement (doi:10.5194/se-2017-99), 2017-09-13
Supplement: Supplementary file [file se-2017-99-AC1-supplement.pdf]

1 **Integrating field, textural and geochemical monitoring to track eruption triggers and**  
2 **dynamics: a case-study from Piton de la Fournaise**

3

4 Lucia Gurioli<sup>(1)</sup>, Andrea Di Muro<sup>(2)</sup>, Ivan Vlastélic<sup>(1)</sup>, Séverine Moune<sup>(1)</sup>, [Simon Thivet<sup>\(1\)</sup>](#),  
5 [Marina Valer<sup>\(1\)</sup>](#), Nicolas Villeneuve<sup>(2)</sup>, ~~Patrick Bachèlery<sup>(4)</sup>~~, ~~Marina Valer<sup>(4)</sup>~~, ~~Simon Thivet<sup>(4)</sup>~~,  
6 Guillaume Boudoire<sup>(2,3)</sup>, Aline Peltier<sup>(2)</sup>, [Patrick Bachèlery<sup>\(1\)</sup>](#), Valerie Ferrazzini<sup>(2)</sup>, Nicole  
7 Métrich<sup>(2)</sup>, Mhammed Benbakkar<sup>(1)</sup>, Nicolas Cluzel<sup>(1)</sup>, Christophe Constantin<sup>(1)</sup>, Jean-Luc  
8 Devidal<sup>(1)</sup>, Claire Fonquernie<sup>(1)</sup>, Jean-Marc Hénot<sup>(1)</sup>

9 (1) Université Clermont Auvergne, CNRS, IRD, OPGC, Laboratoire Magmas et Volcans, F-63000  
10 Clermont-Ferrand, France

11 (2) Institut de Physique du Globe (IPGP), Sorbonne Paris-Cite, CNRS UMR-7154, Université Paris  
12 Diderot, Observatoire Volcanologique du Piton de la Fournaise (OVPF), Bourg Murat, France,

13 (3) Laboratoire Géosciences Réunion, Université de La Réunion, Institut de Physique du Globe de  
14 Paris, Sorbonne Paris-Cité, UMR 7154 CNRS, F-97715 Saint-Denis, France

15 Corresponding author: L Gurioli, Université Clermont Auvergne, CNRS, IRD, OPGC, LMV  
16 Campus Universitaire des Cézeaux 6 Avenue Blaise Pascal 63178 Aubière Cedex  
17 ([lucia.guriolica.fr](mailto:lucia.guriolica.fr))

18

19 **Abstract (250 words)**

20 The 2014 eruption at Piton de la Fournaise (PdF), la Reunion, which occurred after 41  
21 months of quiescence, began with surprisingly little precursory activity, and was one of the  
22 smallest so far observed at PdF in terms of duration (less than 2 days) and volume (less than  
23 0.4 Mm<sup>3</sup>). The pyroclastic material was composed of spiny-opaque, spiny-iridescent, and  
24 fluidal [basaltic](#) scoria along with golden [basaltic](#) pumice. Density analyses performed on 200  
25 lapilli reveal that the spiny-opaque clasts are the densest (1600 kg/m<sup>3</sup>) and richest in crystals  
26 ([55](#) vol%), and the golden pumices are the lightest (400 kg/m<sup>3</sup>) and poorest in crystals ([14-8](#)  
27 vol%). The connectivity data indicate that the fluidal and golden (Hawaiian-like) clasts have  
28 more isolated vesicles (up to 40%) than the spiny (Strombolian-like) clasts (0-5%). These  
29 textural variations are linked to primary pre-eruptive magma storage conditions. The golden  
30 and fluidal fragments track the hotter portion of the melt, in contrast to the spiny fragments  
31 [and lava which that](#) mirror the cooler portion of the shallow reservoir. [Exponential decrease of](#)

32 ~~the magma ascent and output rates corresponded to p~~Progressive tapping of these distinct  
33 portions ~~of the storage system. Increasing syn-eruptive degassing and melt-gas decoupling~~  
34 leads to a decrease in the explosive intensity from early fountaining to Strombolian activity.  
35 The geochemical results confirm the absence of new hot input of magma ~~into the 2014~~  
36 ~~reservoir~~ and confirm the ~~involvement-emission~~ of a single, shallow, differentiated magma  
37 source, possibly related to residual magma from the November 2009 eruption. ~~Fast volatile~~  
38 ~~exsolution and crystal-melt separation (second boiling) were triggered by deep pre-eruptive~~  
39 ~~magma transfer and stress field change. Our study highlights the possibility that shallow~~  
40 ~~magma pockets can be quickly reactivated by deep processes without mass or energy (heat)~~  
41 ~~transfer and produce hazardous eruptions with only short term elusive precursors. We found~~  
42 ~~that the eruption was triggered by water exsolution, favoured by the shallow depth of the~~  
43 ~~reservoir, rather than cooling and chemical evolution of the stored magma.~~

44  
45 **Key words** : Piton de La Fournaise, Hawaiian activity, Strombolian activity, shallow reservoir,   
46 texture, petrology, geochemistry

## 47 48 **1. Introduction**

49  
50 A detailed characterization and understanding of eruptive dynamics and of processes driving  
51 and modulating volcano unrest is crucial in monitoring active volcanoes and fundamental for  
52 forecasting volcanic eruptions (Sparks, 2003). Many studies suggest that eruptive phenomena  
53 are strongly dependent on the physico-chemical properties of ascending magma in the conduit  
54 (e.g., temperature, viscosity, porosity, and permeability) (e.g. Sparks, 1978; Rust and  
55 Cashman, 2011; Gonnermann and Manga, 2013; Polacci et al., 2014). Integrating  
56 petrographic, chemical and textural data can thus provide critical information to constrain  
57 both the pre-eruptive storage conditions, and the processes related to magma ascent, degassing  
58 and cooling (e.g., reference in Table 1 in Gurioli et al., 2015). This multidisciplinary approach  
59 is of even greater importance in the monitoring of volcanoes which emit relatively  
60 unchanging magma compositions over time, like basaltic volcanoes (e.g. Di Muro et al., 2014;  
61 Gurioli et al., 2015; Coppola et al., 2017). As a result, monitoring of textures, and  
62 petrochemical properties of lava fragments and pyroclasts is now routinely carried out on a  
63 daily basis at active volcanoes such as Kilauea, Etna, and Stromboli (e.g., Thornber et al.,  
64 2003; Polacci et al., 2006; Swanson et al., 2009; Taddeucci et al., 2002; Colo' et al., 2010;  
65 Houghton et al., 2011; 2013; 2016; Carey et al., 2012; 2013; Lautze et al., 2012; Andronico et

Mis en forme : Retrait : Première ligne  
: 0 cm

66 al., 2013a; b; 2014; Corsaro and and Miraglia, 2014; Di Muro et al., 2014; Eychienne et al.,  
67 2015; Gurioli et al.; 2014; Leduc et al., 2015; [Leibrandt and Le Pennec and Leibrandt](#), 2015;  
68 [and Kahl et al.](#), 2015). In the past, time series of petrographic and geochemical data have been  
69 measured for Piton de la Fournaise (PdF) basalts and particularly for effusive products. The  
70 aim of these datasets was to constrain ~~potential-time and space~~ magma evolution for one of  
71 the most active basaltic volcanoes of the world (e.g. Albarède et al., 1997; Vlastélic et al.,  
72 2005; 2007, 2009; Vlastélic and Pietruszka, 2016; Schiano et al., 2012; Boivin and Bachèlery,  
73 2009; Peltier et al., 2009; Lénat et al., 2012; Di Muro et al., 2014; 2015). However, this type  
74 of approach has seldom been coupled with detailed textural studies at PdF and instead has  
75 mostly focused on crystal textures and crystal size distribution (Welsch et al., 2009; 2013; Di  
76 Muro et al., 2014; 2015). Moreover, only sporadic data exist on the textures of pyroclasts  
77 ejected by the PdF (Villemant et al., 2009; Famin et al., 2009; Michon et al., 2013; Vlastélic  
78 et al., 2013; Welsch et al., 2009; 2013; Morandi et al., 2016; Di Muro et al., 2015; Ort et al.,  
79 2016).

81 Within this paper, we present a multidisciplinary textural, chemical and petrological  
82 approach to quantify and understand the short-lived 2014 PdF eruption. This approach  
83 combines detailed study of the pyroclastic deposit (grain\_size and componentry) with bulk  
84 texture analysis (density, vesicularity, connectivity, morphology, vesicle distribution and  
85 crystal content) and a petro-chemical study (bulk rock, glass, minerals, melt inclusions) of the  
86 same clasts. This integrated approach has now been formalized within the National  
87 Observation Service for Volcanology (SNOV) as routine observational systems (DynVolc),  
88 Dynamics of Volcanoes, (<http://wwwobs.univ-bpclermont.fr/SO/televolc/dynvolc/>) and  
89 GazVolc, Observation des gaz volcaniques, ~~\_\_\_\_\_~~ ([http://wwwobs.univ-](http://wwwobs.univ-bpclermont.fr/SO/televolc/gazvolc)  
90 [bpclermont.fr/SO/televolc/gazvolc](http://wwwobs.univ-bpclermont.fr/SO/televolc/gazvolc)) to provide data for the on-going activity at PdF (Harris et  
91 al., 2017).

92 In spite of being the first of a series of eruptions, the June 2014 event was preceded by  
93 only weak inflation and by a rapid increase in number of shallow (< 2 km below volcano  
94 summit) volcano tectonic earthquakes that happened only 11 days before the eruption (Peltier  
95 et al., 2016). The eruptive event was dominantly effusive, lasted only 20 hours and emitted a  
96 very small volume of magma (ca. 0.4 Mm<sup>3</sup>, Peltier et al., 2016), which makes this event one  
97 of the smallest, in terms of duration and volume, observed at PdF up to now. In addition, the  
98 eruption started during the night and very little direct observation exists for the first few hours  
99 of the activity, when the lava effusion was associated with very weak fountaining activity and

Mis en forme : Retrait : Première ligne  
: 1,25 cm

100 Strombolian explosions.

101 This eruption occurred just outside the southern border of the summit Dolomieu  
102 caldera, at the top of the central cone of PdF (Fig. 1). This is a high risk sector because of the  
103 high number of tourists. Identification of precursors of this kind of activity represents an  
104 important challenge for monitoring systems (Bachelery et al., 2016).

105 Therefore this eruption represents an ideal context to apply our multidisciplinary  
106 approach, with the aim of addressing the following key questions:

107 (i) why was such a small volume of magma erupted instead of ~~forming an~~  
108 ~~intrusion remaining intruded~~?

109 (ii) what caused the rapid trigger and the sudden end to this small volume  
110 eruption?

111 (iii) which was the source of the eruption (shallow versus deep, single versus  
112 multiple small magma batches)?

113 (iv) what was the ascent and degassing history of the magma?

114 ~~(iii)~~(v) what was the time and space evolution of the eruptive event?

115 Furthermore, this eruption provides an exceptional opportunity to study processes leading to  
116 the transition from mild Hawaiian (<20 m high fountains, following the nomenclature  
117 proposed by Stovall et al., 2011) to Strombolian activity (<10 m high), whose products are  
118 little modified by post-fragmentation processes because of the very low intensity of the  
119 activity.

120 ~~Finally, with these results we want to stress how combined textural and petro-chemical~~  
121 ~~quantification of the eruptive products can be used to characterize on going activity, and to~~  
122 ~~provide valuable information to understand both the causes and the dynamics of potentially~~  
123 ~~harmful eruptions.~~

124

## 125 2 The 2014 activity

### 126 2.1 Precursory activity

127 The 20 June 2014 summit eruption represents the first eruption at PdF after 41 months of  
128 quiescence. The last ~~previous~~ eruption had been on 9 December 2010, with a shallow (above  
129 sea level) intrusion on 2 February 2011 (Roult et al., 2012). From 2011, the deformation at  
130 PdF was constant with two distinct types of behaviour: (i) a summit contraction of a few  
131 centimetres every year (Fig. 1d); (ii) a preferential displacement of the east flank at a rate of  
132 1-3 centimetres per year (Brenquier et al., 2012; Staudacher and Peltier, 2015). The

133 background microseismicity was very low (< 5 shallow events/day below volcano summit)  
134 and low-temperature summit intracaldera fumaroles emitted very little sulphur (H<sub>2</sub>S or SO<sub>2</sub>)  
135 and carbon (CO<sub>2</sub>) (Di Muro et al., ~~2012~~; 2016). After 41 months of rest, a new intense cycle  
136 of activity (June 2014, February 2015, May 2015, July 2015, August-October 2015; May  
137 2016; September 2016; January 2017 and ~~the on-going eruption that had started the 14 of July~~  
138 2017) began with surprisingly little and ambiguous precursory activity.

139 The 2014 summit eruption started during the night of June 20/21, at 21h35 GMT  
140 (0h35 local time) and ended on June 21 at 17h09 GMT (21h09 local time), after less than 20  
141 hours of dominantly effusive activity. The volcano reawakening was preceded, in March and  
142 April 2014, by deep (15-20 km below sea level) eccentric seismicity and increase in soil CO<sub>2</sub>  
143 flux below the western volcano flank, 15 km NW of the volcano summit (Liuzzo et al., 2015;  
144 Boudoire et al., 2017). Background microseismicity and inflation of the central cone increased  
145 progressively starting on 9 June 2014. Weak inflation recorded on both distal and summit  
146 baselines (Fig. 1d) suggest that deep (below sea level) magma up-rise was pressurizing the  
147 shallow (above sea level) magma storage system (Peltier et al., 2016). On June 13, 17 and 20,  
148 three shallow (hypocentres located above sea level) intense seismic crises occurred below the  
149 summit Dolomieu caldera (Fig. 1), with hundreds of events located in a narrow depth range  
150 between 1100 and 2100 metres below the volcano summit. These seismic crises consisted of  
151 swarms of low magnitude (M: 1-2) volcano tectonic events which increased in number from  
152 the first to the third crisis. On June 20, seismicity increased progressively and a final seismic  
153 crisis started at 20h20 GMT, only 75 minutes before the eruption. This last seismic crisis was  
154 coupled with acceleration in the deformation of the summit area, which began only 60  
155 minutes before the eruption. Interestingly, only slight inflation of the central cone (< 2 cm of  
156 dilatation) was detected 11 days before the 2014 eruption with a maximum of 1 cm and 1.6  
157 cm enlargement at the summit and the base of the cone, respectively (Peltier et al., 2016). A  
158 moderate increase in CO<sub>2</sub> and H<sub>2</sub>S emissions from summit intracaldera fumaroles was  
159 detected starting on June 2, but only very minor SO<sub>2</sub> emissions occurred before the eruption  
160 (mostly on June 7 and 15, unpublished data). Therefore, the increase-acceleration in both  
161 geophysical and geochemical parameters was mostly related to the late phase of injection of  
162 the dyke towards the surface just before the eruption. Following the end of the June 20-21  
163 eruption, a long-term continuous inflation of the edifice began, at a moderate rate, and mostly  
164 at the base of the volcano. More than one year after this first eruption, the long-term  
165 deformation trends showed that the 2014 eruption marked a kink between the deflation trend

166 which followed the caldera-forming 2007 eruption (Staudacher et al., 2009) and the currently  
167 ongoing continuous inflation trend ([Fig. 1d](#), and Peltier et al., 2016; Coppola et al., 2017).

168

## 169 **2.2 Chronology of the events and sampling strategies**

170 We reconstructed the chronology of events by combining a distribution map of the fissures,  
171 pyroclastic deposits and lava flows (Fig. 1) with a review of available images (visible and IR)  
172 and videos extracted from the observatory data base, the local newspapers, and web sites (Fig.  
173 2). The 2014 eruption occurred at the summit and on the SE slopes (Figs. 2a and 2b) of the  
174 central cone and evolved quickly and continuously over 20 hours. The full set of fractures  
175 opened during a short period of time (minutes) and emitted short (<1.7 km long) lava flows  
176 (Fig. 1 and Figs. 2c and 2d). Feeding vents were scattered along a 0.6 km long fissure set (Fig.  
177 1) and produced very weak (low) Hawaiian to Strombolian activity (Fig. 2).

178 Fissures opened from west to east, initially sub-parallel to the southern border of  
179 Dolomieu caldera and then propagated at lower altitude (Fig. 1). The summit part of the  
180 fractures (ca. 2500 m asl, Western Fracture, Fig. 1) emitted only small volumes of lava and  
181 pyroclasts. This part of the fracture set was active only during the first few hours of the  
182 eruption, at night. The eastern part of the fractures (Upper Fracture, Fig. 1) descended to  
183 lower altitude (between 2400 and 2300 m asl, Middle Fracture, Fig. 1) along the SE flank of  
184 the summit cone and emitted most of the erupted volume ([Figs. 2a and 2b](#)). As often observed  
185 in PdF eruptions, the activity progressively focused on a narrow portion of the fractures at low  
186 altitude and finally on a single vent located at the lower tip of the fracture system (Main Vent,  
187 at 2336 m asl, Figs. 1, 2). The first in situ observations in the morning of June 21 (ca. 04h00  
188 GMT) showed that weak Strombolian activity ([Figs. 2a and 2b](#)) was focused on a narrow  
189 segment of the lower fractures and that a'a lavas had already attained the elevation of 1983 m  
190 asl (0.2 km before maximum runout, [Fig. 2c](#)). A small, weak gas plume was also blowing  
191 northwards. A single sample of partially molten lava was collected from the still active lava  
192 front and partially water quenched ([Reu140621-1, Table S1, Fig. 2d](#)). During most of June 21,  
193 the activity consisted of lava effusion in three parallel lava streams ([Fig. 2c](#)) merging in a  
194 single lava flow ([Fig. 2e](#)) and mild-weak "Strombolian" explosions at several closely spaced  
195 spots along the lower part of the feeding fracture. At 13.00 (GMT), only weak explosions  
196 were observed within a single small spatter cone (Figs. [2fe](#) and [2gf](#)). Most of the lava field  
197 was formed of open channel a'a lavas. The total volume of lava was estimated by MIROVA  
198 service (<https://www.sites.google.com/site/mirovaweb/home>), with the use of the MODIS

199 images and the analyses of the flux from the spectral properties, to be within 0.34 (+/- 0.12)  
200 million m<sup>3</sup> (Mm<sup>3</sup>), (Coppola et al., 2017). Satellite derived volume estimates are consistent  
201 with independent photogrammetric estimates ( $0.4 \pm 0.2$  Mm<sup>3</sup>; Peltier et al., 2016) and rank the  
202 2014 eruption at the lower end of the volume range typically emitted by Piton de la Fournaise  
203 (Roult et al., 2012).

~~204        Apart from the sample from the front of the still active lava flow, all other samples  
205 were collected in two phases: 3 days after the eruption (pyroclasts on June 24, Fig. 3a; lavas  
206 on July 2) and three months later (pyroclasts from the Main Vent; November 18) (Table S1).  
207 June 24 samples were collected both from the main fractures, the Main Vent and the active  
208 lava flow (Fig. 1 and Table S1). Scattered scoriaceous bombs and lapilli were collected from  
209 the discontinuous deposits emplaced close to the Western Fracture, active only at the  
210 beginning of the eruptive event (Figs. 3c and 3d). In contrast, the sustained and slightly more  
211 energetic activity at the lower tip of the fractures built a small spatter cone and accumulated a  
212 small volume of inversely graded scoria fallout. This deposit is 10 cm thick at 2 m from the  
213 vent and covers an area of about 1000 m<sup>2</sup> (Main Vent, Fig. 1). For this fall deposit we  
214 collected two bulk samples, one from the base (within the lower 5 cm) and the other from the  
215 top (within the upper 5 cm), for the grain size and componentry analyses. The sample at the  
216 base was collected in November because on June 24 the loose proximal lapilli blanket was  
217 still very hot (405 °C; thermocouple measurement, Fig. 3a) and fumaroles with outlet  
218 temperatures in the range 305–60 °C were observed all along the fractures several weeks after  
219 the eruption. Both in June and in October, more than 200 clasts of similar size (maximum  
220 diameter between 16 and 32 mm, see Gurioli et al. 2015) were collected, both close to the  
221 Main Vent and in the ‘distal’ area (30 metres away from the vent) for density, connectivity,  
222 permeability, petrological and geochemical analysis.~~

223

### 224 **3. Methodology**

#### 225 **3.1 Sampling strategy**

226 Apart from the sample from the front of the still active lava flow (Fig. 2d), all other samples  
227 were collected in two phases: 3 days after the eruption (pyroclasts on June 24, Fig. 3a; lavas  
228 on July 2) and three months later (pyroclasts from the Main Vent, on November 18) (Table  
229 S1). June 24 samples were collected both from the main fractures (WF and UF, Fig. 1a), the  
230 Main Vent and the active lava flow (Fig. 1 and Table S1). Twenty five scoriaceous bombs and  
231 lapilli (Reu140624-9a-1 to Reu140624-9a and Reu140624-9b-6 to Reu140624-9b-25, in Table

232 [S3](#)) were collected from the discontinuous deposit (Fig. 3d) emplaced at the Western Fracture  
233 site (Fig. 1a), active only at the beginning of the eruptive event. Because of the short duration  
234 of the activity at the WF, the scoria fragments on the ground were scarce (Fig. 3c). The  
235 strategy was to collect a sample that was formed by the largest available number of clasts that  
236 was representative of this discrete deposit (Reu140624-9 in Table S1). From the Upper  
237 fracture (UP in Fig. 1a) only one big scoria was collected (Reu140624-13, Table S1) that  
238 broke in five parts, allowing us to measure its vesiculated core and the dense quenched  
239 external part (Reu140624-13-a to Reu140624-13-e, in Table S3). In contrast, the sustained  
240 and slightly more energetic activity at the lower tip of the fractures built a small spatter cone  
241 (Fig. 2) and accumulated a small volume continuous deposit (Fig. 3a) of inversely graded  
242 scoria fallout (Figs. 3b). This deposit is 10 cm thick at 2 m from the vent and covers an area  
243 of about ~1000 m<sup>2</sup> (Main Vent, Fig. 1). For this fall deposit we collected two bulk samples,  
244 one from the base (within the lower 5 cm, Reu141118-6 in Table S1) and the other from the  
245 top (within the upper 5 cm, Reu140624-3, in Table S1), for the grain size and componentry  
246 analyses. The sample at the base was collected in November because on June 24 the loose  
247 proximal lapilli blanket was still very hot (405 °C; thermocouple measurement, Fig. 3a) and  
248 fumaroles with outlet temperatures in the range 305-60 °C were ~~observed~~ sampled all along  
249 the fractures several weeks after the eruption (Fig. 1b and Table 1). These latter ~~geochemical~~  
250 data are not presented in this paper. We selected 103 fragments from the coarse grained bulk  
251 deposit at the top of the Main Vent (Reu140624-3-1 to Reu140624-3-103, in Table S3) for  
252 density, connectivity, permeability, petrological and geochemical analysis. In addition, in  
253 November 2014, more than 200 clasts (comprising in the Reu141118-1 to Reu141118-5  
254 samples, Table S1) of similar size (maximum diameter between 16 and 32 mm, see Gurioli et  
255 al., 2015) were collected, both close to the Main Vent and in the ‘distal’ area (30 metres away  
256 from the vent) to complete the particle bulk texture analyses and the chemical analyses.

### 257 **3.2.1 Grain size, componentry and ash morphology**

258 We performed grain size analyses on the two bulk samples collected from the Main Vent,  
259 following the procedure of Jordan et al. (2015) (Table S2). The samples were dried in the  
260 oven at 90°C and sieved at ½ phi intervals in the range of -5 φ to 4 φ (Fig. 3c); the data are  
261 also shown in full phi for comparison with the deposits of the 2010 PdF fountaining episode  
262 (Hibert et al., 2015; Fig. 3f). Sieving was carried out by hand and for not longer than three  
263 minutes to avoid breaking and abrasion of the very vesicular and fragile clasts. For the  
264 scattered scoria sampled from the Western Fracture (Figs. 1, [3de](#) and [3ed](#)), we followed the



265 grain size strategy proposed in Gurioli et al. (2013). Within this procedure we sampled each  
266 fragment and we recorded the weight and the three main axes (a being the largest, b, and c).  
267 To allow comparison with the sieving grain size analyses (Inman, 1952), we used the  
268 intermediate b axis dimension to obtain  $\phi = -\log_2 b$ .

269 Following the nomenclature of White and Houghton (2006) the componentry analysis  
270 is the subdivision of the sample into three broad components: i) juvenile, ii) non-juvenile  
271 particles, and iii) composite clasts. The juvenile components are vesicular or dense fragments,  
272 as well as crystals, that represent the primary magma involved in the eruption; non-juvenile  
273 material includes accessory and accidental fragments, as well as crystals that predate the  
274 eruption from which they are deposited. Finally, the composite clasts are mechanical mixtures  
275 of juvenile and non-juvenile (and/or recycled juvenile) clasts. In these mild basaltic  
276 explosions, the non-juvenile component is very scarce, so we focused on the juvenile  
277 component that is characterized by three groups of scoria: (i) spiny-opaque, (ii) spiny-glassy,  
278 and (iii) fluidal, along with golden pumice (Fig. 4). The componentry quantification was  
279 performed for each grain size fraction between  $-5 \phi$  to  $0.5 \phi$  (Figs. 5a and 5b), where a  
280 binocular microscope was used for the identification of grains smaller than  $-1 \phi$  (Table S2).  
281 ~~For the coarse ash fraction (250-300  $\mu\text{m}$  size) of the two bulk deposits collected at the Main~~  
282 ~~Vent, we also performed a morphological quantification using the Morphologi G3 at~~  
283 ~~Laboratoire Magmas et Volcans (LMV) of Clermont Ferrand following the procedure of~~  
284 ~~Leibrandt and Le Pennec (2015) to distinguish between smooth versus spiny clasts within the~~  
285 ~~coarse ash (Fig. 5c).~~

286 In the following, we will use the crystal nomenclature of Welch et al. (2009), with the  
287 strictly descriptive terms of macrocrysts ( $> 3$  mm in diameter) mesocrysts (from 0.3 to 3 mm  
288 in diameter), and microcrysts ( $< 0.3$  mm in diameter).

### 289 **3.32 Particle bulk texture (density, porosity, connectivity) and microtexture**

290 For each sample site (WF, UF and Main Vent, Fig. 1a), we selected ~~27 to 146 juvenile~~ all the  
291 available particles within the 8-32 mm fraction for density and pycnometry measurements  
292 (Table S3). This is the smallest granulometric fraction assumed to be still representative of the  
293 larger size class in terms of density (Houghton and Wilson, 1989; Gurioli et al., 2015), and  
294 has been used in previous textural studies (e.g., Shea et al., 2010). In addition, this size range  
295 is ideal for vesicle connectivity measurements (e.g. Formenti and Druitt, 2003; Giachetti et  
296 al., 2010; Shea et al., 2012; Colombier et al., 2017a, b). Textural measurements  
297 (density/porosity, connectivity and permeability) were performed at the LMV. Density of

298 juvenile particles was measured by the water-immersion technique of Houghton and Wilson  
299 (1989), which is based on Archimedes principle. A mean value for the vesicle-free rock  
300 density was determined by powdering clasts of varying bulk densities, measuring the volumes  
301 of known masses using an Accupyc 1340 Helium Pycnometer, then averaging. The same  
302 pycnometer was also used to measure vesicle interconnectivity for each clast using the  
303 method of Formenti and Druitt (2003) and Colombier et al. (2017a). Permeability  
304 measurements were performed on five clasts: two golden pumices, one fluidal, one spiny  
305 glassy and one opaque scoriae, all collected from the Main Vent (Table S3). Following  
306 Colombier et al. (2017a), the clasts were cut into rectangular prisms to enable precise  
307 calculation of the cross-sectional area, which is required to calculate permeability. These  
308 prisms were then embedded in a viscous resin, which was left to harden for 24 h. The sample  
309 surface had been previously coated with a more viscous resin and then wrapped with parafilm  
310 to avoid intrusion of the less viscous resin inside the pores. The coated samples were placed  
311 with a sample holder connected to a permeameter built in Clermont-Ferrand following  
312 Takeuchi et al. (2008).

313 Vesicle size distribution ~~and crystal content~~ was performed following the method of Shea  
314 et al. (2010) and Leduc et al. (2015), while the total crystallinity, the percentages for both  
315 crystal phases (plagio and clinopyrox) and size-populations (meso and microcrysts) were  
316 calculated using the raw data from FOAM program (Shea et al 2010) and the CSDcorrections  
317 program of Higgins (2000) and the CSDslice data base (Morgan and Jerram 2006) to have the  
318 percentage in 3D. We performed these analyses on ~~nine~~-eight clasts picked up from each  
319 component-density distribution ~~mode~~-(stars in Figs. ~~6e~~6a and 6b). The choice of the clasts  
320 was made mostly on the typologies, rather than on each density distribution, in order to avoid  
321 the analysis of clasts with transitional characteristics. For example, two golden pumice  
322 fragments were selected from the largest clasts that were the less dense and didn't break, even  
323 if the values in vesicularity were similar. A larger number of fluidal fragments were chosen  
324 (even if the density distribution was unimodal) because this typology of clasts was the most  
325 abundant and was emitted all along the active fracture, so we did our best in order to study  
326 products representative of the Western Fracture, the Upper Fracture and the Main Vent  
327 activities. Only one spiny glassy and one spiny opaque were selected, because they were  
328 emitted only at the Main Vent. ~~These data are presented in Figure 4 and we followed the~~  
329 strategy of Leduc et al. (2015) for the quantification of the vesicle size distribution.

330 | A full description of ~~the protocol for the density and connectivity textural~~  
331 | ~~measurements, is available at~~, while the textural data areas well as the raw data of these  
332 | ~~measurements are~~ available at [DynVolc Database \(2017\)](#).-

333

### 334 | **3.43 Bulk geochemistry**

335 | For the determination of the bulk chemistry (Table S4 and Fig. 7) of the different pyroclasts  
336 | we selected the largest pyroclasts of golden pumice and the largest fluidal, spiny glassy and  
337 | spiny opaque scoriae ([Table S4](#)). We also analyzed two fragments of lava, from the beginning  
338 | and the end of the eruption ([Table S4](#)). Samples were crushed into coarse chips using a steel  
339 | jaw crusher and powdered with an agate mortar. Major and trace element compositions were  
340 | analyzed using powder (whole rock composition). In addition, for a sub-set of pyroclasts,  
341 | glass chips (2-5 mm in size) were hand-picked under a binocular microscope and analyzed  
342 | separately for trace elements. For major element analysis, powdered samples were mixed with  
343 | LiBO<sub>2</sub>, placed in a graphite crucible and melted in an induction oven at 1050 °C for 4.5  
344 | minutes, resulting in a homogeneous glass bead. The glass was then dissolved in a solution of  
345 | deionized water and nitric acid (HNO<sub>3</sub>), and finally diluted by a factor of 2000. The final  
346 | solutions were analyzed by ICP-AES. Trace element concentrations were analysed following  
347 | a method modified from Vlastélic et al. (2013). About 100 mg of sample (powder and chip)  
348 | were dissolved in 2 ml of 28M HF and 1 ml of 14M HNO<sub>3</sub> in teflon beaker for 36 hours at  
349 | 70°C. Solutions were evaporated to dryness at 70°C. The fluoride residues were reduced by  
350 | repeatedly adding and evaporating a few drops of concentrated HNO<sub>3</sub>, before being fully  
351 | dissolved in ca. 20 ml of 7M HNO<sub>3</sub>. These solutions were diluted by a factor of 15 with  
352 | 0.05M HF (to reach rock dilution factor of ca. 4000) and trace element abundances were  
353 | determined by quadrupole ICPMS (Agilent 7500). The analyses were performed in plasma  
354 | robust mode (1550 W). The reaction cell (He mode) was used to reduce interference on  
355 | masses ranging from 45 (Sc) to 75 (As). The signal was calibrated externally (every 4  
356 | samples) with a reference basaltic standard (USGS BHVO-2) dissolved as for the samples and  
357 | using the GeoRem recommended values (<http://georem.mpch-mainz.gwdg.de/>). For elements  
358 | that are not well characterized in literature (As, Bi, Tl), or which show evident heterogeneity  
359 | (e.g. Pb) in BHVO-2 powder, the signal was calibrated using the certified concentrations of a  
360 | synthetic standard, which was also repeatedly measured. The external reproducibility ( $2\sigma$

361 error) of the method is 6% or less for lithophile elements and 15% or less for chalcophile  
362 elements.

363

### 364 **3.54 Glass and crystal chemistry**

365 Spot analyses of matrix glass and crystal composition (Table S5) were carried out using a  
366 Cameca SX100 electron microprobe (LMV), with a 15 kV acceleration voltage of 4 nA beam  
367 current and a beam of 5  $\mu\text{m}$  diameter for glass analyses. However, for the spiny opaque  
368 scoria, characterized by abundant crystals with rapid growth textures, a voltage of 8 nA beam  
369 current and a beam of 10  $\mu\text{m}$  diameter were used. For this latter sample, 10 analyses per  
370 sample were performed due to the heterogeneity within the highly crystallised glass (Fig. 8a),  
371 while for the other samples 6 analyses per sample were enough to characterize the clean  
372 homogeneous glass. For crystal analysis, a focused beam was used. For the characterization of  
373 the meso- and micro-crystals, due to their small size, only two to three measurements were  
374 performed, one at the edge, one in the middle and one at the core of the crystals, to check for  
375 possible zonation.

376

### 377 **3.65 Melt inclusions**

378 Melt inclusions (MIs; Table S6, Figs. 8b and 9) were characterized in the olivine mesocrystals  
379 from the three groups of scoriae (fluidal, spiny glassy and spiny opaque), but not in the  
380 pumice group, because c. Crystals ~~in the pumice group~~ were too rare and small to be studied  
381 for ~~melt inclusions~~ MIs.

382 Olivine crystals were handpicked under a binocular microscope from the 100– 250 and  
383 250– 600  $\mu\text{m}$  grain size fractions of crushed tephra. Crystals with MIs were washed with  
384 acetone, embedded in epoxy and polished individually to generate adequate exposure of the  
385 MIs for *in situ* electron probe microanalysis. The MIs are spherical to oblate in shape and  
386 range in size from 10 to 200  $\mu\text{m}$ . Some of the MIs contain shrinkage bubbles but all of those  
387 studied are totally deprived of daughter minerals. Major elements were measured on a  
388 Cameca SX-100 microprobe at LMV (Table S6). For major elements, the larger MIs were  
389 analyzed with a spot diameter of 10-20  $\mu\text{m}$  and sample current of 8 nA, whereas the smaller  
390 MIs were analyzed with a beam of 5  $\mu\text{m}$  and a sample current of 4 nA. The results are given  
391 in Table S6, and analytical details and uncertainties are listed in Óladóttir et al. (2011) and  
392 Moune et al. (2012).

393

## 394 4 Results

### 395 4.1 Deposit texture (grain size, componentry, morphology) and petrological description 396 of the samples

397 The pyroclastic deposits at the Western and Upper fractures sites (Fig. 1a) are formed by  
398 scattered homogeneous smooth fluidal (Figs. 3d) bombs and lapilli [scoria](#). The average  
399 dimension of the fragments is around 4 cm (maximum axis) with bombs up to 10 cm and  
400 scoria lapilli up to 2 cm in size.

401 At the Main Vent, the reversely graded deposit is made up of lapilli and bombs, with  
402 only minor coarse ash (Fig. 3c). The lower 5 cm at the base are very well-sorted and show a  
403 perfect Gaussian distribution with a mode at 4 mm. In contrast, the grain size distribution of  
404 the upper 5 centimetres is asymmetrical with a main mode coarser than 22 cm and a second  
405 mode at 8 mm. This upper deposit is negatively skewed due to the abundance of coarse clasts.  
406 The dataset show a similarity between the grain size distributions of the basal tephra ejected  
407 from the 2014 main vent and the ones for the lava fountaining of the 2010 summit event  
408 (Hibert et al., 2015). On the contrary, the top of the 2014 fall differs from fountain deposits,  
409 being coarser and polymodal, and it is ascribed to dominantly Strombolian activity.

410 In terms of componentry of the deposits, four types of clasts were distinguished (Fig.  
411 4): (i) golden pumice, (ii) smooth or rough fluidal scoriae, (iii) spiny glassy scoria, (iv) spiny  
412 opaque scoria. The pumices are vesicular, light fragments, characterized by a golden to light  
413 brown color, sometimes with a shiny outer surface (Fig. 4a). They are usually rounded in  
414 shape. Golden clasts studied for textures contain a few microcrysts of plagioclase (up to 0.1  
415 mm in diameter), clinopyroxene up to 0.05-0.06 mm in diameter, and small olivine up to 0.03  
416 mm in diameter (Fig. 4), together with large areas of clean, light brown glass. The fluidal  
417 scoria fragments have dark, smooth or rough shiny surfaces (Fig. 4b). They can be more or  
418 less elongated in shape and have spindle as well as flattened shapes. The fluidal fragments are  
419 characterized by rare mesocrysts of plagioclase and clinopyroxene and microcrysts of  
420 plagioclase, clinopyroxene and olivine (Fig. 4b). The spiny glassy fragments are dark, spiny  
421 scoria that range in shape from subrounded to angular (Fig. 4c). These fragments contain  
422 abundant glassy areas, while the spiny opaque fragments lack a glassy, iridescent surface.  
423 Both groups of spiny clasts are characterized by the presence of dark and light brown glass.  
424 The spiny opaque fragments are the densest fragments and have the largest amount of  
425 crystals. They contain, as the most abundant phase, relatively large meso- and micro-crysts of  
426 plagioclase, up to 3 mm long, together with meso- and micro-crysts of clinopyroxene and

427 olivine (Figs. 4c and 4d). In the dark portions of their matrix, tiny fibrous microcrysts of  
428 olivine + clinopyroxene + plagioclase + Fe-Ti oxides occur. The spiny glassy fragments have  
429 the same crystal populations as the spiny opaque ones, but their plagioclases are much smaller  
430 and attain a maximum length of only 0.3 mm. Clusters of plagioclase and clinopyroxene are  
431 present in both the spiny opaque and the spiny glassy fragments, as well as rare macrocrysts  
432 of olivine. The olivine macrocrysts exhibit the typical compositional (Fo 84.2) and  
433 petrographic features of olivine phenocrysts described in previous studies (Clocchiatti et al.,  
434 1979; Albarede and Tamagnan, 1988; Bureau et al., 1998a and b; Famin et al., 2009; Welsch  
435 et al., 2013). They are automorphic, fractured with oxides (mostly chromite) and melt  
436 inclusions (Fig. 4c). Fluidal and pumice fragments studied for textures contain rare  
437 macrocrysts and mesocrysts of olivine, and the crystals are essentially microlites. The pumice  
438 and some fluidal fragments have lower contents of microlites than some fluidal and spiny  
439 fragments, with the latter having the highest microlite content (Table S4). For comparison two  
440 fragments of lava have been analyzed as well (Table S3). The lava fragments are poorly  
441 vesiculated and completely crystalline (Fig. 4e). The lava contains the same paragenesis of  
442 crystals described in the spiny opaque fragments, with the main difference that its matrix is  
443 completely crystallized and constituted mostly by well-formed plagioclase up to 800 microns  
444 and clinopyroxene up to 500 microns. Scarce, smaller olivines, are also present. Evidence of  
445 post emplacement crystallization is mainly constituted by the large amount of tiny rounded  
446 Fe-Ti oxides ubiquitous dispersed.

447 The componentry results are reported in Figure 5 for the Main Vent deposits; the  
448 deposits from the Fractures are characterized exclusively by fluidal clasts (Fig. 3). At the base  
449 of the Main Vent deposit, the coarse fraction of the deposit is rich in golden and fluidal  
450 components that represent more than 60-70\_vol% (Figs. 5a and 5b). The proportion of the two  
451 groups is similar. ~~If we look at the Morphologi-G3 results (Fig. 5c) for the coarse ash~~  
452 ~~fragments, this population is formed exclusively by smooth fragments that correspond to~~  
453 ~~fluidal and golden pumice.~~ In contrast, in the upper, coarse grained fall deposit, the clasts  
454 bigger than 8 mm are dominated by the spiny scoria fragments, while the fraction smaller than  
455 8 mm show a dramatic increase in the golden and fluidal fragments, with the fluidal ones  
456 always more abundant than the golden ones (Figs. 5a and 5b). ~~The small amount of coarse ash~~  
457 ~~fraction in the top deposit, however, is dominated by the presence of spiny fragments (Fig.~~  
458 ~~5c).~~ Abundant light, golden, coarse lapilli pumice and bombs have been found scattered  
459 laterally up to 30 metres from the main axis and were not found in the proximal deposit. On  
460 the basis of the high amount of pumice in the lower part of the deposit, we correlate the large,

461 light clasts with the base of the proximal deposit, and consequently we interpret them as  
462 material emitted at the beginning of the June 2014 eruptive event.

463

#### 464 **4.2 Particle density, porosity connectivity [permeability](#) and texture**

465 Density analyses performed on 200 coarse lapilli reveal a [large variation in density values](#)  
466 [from 390 kg/m<sup>-3</sup> to 1700 kg/m<sup>-3</sup> with a median value at 870 kg/m<sup>-3</sup> \(Table S3\). The fragments](#)  
467 [collected from the Main Vent have a bimodal density distribution, with a main population of](#)  
468 [light fragments having a mode at 800 kg/m<sup>-3</sup>, and a second and denser population centered at](#)  
469 [1400 kg/m<sup>-3</sup> \(Fig. 6a\). The golden and fluidal fragments form the lower-density population](#)  
470 [and the spiny fragments are dominant in the denser population \(Fig. 6a\). For these samples](#)  
471 [there is a marked correlation between porosity and morphology, so that the spiny-opaque](#)  
472 [clasts are the densest \(up to 1600 kg m<sup>-3</sup>, with a vesicularity of 45 vol%\) and the golden](#)  
473 [pumice are the lightest \(minimum density of 390 kg m<sup>-3</sup> with a vesicularity of up to 86 vol%;](#)  
474 [with a Dense Rock Equivalent density of 2.88 x 10<sup>3</sup> kg m<sup>-3</sup>\). ~~bimodal distribution, with a main~~](#)  
475 [population of light fragments having a mode at 800 kg/m<sup>-3</sup>, and a second and denser](#)  
476 [population centered at 1400 kg/m<sup>-3</sup> \(Fig. 6a\).The fluidal fragments, ~~mostly~~ collected at the  
477 Western Fracture \(Fig. 1b\), have a density range from ~~7600~~ to 1400 kg/m<sup>-3</sup> and a mode at  
478 1000 kg/m<sup>-3</sup> \(Fig. 6b\). ~~The five fragments from the only bomb collected at the Upper Fracture~~  
479 ~~are characterized by two distinct density values, the low density one \(700-800 kg/m<sup>-3</sup>\) refers~~  
480 ~~to the core of the sample, while the high density one \(1400-1500 kg/m<sup>-3</sup>\) represents the~~  
481 ~~quenched external rim of the bomb.~~The bulk deposit collected close to the Main Vent has a  
482 bimodal density distribution, with the golden and fluidal fragments forming the lower density  
483 population and the spiny fragments being dominant in the denser population \(Fig. 6\). For  
484 these samples there is a marked correlation between porosity and morphology, so that the  
485 spiny-opaque clasts are the densest \(up to 1600 kg m<sup>-3</sup>, with a vesicularity of 45 vol%\) and the  
486 golden pumice are the lightest \(minimum density of kg m<sup>-3</sup> with a vesicularity of up to 86  
487 vol%; with a Dense Rock Equivalent density of 2.88 x 10<sup>3</sup> kg m<sup>-3</sup>\). Finally, the two fragments  
488 of lava show the ~~lowest~~highest density values at 1800 and 2150 kg m<sup>-3</sup>. This last value  
489 is one of the ~~lowest~~highest found in the lava collected from 2014 up to 2017 \(see Fig. 13 in  
490 \[Harris et al., 2017 and unpublished data\]\(#\)\)](#)

491 [In all these samples,](#) ~~t~~The increase in vesicularity correlates with an increase in the  
492 amount of small (0.1 mm), medium (0.5-1 mm) and large (up to 4 mm) vesicles. In the fluidal  
493 clasts, these vesicles have a regular rounded or elliptical shape and are scattered throughout

494 the sample. The lightest pumices are often characterized by the presence of a single, large  
495 central vesicle (10 – 15 mm) with the little vesicles and a few medium vesicles distributed all  
496 around it (Fig. 4). The spiny glass texture is characterized by a lower amount of large vesicles  
497 than in the pumice and by the presence of mostly medium sized vesicles, while the spiny  
498 opaque has more irregular shaped, very large (up to 10 mm) vesicles with a small and a  
499 medium sized bubble population. In the spiny glass samples, the glass is more or less brown,  
500 with the dark brown portions being the ones with the lowest vesicle content and the highest  
501 microlite content. The opaque samples have a central, very dark glass portion, with low  
502 vesicle content, and a more vesicular glassy portion at the outer edges (Fig. 4). The two  
503 fragments of lava are poorly vesiculated (Fig. 6a) and characterized by large, irregular  
504 vesicles (up to 5 mm in diameter). Cluster of small vesicle (up to 0.1 mm) are scattered  
505 between the large ones.

506 The VSD histograms picture well the decrease in percentage of vesicles from the  
507 golden to the lava (Fig. 4) as well as the increase in coalescence and or expansion in the spiny  
508 fragments, marked by the increasing of the large vesicles population (Figs 4c and 4d). This  
509 trend is also marked by the decrease in number of vesicle for unit of volume ( $N_v$ , Fig. 4) from  
510 the golden to the lava. Finally, the trend is also mirrored by the total percentage of crystals  
511 (calculated in 3D, Fig. 4 and reported both in 3D and 2D for each sample in in Table S3) that  
512 increases with the increase of density of the clasts, from a minimum of 8% in vol. for the  
513 golden up to 55 % in vol. for the spiny opaque scoria, up to 100 % in vol. for the lava (Fig. 4).  
514 Mesocrystals, formed mostly by the same proportion of plagioclase and clinopyroxenes are  
515 absent or very scarce in the golden and fluidal fragments, while they reach their maximum  
516 values, up 21% in vol. in the spiny opaque fragment. The ~~microcrystals~~ population of  
517 microcrystals is mostly constituted by plagioclases that range from a minimum of 6 % in vol.  
518 in the golden, up to 23-25 % in vol. in the spiny fragments and to 64 % in vol. in the lava.

519 The connectivity data (Fig. 6c-d) also indicate that the fluidal and golden clasts have a  
520 larger amount of isolated vesicles (up to 40% in volume) ~~in~~ with respect to the spiny products.  
521 The fluidal clasts from the Western Fracture are the most homogeneous with an average  
522 percentage of isolated vesicles around 30% in volume. In contrast, bBoth the pumice and the  
523 fluidal fragments from the Main Vent, characterized by higher values of porosity (> 75%),  
524 have a wide range in ~~er~~ percentage of isolated vesicles (between 20 and a few percentage in  
525 volume)with high vesicularity are characterized by fewer amounts of isolated vesicles. The  
526 fragments of the bomb collected at Upper Fracture are consistent with a vesiculated core  
527 characterized by scarce isolated vesicles and the quenched rind that has 30 % of isolated



528 [vesicles](#). Finally the spiny fragments have the lowest content of isolated vesicles (0-5% in  
529 volume). [Although the presence of these isolated vesicles, all the samples show high values of](#)  
530 [permeability \(Fig. 6d\)](#).

531

### 532 **4.3 Chemistry ~~and geochemistry~~ of the products**

533 Major and trace element concentrations of whole-rock and hand-picked glass samples are  
534 reported in Table S4. Whole rock major element composition is very uniform (e.g.,  
535 6.5<MgO<6.7 wt%) and well within the range of Steady State Basalts (SSB), the most  
536 common type of basalts erupted at Piton de la Fournaise (Albarède et al., 1997). However,  
537 compatible trace elements, such as Ni and Cr, are at the lower end of the concentration range  
538 for SSB (<100ppm) indicating that the June 2014 eruption sampled relatively evolved melts.  
539 Ni and Cr generally show higher concentrations in 2014 bulk rocks (79<Ni<92ppm and  
540 71<Cr <87ppm) compared to the 2014 glass chips (66<Ni<73ppm and 54<Cr <59ppm for all  
541 but two chips). In the Cr vs Ni plot (Fig. 7a), whole rocks plot to the right of the main  
542 clinopyroxene +/- plagioclase-controlled melt differentiation trend. This trend is controlled by  
543 the addition of Ni-rich olivine (Albarède and Tamagnan, 1988). We estimate that the Ni  
544 excess results from the occurrence of a low amount (0.7 to 1.3 wt%) of cumulative olivine in  
545 whole rocks, consistent with thin section observations. The composition of olivine  
546 macrocrysts (ca. Fo84) is too magnesian to be in equilibrium with the low-MgO evolved  
547 composition of the 2014 magma. Using our estimate for the amount of cumulative olivine, we  
548 recalculate the olivine-corrected MgO content of the 2014 magma at 6.2 wt%. The June 2014  
549 melt is thus only moderately depleted in compatible elements compared to the previous  
550 eruption of December 2010 (MgO~6.6 wt%, Ni~80 ppm, Cr~120 ppm). Conversely, the June  
551 2014 melt is significantly depleted in compatible elements compared to the earlier November  
552 2009 eruption, which sampled relatively primitive magmas (average MgO~7.7 wt%, Ni~135  
553 ppm, Cr~350 ppm) (Fig. 7a). The 2014 evolved composition plots at the low-Ni-Cr end of  
554 Piton de la Fournaise historical differentiation trend (Albarède and Tamagnan, 1988), near the  
555 composition of lavas erupted on 9 March 1998 after 5.5 years of quiescence (1992-1998).  
556 Note that olivine accumulation at PdF generally occurs in melt having ca.100 ppm Ni  
557 (Albarède and Tamagnan, 1988). Olivine accumulation in evolved melts (Ni < 70 ppm) seems  
558 to be a distinctive feature of many small post-2007 eruptions (e.g. this event and the three  
559 2008 eruptions, see Di Muro et al., 2015).

560 A closer inspection of Ni-Cr variability in June 2014 whole rock samples (Fig. 7b)  
561 reveals that scoria from the Western Fracture (140624-9b-6, Table S4) and early erupted lavas  
562 (1406-21-1, Table S4) have the lowest amount of olivine (<0.9%) whereas scoria from the  
563 Upper Fracture (140624-13a) and late erupted lavas (140324-12) have a slightly higher  
564 amount of olivine (>1.2%). This is consistent with the general trends observed at PdF of  
565 olivine increase from the start to end of an eruption (Peltier et al., 2009).

566 The so called “olivine control trend” in Ni-Cr space cannot be explained either by  
567 addition of pure olivine (which contains less than 500 ppm Cr (Salaün et al., 2010; Di Muro et  
568 al., 2015; Welsch et al., 2009), or by the addition of olivine plus pyroxene (which would  
569 require ca. 50% pyroxene with 970 ppm Ni and 4800 ppm Cr, see Fig. 7 caption). Instead,  
570 addition of olivine hosting ca. 1% Cr-spinel (with 25 wt.% Cr) accounts for data and  
571 observations, and is consistent with crystallization of olivine and Cr-spinel in cotectic  
572 proportions (Roeder et al., 2006). The fact that some samples (golden pumice) plot off the  
573 main, well-defined array, can be explained either by addition of more or less evolved olivine  
574 crystals (with the range of Fo 80-85 measured in June 2014 samples) and/or slight variations  
575 ( $\pm 0.02\%$ ) in the proportion of Cr-spinels (Fig. 7b).

576 The glass chemistry of the four clast types allows us to correlate porosity and oxide  
577 contents and shows an increase in MgO from the spiny opaque to fluidal and golden  
578 fragments (Fig. 8a). Consistent with petrological and textural observations, the spiny opaque  
579 is the most heterogeneous type of clast in terms of glass composition (Fig. 8). The glassy  
580 portion at the edge of the clast is similar to the spiny glass, while the interior, characterized by  
581 dark areas rich in tiny fibrous microcrysts, shows scattered glass compositions with very low  
582 MgO content as well as a decrease in CaO (Fig. 8). We attribute the significant variation in  
583 glass composition within the different components to variable degrees of micro-crystallisation  
584 as the bulk chemistry of all clasts is very similar and globally homogeneous.

585

#### 586 **4.4 Melt inclusions**

587 MI analyses must be corrected for post-entrapment host crystallisation at the MI - crystal  
588 interface. We used a  $K_d = (\text{FeO}/\text{MgO})_{\text{ol}} / (\text{FeO}/\text{MgO})_{\text{melt}} = 0.306$  (Fisk et al., 1988; Brugier,  
589 2016) and an average  $\text{Fe}^{3+}/\Sigma\text{Fe}_{\text{total}}$  ratio of 0.11 (Bureau et al., 1998a; Di Muro et al., 2016 and  
590 references therein) defined for PdF magmas. For the June 2014 melt inclusions, the post  
591 entrapment crystallization (PEC) ranges from 2.9 to 10.5 wt%. Raw and corrected major and  
592 volatile element concentrations of MIs are reported in Table S6.

593 Host olivines span a large compositional range from Fo<sub>80</sub> to Fo<sub>86</sub>. Despite the evolved  
594 bulk composition of the magma, most olivines are quite magnesian (Fo<sub>83-85</sub>) and are not in  
595 equilibrium with the evolved host magma. On the contrary, Mg-poor olivines (Fo<sub>80-81</sub>) can be  
596 considered as being in equilibrium with the bulk rock composition. The corrected  
597 compositions of MIs in phenocrysts from the different samples partly overlap with the  
598 evolved bulk rocks (MgO<sub>wr</sub>: 6.1-7.2 wt%) and extend to higher MgO contents of up to 8.8  
599 wt% (Table S6). MIs display a narrow range of transitional basaltic compositions (K<sub>2</sub>O= 0.5-  
600 0.9 wt%) and show no significant difference between the three types of scoriae. The major  
601 element composition of melt inclusions correlates with that of the host olivines. Melt  
602 inclusions in the high Fo-olivines have the highest MgO, CaO and TiO<sub>2</sub> and lowest K<sub>2</sub>O  
603 concentrations (Table S6). It is interesting to note that the June 2014 products contain two  
604 populations of magnesian (Fo<sub>>83</sub>) olivines hosting melt inclusions with two distinct Ca  
605 contents. Most of the magnesian olivines contain MIs with unusually high CaO contents (11.6  
606 – 12.9 wt%) and high CaO/Al<sub>2</sub>O<sub>3</sub> ratios (0.8-0.9), higher than that of the bulk rocks (0.8) (Fig  
607 8). The occurrence of olivines with “high Ca” melt inclusions has been observed in all three  
608 different types of scoriae. A few magnesian olivines and all Mg-poor olivines (Fo<sub>80.5-83.6</sub>) host  
609 MIs with lower CaO contents (11.4 wt%). This latter composition overlaps with that of the  
610 bulk rock (Fig 8). The “high Ca” population of inclusions is also enriched in TiO<sub>2</sub> and Al<sub>2</sub>O<sub>3</sub>  
611 and depleted in MgO, FeO<sub>T</sub> and Na<sub>2</sub>O for a given olivine Fo content with respect to the “low  
612 Ca” population. Both low- and high-Ca populations of melt inclusions have similar K<sub>2</sub>O  
613 contents and total alkali content increases from 3 wt% at 12.6 wt% CaO, to 3.5 wt% at 10.8  
614 wt% CaO. However, we remark that high Ca melt inclusions from the June 2014 activity  
615 record a significant scattering in K<sub>2</sub>O contents, which range from 0.55 to 0.9 wt%. These  
616 anomalous compositions potentially track processes of crystal dissolution (e.g. pyroxene  
617 dissolution).

618 MIs in olivines from June 2014 can best be compared with those of other recent small-  
619 volume and short-lived eruptions which emitted basalts with low phenocryst contents, like  
620 those in March 2007 (0.6 Mm<sup>3</sup>) and November 2009 (0.1 Mm<sup>3</sup>) (Roult et al., 2012). March  
621 2007 aphyric basalt has a bulk homogeneous composition with intermediate MgO content  
622 (MgO<sub>wr</sub>: 7.33 wt%; K<sub>2</sub>O: 0.67 wt%). Their olivines (Fo 81) are in equilibrium with the bulk  
623 rock and their composition is unimodal (Di Muro et al., 2014). November 2009 products are  
624 the most magnesian lavas emitted in the 2008-2014 period, slightly zoned (MgO<sub>wr</sub>: 7.6-8.3  
625 wt%; K<sub>2</sub>O: 0.75 – 0.62 wt%) and contain a few percent of normally zoned olivine macrocrysts  
626 with bimodal composition (Fo81 and Fo83.5, see Di Muro et al., 2016). June 2014 bulk rocks

627 (MgO<sub>wr</sub>: 6.7 wt%; K<sub>2</sub>O: 0.75 wt%) and melt inclusions in Fo<sub>80-81</sub> olivines are quite evolved.  
628 Their composition is close to that of products emitted by summit intracaldera eruptions in  
629 2008, ca. 1.5 years after the large 2007 caldera forming eruption (Di Muro et al., 2015) (Fig.  
630 8). As already reported for 2008 products, many olivine macrocrysts of 2014 are clearly too  
631 magnesian to be in equilibrium with the relatively evolved host melts. Overall, MgO content  
632 in 2007-2014 melt inclusions tends to decrease with decreasing Fo content of the host  
633 olivines. MIs in olivines also exhibit a trend of linear decrease in MgO and increase in FeO  
634 from April 2007 to 2009-2014 products (Fig. 9). Melt inclusions in March 2007, November  
635 2009 and June 2014 follow the same trend of FeO enrichment (Fig. 9). In the large-volume  
636 and olivine-rich April 2007 products, MIs in magnesian olivines with Fo<sub>>82</sub> have distinctly  
637 higher MgO, FeO and lower SiO<sub>2</sub> and Al<sub>2</sub>O<sub>3</sub> than MIs in 2009-2014 products. The distinctive  
638 FeO enrichment of many of the MIs from the April 2007 oceanite has been interpreted by Di  
639 Muro et al. (2014) as a result of post-entrapment modification ~~during long~~related to new  
640 magma inputs into long lasting magma storage.

641 Two populations of low- and high-Ca melt inclusions are also found in the November  
642 2009 olivines. Low-Ca melt inclusions from the November 2009 and June 2014 eruptions  
643 indicate a single trend of chemical evolution (Fig. 8), consistent with bulk rock compositions.  
644 June 2014 products have lower MgO and CaO contents than those from November 2009.  
645 Significant scattering in K<sub>2</sub>O content (0.6-0.9 wt%) is found in low-Ca inclusions from 2009,  
646 as observed in high-Ca inclusions from the 2014 eruption, but they share similar K<sub>2</sub>O  
647 contents. In 2009 and 2014 products, K<sub>2</sub>O content of melt inclusions is partly anti-correlated  
648 with the olivine Fo content. This observation has been attributed to moderate heterogeneity of  
649 primary melts feeding the plumbing system of PdF. Rapid temporal changes of K<sub>2</sub>O content in  
650 PdF basalts have been reported (Boivin and Bachelery, 2009).

651

#### 652 **4.5 Mineral composition and glass – plagioclase equilibrium**

653 All 2014 scoriae (spiny, fluidal, golden) contain the same paragenesis of olivine,  
654 clinopyroxene and plagioclase. The composition of minerals found in golden, fluidal and  
655 spiny scoriae is indistinguishable.

656 In olivines, average MgO content decreases from macrocrysts (Fo<sub>84.1</sub>) to mesocrysts  
657 (Fo<sub>79.6</sub>) to microlites. Olivine microlites (Table S5) are normally zoned. Their composition  
658 ranges from Fo<sub>78.0-75.3</sub> in the cores to Fo<sub>74.3-70.5</sub> in the rims. Overall, olivines in 2014 products  
659 span the full range of typical Fo contents of recent Piton de la Fournaise magmas (Boivin and

660 Bachèlery, 2009; Di Muro et al., 2014; 2015). Clinopyroxene composition (augites) ranges  
661 from  $\text{En}_{53}\text{Fs}_{15}\text{Wo}_{32}$  to  $\text{En}_{41}\text{Fs}_{14}\text{Wo}_{45}$ . Their average composition ( $\text{En}_{45}\text{Fs}_{14}\text{Wo}_{41}$ ) is consistent  
662 with that found in other recent evolved melts like those emitted by the 2008 eruptions (Di  
663 Muro et al., 2015) and more generally in recent Piton de la Fournaise products (Boivin and  
664 Bachèlery, 2009). Clinopyroxenes are unzoned, the composition of cores and rims is very  
665 similar and close to that found in microcrysts and mesocrysts. Plagioclase composition ranges  
666 from  $\text{An}_{79.5}\text{Ab}_{19.9}\text{Or}_{0.6}$  to  $\text{An}_{63.1}\text{Ab}_{35.7}\text{Or}_{1.2}$  with a bimodal distribution ( $\text{An}_{76.5-79.5}$  and  $\text{An}_{63.1-}$   
667  $72.9$ , [Fig. 10a](#)). Similar bimodal distributions ~~were~~ observed in ~~the evolved 2008~~ [many other](#)  
668 products, ~~in particular from the November 2008 eruption at PdF~~ (Di Muro et al., 2015).  
669 Mesocrysts ( $\text{An}_{75.5}\text{Ab}_{23.8}\text{Or}_{0.7}$  on average) are more calcic with respect to microcrysts  
670 ( $\text{An}_{65.7}\text{Ab}_{33.1}\text{Or}_{1.2}$  on average). Normal zoning is ~~commonly~~ found from plagioclase cores to  
671 rims ([Fig. 10a](#)). ~~The composition and zonation of 2014 plagioclases clearly, which contrasts~~  
672 with the complex ~~and often reverse~~ zoning patterns ~~and intermediate composition of the~~  
673 ~~previously reported for the 2008 PdF~~ products ~~that were attributed to pre-eruptive magma~~  
674 ~~heating~~ (Di Muro et al., 2015).

675 Plagioclase-melt equilibrium and melt composition in pyroclastic rocks and water-  
676 quenched lavas were used to estimate both temperature and water content dissolved within the  
677 melt ([Fig. 10b and Table S5](#)). Temperature estimates are based on the [\(dry\)](#) equation of Helz  
678 and Thornber (1987) ~~modified-recalibrated~~ by Putirka (2008). ~~Dissolved w~~Water content was  
679 calculated from the plagioclase hygrometer of Lange et al. (2009) at 50 MPa. ~~This pressure~~  
680 ~~correspondsing~~ to the ~~maximum-average~~  $\text{CO}_2\text{-H}_2\text{O}$  ~~saturation~~ pressure ~~estimation~~  
681 (recalculated with Papale et al., 2006); typically recorded in melt inclusions from central  
682 products at PdF (e.g. 1931 eruption ~~in~~; (Di Muro et al., (2016) and references therein). This  
683 pressure roughly corresponds to the sea level depth, which is inferred to be the location of the  
684 potential main shallow magmatic reservoir (Peltier et al., 2009; Lengliné et al., 2016; Coppola  
685 et al., 2017). The application of the ~~plagioclase hygrometer of Lange et al. (2009)~~ ~~hydrous~~  
686 ~~thermometer of Putirka (2008)~~ makes it possible to estimate the dissolved water content in the  
687 melt with a nominal uncertainty of 0.15 wt% and is only slightly dependent on pressure.  
688 Plagioclase compositions not in equilibrium with the melt (glass or bulk rock) are those  
689 mesocryst cores with the highest ( $\text{An}_{>76.5}$ ) anorthite content ([Fig. 10a and Table S5](#)). Such  
690 compositions are more in equilibrium with CaO-richer magnesian melts than those measured  
691 in matrix glasses and bulk rocks of 2014 eruption ~~and likely formed during early stages of~~  
692 ~~shallow magma differentiation~~ ([Fig. 10a](#)).

693 In order to determine pre-eruptive conditions, calculations were performed only on  
694 paired plagioclase rims and matrix glasses in equilibrium, using the plagioclase-melt  
695 equilibrium constant of Putirka (2008) calibrated for melts whose temperature exceeds  
696 1050°C ( $K_{An-Ab} = 0.27 \pm 0.05$ ). Our review of published and unpublished data shows that melt  
697 temperature progressively decreases from April 2007 (1188 $\pm$ 16 °C) to January-October  
698 2010 (1147 $\pm$ 9°C) and positively correlates with K<sub>2</sub>O content in melts which increases from  
699 0.70 to 0.96 wt% (Fig. 10b). The melts from the June 2014 eruption record the lowest  
700 temperatures in post-2007 eruptions (1131 $\pm$ 15 °C) together with the highest K<sub>2</sub>O-enrichment  
701 (K<sub>2</sub>O: 0.90 $\pm$ 0.12 wt%). The lowest temperatures are recorded by spiny scoriae, while the  
702 temperature of golden scoriae overlaps with that of 2010 products emitted before the 2010-  
703 2014 phase of quiescence. In spite of the large variability in melt composition and  
704 temperature, average pre-eruptive water content dissolved in the melts (0.5  $\pm$  0.2 wt%) is  
705 quite homogeneous for the whole 2008-2014 period. In 2014, the lowest estimated dissolved  
706 water content (down to 0.38 wt%) is for the golden and some fluidal scoriae, while the  
707 maximum amount (0.68 wt%) is for the spiny opaque scoriae. However, water content  
708 estimated from core-bulk rock equilibrium (0.3 $\pm$ 0.1 wt%) is slightly lower than that estimated  
709 from rim and microlite-matrix glass equilibrium (0.5 $\pm$ 0.2 wt%), but the difference broadly  
710 overlaps the nominal uncertainty related to calculations. Dissolved water contents in melts of  
711 the pyroclasts are thus ~~lower than~~intermediate between those measured in 2007 melt  
712 inclusions (H<sub>2</sub>O: 0.8  $\pm$  0.15 wt% and up to 1.1 wt%) and ~~higher than~~those typically found in  
713 degassing matrices of lava and Pele's hairs of 2007 (Fig. 10; 0.2 wt%; see Di Muro et al.,  
714 2015; 2016).

715

## 716 5 Discussions

### 717 5.1 ~~The activity~~Eruptive dynamics

718 The activity fed by the uppermost Western Fractures and Upper Fractures (Fig. 1) ~~was~~  
719 very short-lived, as shown by the presence of only scattered bombs and coarse lapilli (Figs ~~3e~~  
720 3d and 3e). The homogeneity of these clasts, their coarse grained nature and the fluidal  
721 smooth texture are in agreement with very short-lived fire-fountaining/magma jets. Glassy  
722 outer surfaces of clasts have been interpreted as a late-stage product of fusion by hot gases  
723 streaming past the ejecta within the jet/fountain (Thordarson et al., 1996; Stovall et al., 2011).  
724 However, the occurrence of this process is not supported by the homogeneous glass  
725 composition in our fluidal clasts. Therefore, we interpret these features here just as rapid

726 [quenching and not re-melting. Vlastélic et al. \(2011\) have documented the mobility of alkalis](#)  
727 [and other elements on PdF clasts having experiences long exposures to acid gases, that in the](#)  
728 [2014 events is prevented by the short duration of the events.](#)

729 At lower altitude and close to the Main Vent (Fig. 1), the 5 cm layer at the base of the  
730 fall deposit is fine-grained (Figs. 3b and 3c), rich in fluidal and golden fragments (Fig. 5),  
731 with a perfect Gaussian grain size curve (Fig. 5), and similar to that reported from the weak  
732 2010 fountaining event (Fig. 3e-3f and Hibert et al., 2015). Therefore, we interpret this  
733 deposit as being due to weak Hawaiian like fountaining (sustained, but short-lived) activity.  
734 [We want to remark here that this activity happened during the night and was not observed.](#)  
735 The top of the same deposit is coarse grained (Figs 3b and 3c), bimodal, has a lower content  
736 in coarse ash (Table S2) and is rich in spiny opaque and spiny glass fragments (Fig. 5). The  
737 reverse grain size likely records the transition from early continuous fountaining to late  
738 discrete Strombolian activity (observed and recorded the 21 of June 2014, Fig. 2). [This](#)  
739 [transition in activity is](#) typical of many eruptions at PdF (Figs. 2a and 2b and Hibert et al.,  
740 2015). The reverse grading of the whole deposit (Figs. 3b and 3c) is thus not correlated with  
741 an increase in energy of the event, but with two different eruptive dynamics and  
742 fragmentation processes. The decrease in coarse ash, which correlates with the decrease in  
743 energy of the event, highlights the most efficient fragmentation process within the Hawaiian  
744 fountaining with respect to the slow gas ascent and explosion of the Strombolian activity.  
745 These conclusions are consistent with (i) the continuous and progressive decrease in intensity  
746 of Real time Seismic Amplitude Measurement recorded by the OVPF seismic network  
747 (unpublished data), and (ii) satellite derived TADR (Coppola et al., 2017) which suggest  
748 continuous decay of magma output rate after an initial short-lived intense phase (Coppola et  
749 al., 2017).

750

## 751 **5.2 Interpretation of the different textural signatures and the meaning of the 4 typologies** 752 **of clasts.**

### 753 [1\) Background on the texture of clasts from Hawaiian and Strombolian activities](#)

754

755 [The first microtextural analysis of Hawaiian ejecta was performed by Cashman and Mangan](#)  
756 [\(1994\) and Mangan and Cashman \(1996\) on pyroclasts from 1984 to 1986 Pu'u 'Ō'ō](#)  
757 [fountainings. The authors defined two clast types: 1\) 'scoria' consisting of closed-cell foam of](#)  
758 [≤85% vesicularity, with round, undeformed, broadly-sized vesicles, and 2\) 'reticulite', an](#)

759 [open-cell polyhedral foam with ~1 μm thick vesicle walls with >95% vesicularity. They stated](#)  
760 [that the scoria to reticulite transition is a consequence of Ostwald ripening, where larger](#)  
761 [bubbles grow at the expense of smaller bubbles due to post-fragmentation expansion of clasts](#)  
762 [within the fountain. According to this model, scoria preserves textures closer to conditions at](#)  
763 [fragmentation, whereas continued vesiculation and clast expansion in the thermally-insulated](#)  
764 [core of the fountain results in reticulate. This model was confirmed at lava fountains at Etna](#)  
765 [\(Polacci et al., 2006\), Villarrica \(Gurioli et al., 2008\), Kīlauea Iki, \(Stovall et al., 2011 and](#)  
766 [2012\), Mauna Ulu \(Parcheta et al., 2013\) and Al Madinah \(Kawabata et al., 2015\). These last](#)  
767 [authors also measured the connected and isolated porosity in the AD1256 Al-Madinah](#)  
768 [Hawaiian fountaining eruptions. They found that the reticulite-like textures from the central](#)  
769 [part of these very high fountains showed isolated vesicles in agreement with low shear rates](#)  
770 [and low viscosity melts, where bubbles may grow spherically and remain isolated. In contrast,](#)  
771 [at margins of the fountains, high shear may lead to stretching and mechanical coalescence of](#)  
772 [bubbles, forming the common, fluidal types of particles seen also in the deposits. They also](#)  
773 [stated that lower vesicularity and greater isolated porosity were found in some tephra](#)  
774 [interpreted as resulting from Violent Strombolian eruptive phases.](#)

775 [The data that we found in our study of the typical activity of PdF agree only partially](#)  
776 [with all these interpretations. The reason is that we sampled and measured products of very](#)  
777 [weak Hawaiian to Strombolian activities. If we plot the approximate durations and masses of](#)  
778 [these events on the Houghton et al. \(2016\) diagram, the 2014 activity of PdF falls into the two](#)  
779 [fields for transient and fountaining activity, but at the base of the diagram. We here show for](#)  
780 [the first time that short lived and weak fountaining can preserve pyroclast textures that can be](#)  
781 [considered as representing a valid approximation to magma ascent and fragmentation](#)  
782 [conditions before the explosions and also provide some information about the ~~shallow~~](#)  
783 [reservoir pre-eruptive storage conditions. The occurrence of time-variable ascent conditions is](#)  
784 [also reflected in the time evolution of ~~explosion~~eruptive dynamics, with the golden and fluidal](#)  
785 [emitted from the low fountaining episodes and the spiny fragments from the Strombolian-like](#)  
786 [explosions](#)

787  
788 [2\) \*The four typologies of clasts and their distribution in space and in time in the 2014\*](#)  
789 [erupton at PdF](#)

790  
791 [So, as described in 5.1, longitudinal variation in eruptive style along the fracture system](#)  
792 [produces a spatial variability in the proportions of the four typologies of clasts. The](#)



793 uppermost fractures (Western and Upper Fractures, Fig. 1a) are characterized solely by fluidal  
794 fragments (Fig. 4b); they lack both the spiny and the golden components. In addition, these  
795 fluidal clasts are the ones showing the smoothest surfaces (indicative of rapid quenching in a  
796 very hot environment), low porosity values (between 50 to 77%, Fig. 6b), the highest content  
797 in isolated vesicles (~ 30% in vol. Fig. 4c), and low vesicle numbers (3 to 5 x 10<sup>6</sup>, Fig. 4b),  
798 comparable to the spiny fragments. They have scarce mesocrysts (1-2 % in vol. Table S3) and  
799 very low amount of microcrysts of plagioclase and clinopyroxene (3 to 11 % in vol., Table  
800 S3). These fluidal scoria fragments were emitted by short lived jets of magma, therefore they  
801 underwent rapid quenching in a very hot environment that prevented any expansion or further  
802 vesiculation and preserved a very high number of isolated vesicles (Fig. 6d). Syn-eruptive  
803 crystallization was hindered by high ascent velocities in the dyke, due to the sudden release of  
804 over-pressure in the shallow magma reservoir.

805       The four typology of clasts, golden pumice, fluidal scoria and the spiny fragments  
806 (Fig. 4), were found associated only at the Main Vent. They proportion of these fragments  
807 correlate with the ~~energy and the activity of the event~~eruptive dynamics, being the golden  
808 lapilli and fluidal clasts dominant in the Hawaiian, more energetic activity at the beginning of  
809 the eruption (during the night between the 20 and the 21 of June 2014) and the spiny  
810 fragments dominant during the Strombolian activity, coinciding with the decreasing in Mass  
811 ~~charge~~Discharge Rate (MDR, early in the morning of the 21, Fig. 2 and Coppola et al., 2017).  
812 The golden and fluidal fragments from the Main Vent show the highest porosity (86 %, Fig.  
813 6a) variable proportions of isolated vesicles (Fig. 6c) and high, but variable, N<sub>v</sub> numbers  
814 (Figs. 4a). They are also characterized by a uniform vesicle size population with clear  
815 evidence of incipient expansion, especially in the fluidal fragments (Figs. 4a and 4b). From  
816 the connectivity graph, there is a clear decrease in isolated vesicles with the increase in  
817 vesicularity (Fig. 6c). The content in crystal, mostly formed by micro~~crysts~~crysts of sodic  
818 plagioclase (Fig. 10a) due to ~~conduit~~magma degassing during its ascent and decompression in  
819 the conduit (Di Muro et al., 2015), is very low, especially in the golden pumice (up to 15% in  
820 vol.), and slightly higher for the fluidal clasts (up to 23 % in vol.). We interpret the golden  
821 fragments, at the Main Vent, to be the fastest (low amount of microcrysts) and less degassed  
822 magma (high vesicularity coupled with high N<sub>v</sub>), which experienced only a very short  
823 residence time in the magma transport system (dyke+vent), followed by the fluidal fragments.  
824 In contrast the spiny fragments, characterized by higher percentage of microcrysts and  
825 mesocrysts, by the lack of isolated vesicles, by the presence of coalescence signature and low  
826 N<sub>v</sub> values (Figs. 4c and 4d), are indicative of an extensively degassed and cooled magma. The

827 presence of the mesocrysts (that formed in the shallow reservoir) in the spiny fragments, and  
828 their slightly cooler temperature (Fig. 10b), strongly support this interpretation. The spiny  
829 fragments likely record the slowest ascent velocity and the longest residence time in the  
830 reservoir+dyke+vent system compared to the golden/fluidal counterpart. Therefore these  
831 fragments are associated with Strombolian events, and decreasing in MDR of the activity, in  
832 agreement with their slower ascent that allow large syneruptive crystallization.

833 Among spiny fragments, the opaque ones are the densest, they lack a uniform glassy  
834 surface, and they are characterized by i) very high microlite content, ii) strong coalescence  
835 signature (Fig. 4d), iii) heterogeneous glass chemistry, and iv) mingling with hotter magma at  
836 the **clast** edges (Fig. 8a). All these features reveal the composite nature of these clasts. We  
837 interpret the spiny opaque as spiny glass fragments recycled inside the eruptive vent during  
838 the explosions, being the densest portion of the magma prone to fall back in the vent/fracture  
839 (Fig. 2b).

### 841 3) Degassing-driven versus cooling-driven crystallization

842  
843 Syn-eruptive degassing is favoured by bubble connectivity/permeability in the ascending  
844 magma, enhanced by syn-eruptive crystallisation in the conduit (especially microcrysts of plg,  
845 Fig. 10a), even for magmas at low vesicularity. However, our dataset also support the  
846 occurrence of magma stratification in the reservoir. Textural and petrological data demonstrate  
847 that the initial activity emitted a small volume of melt (represented by golden and large part of  
848 the fluidal fragments) with very scarce crystals. This crystal-poor melt was followed in time  
849 by the main volume of magma that contains a larger amount of mesocrysts (spiny clastst and  
850 lava). Lava flows represent the main volume emitted in the 2014 eruption. Mesocrysts are  
851 absent in the golden, scarce in the fluidal and more abundant in the spiny (Figs 4b c and 4d)  
852 and lava (Fig. 4e) and consist in an equal percentage of plg and cpx and minor olivine. Their  
853 composition indicate that they formed in the reservoir, as shown by their different  
854 composition in respect to the microcrysts counterparts (Fig. 10a) that formed during melt  
855 degassing in the conduit. Most important, a large amount of microcrysts in lava formed in the  
856 reservoir as well during magma cooling (Figure 10a). So, we have a range of crystallization  
857 conditions. The fact that the lighter plg are not concentrated in the upper and early erupted  
858 portion of the reservoir can be due either to the fact that often they are locked in clusters with  
859 the cpx or that this melt was expelled from the crystal-rich portion of the reservoir (see Figure  
860 10b). Water exsolution from the melt can result from its extensive crystallization, which

861 induces an increase in dissolved volatile content, up to saturation (second boiling) and can  
862 drive melt-crystal separation.

863 In conclusion, the crystals in the 2014 fragments do reflect the shallow reservoir  
864 conditions and the ascent degassing processes. Can we affirm that the vesicularity provide  
865 similar informations?

866

#### 867 4) Textural syn-eruptive versus post fragmentation modifications

868

869 To prove that the 2014 clasts have been not modified by post fragmentation expansion  
870 process, following Stovall et al. (2011), we use a plot of vesicle-to-melt ratio ( $V_G/V_L$ , after  
871 Gardner et al., 1996) and vesicle number density ( $N_V$ , Fig. 11). As ~~explained~~demonstrated by

872 Stovall et al. (2011), addition of small bubbles leads to an increase in  $N_V$  and only a slight  
873 increase in  $V_G/V_L$ . Bubble growth by some combination of diffusion and decompression leads  
874 to an increase in  $V_G/V_L$  at constant  $N_V$ .  $N_V$  decreases while  $V_G/V_L$  increases during bubble  
875 coalescence, whereas loss of bubbles via collapse or buoyant rise leads to a reduction in both  
876 parameters. Intermediate trends on the diagram reflect combinations of more than one of these  
877 processes. The pumice and the scoria from the Main Vent of PdF show the highest  $V_G/V_L$ , but  
878 also the highest  $N_V$ , suggesting preservation of small vesicles and growth by some  
879 combination of diffusion and decompression. The presence of the small vesicles confirms that  
880 the weak PdF activity leads to only limited post-fragmentation expansion inside the hot  
881 portions of the short-lived fountains. These data contrast with the data from the more  
882 energetic fountaining events observed at Kilauea or elsewhere, where pre-eruptive  
883 information is basically erased because pumice textures are dominated by expansion effects  
884 due to their longer permanence within the long-lived ~~energetic~~ fountaining. In contrast, the  
885 densest, spiny scoriae and the scoria from the Fractures activity show the lowest values of  $N_V$   
886 and  $V_G/V_L$ , due to incipient coalescence and/or loose/lack of small bubbles.

887 According to previous works (listed above), the golden pumice of PdF should be  
888 derived from the central part of the fountains, but they do not show the strong post expansion  
889 signatures reported in the literature (Fig. 11). It is interesting to note that the fluidal fragments  
890 at the Main Vent are less smooth (Fig. 4), more vesiculated, and have a lower content of  
891 isolated vesicles than the fluidal scoria from the uppermost Fractures (Fig. 6). Therefore  
892 fluidal fragments at the 2014 Main Vent could indeed represent clasts that have been partly  
893 modified during their residence in the external part of the fountains, while the golden samples  
894 could come from the central part (Stovall et al., 2011 and 2012). However, the slight

Mis en forme : Retrait : Première ligne  
: 1,25 cm

895 differences in crystallinity and glass chemistry between the fluidal and golden fragments  
896 support the idea that each of these fragments has an imprint from the pre-fragmentation  
897 setting. In contrast, the spiny fragments from the Main Vent and the fluidal fragments from  
898 the Fractures show low  $N_V$  and low  $V_G/V_L$  in agreement with loss of vesicles and coalescence.  
899 However, the presence of large numbers of isolated vesicles within the fluidal scoria from the  
900 Fractures agrees with their provenance from a fast hot ejection of relatively degassed magma  
901 (low  $N_V$ ). In contrast the spiny fragments, especially because of the presence of abundant  
902 mesocrysts and increase in syneruptive microcrysts, are indicative of the slowest ascent  
903 velocity and extensively degassing and cooled magma. The spiny fragments are the most  
904 degassed, densest and the most crystal rich magma that was emitted during low-energy  
905 activity by Strombolian explosion, where recycling phenomena were also very frequent (Fig.  
906 2f).

907 Our findings are in full agreement with the recent review of Colombier et al. (2017b).  
908 According to these authors, connectivity values can be used as a useful tool to discriminate  
909 between the basaltic scoria from Hawaiian (fire fountaining) and Strombolian activity. The  
910 broad range in connectivity for pumice and scoria from fire fountaining is interpreted simply  
911 as being due to variations in the time available before quenching due to differences in location  
912 and residence time inside the fountain. The fluidal fragments from the Western Fractures are  
913 the richest in isolated vesicles because they are transported by very short lived hot lava jets. In  
914 contrast, the higher connectivity observed in scoria from Strombolian activity is probably  
915 related to their higher average crystallinity, and more extensive degassing prior to the  
916 eruption, (Colombier et al., 2017b). The spiny surface of these Strombolian fragments is due  
917 to the fact that these weak explosions emit only a small solid mass fraction and the partially  
918 quenched dense clasts land quickly after a short cooling path through the surrounding  
919 atmosphere (e.g. Bombrun et al., 2015).

920 All the clast, from golden to spiny, are very permeable, independent on their  
921 vesicularity, crystal content and/or of the presence of isolated vesicles. This is in agreement  
922 with our interpretation that magma degasses during its ascent in the conduit and that promotes  
923 microlite nucleation (see the sodic plagioclase, Fig. 10a) before magma fragmentation (see  
924 also Di Muro et al. 2015 with the Pele's hairs ad tears samples for the three 2008 eruptions).  
925 Moreover, we always find that some of the spiny clasts (especially the opaque ones) are  
926 slightly less permeable than the golden and fluidal ones, but not as impermeable as we would  
927 expect by their low vesicularity.

928 In conclusion, we can state that i) the crystals lower the percolation threshold and  
929 stabilize permeable pathways and ii) this is true for the syn-eruptive sodic plagioclase that  
930 favor an efficient degassing in the relatively crystal-rich magma, because of their low wet  
931 angles that favor degassing against nucleation (Shea, 2017) and their aspect ratio (e.g. Spina  
932 et al. 2016) iii) therefore permeability develops during vesiculation through bubble  
933 coalescence, which allows efficient volatile transport through connected pathways and  
934 relieves overpressure (Lindoo et al., 2017). Pervasive crystal networks also deform bubbles  
935 and therefore enhance outgassing (Oppenheimer et al., 2015). Based on Saar et al. (2001)  
936 crystals should start to affect the behavior of the exsolved volatile phase when they approach  
937 20 vol% (Lindoo et al., 2017). In our dataset, apart from the golden and part of fluidal, all the  
938 other clasts do have microlites >20%. Our data completely ~~agreesupport~~ that slow  
939 decompression rate allows more time for degassing-induced crystallization, which lowers the  
940 vesicularity ~~threshold~~ at which bubbles ~~start to connect~~.

941 Rapid re-annealing of pore throats between connected bubbles can happen due to short  
942 melt relaxation times (Lindoo et al; 2016). This phenomenology ~~can~~could explain the high  
943 amount of isolated vesicles in the fountaining samples. However, ~~if you look at the~~ vesicle  
944 distributions of the golden and fluidal fragments, ~~they~~ are almost perfect Gaussian curves, so  
945 it seems that if the relaxation process happens it just merged perfectly with the expected  
946 vesicle distribution. In contrast, coalescence and/or expansion (as we observe in the spiny  
947 fragments) do not fit the curves (Fig. 4). In addition, we should expect that in crystal-poor  
948 fragments, due to melt ~~ingrelaxings~~ and pathways closure, the clasts became impermeable  
949 after quenching, as revealed by some petrological experiments performed on crystal-poor  
950 basaltic magma (Lindoo et al., 2016). In contrast, in high crystalline magmas, the presence of  
951 micro-crystals increases viscosity ~~thus~~ preserving the coalesced textures (see Moitra et al.,  
952 2013). The isolated vesicle-rich fragments of the 2014 PdF eruption are highly permeable, and  
953 are characterized by variable ~~ranges~~ of porosity and numbers of vesicles (Fig.4 and Fig. 6d)  
954 that seem more related to the pre-eruptive conditions than to the post relaxation ~~phenomenon~~  
955 of low-~~viscosityus~~ ~~magmaselts~~. In the 2014 crystal-poor samples, the permeability increases  
956 rapidly once the percolation threshold has been reached, and efficient degassing prevents  
957 bubble volumes from expanding past the percolation threshold (Rust and Cashman 2011). -  
958 ~~Degassing-driven-driven~~our ~~datasettooccurrence~~Textural and petrological data demonstrate  
959 that the initial activity emitted~~very~~ was(spiny clastst; lava). Lava flows representemitted in  
960 the 2014 eruptionMicrophenocrysts areand . Their composition indicate that~~ed~~during melt  
961 degassing Most important,during magma cooling and early eruptedof the reservoir either or

962 ~~that this melt was expelled from the crystal-rich portion of the reservoir. Water exsolution~~  
963 ~~from the melt can result from its extensive crystallization, which induces an increase in~~  
964 ~~dissolved volatile content, up to saturation (second boiling) and can drive melt-crystal~~  
965 ~~separation.~~

### 966 **5.43 Integration between the physical and textural characteristics of the products and** 967 **their geochemical signature: insight into the feeding system**

968 According to Peltier et al. (2016), the June 2014 eruption emitted magma from a shallow  
969 pressurized source located only 1.4-1.7 km below the volcano summit. Coppola et al. (2017)  
970 suggest that the 2014 event was fed by a single shallow and small volume magma pocket  
971 stored in the uppermost part of the PdF central plumbing system. All 2014 clasts show  
972 homogeneous and evolved bulk compositions, irrespective of their textural features. June  
973 2014 products are among the most evolved products erupted since at least 1998 and are  
974 moderately evolved with respect to those emitted in 2010, just before the 2010-2014  
975 quiescence. Bulk rock and melt inclusion data suggest that the 2014 evolved magma can be  
976 produced by crystal fractionation during the long lasting (4.6 years) storage and cooling of the  
977 magma injected and partly erupted in November 2009. The different types of scoria and  
978 pumice emitted in 2014 show significant variations in glass composition (Fig. 8b) due to  
979 variable degrees of micro-crystallization. In theory, microlites—microcrysts and  
980 microphenocrysts can reflect late stage (during magma ascent and post-fragmentation)  
981 crystallization. In this case, their variable amount within, for instance, the glassy and opaque  
982 parts of the spiny scoria might reflect slower ascent velocity or longer residence time in the  
983 system (e.g. Hammer et al., 1999, Stovall et al., 2012; Gurioli et al., 2014) in agreement also  
984 with the vesicle signature. However, the four typologies of clasts differ also in terms of  
985 mesocryst content (from rare to 5 vol% for the golden and fluidal and 14-23 vol% for the  
986 glassy spiny and spiny opaque, respectively). Equilibrium plagioclase-melt pairs record an  
987 almost constant and moderate dissolved water content, intermediate between that expected for  
988 melts sitting in the main shallow reservoir (located close to sea level) and the degassed matrix  
989 of lavas. Dissolved water contents are thus consistent with pre-eruptive magma water  
990 degassing during its storage at shallow level, as suggested by geophysical data, and suggest  
991 that the plagioclase mesocrysts and some of the microlites in the spiny scoria and in the lava  
992 grew during magma storage. Melt composition records a potential pre-eruptive thermal  
993 gradient of ~30 °C between the hotter (pumice and fluidal) and the cooler (spiny) magma.

994 Tait et al. (1989) suggest that magma evolution can lead to oversaturation of volatile  
995 species within a shallow reservoir and trigger a volcanic eruption. At PdF, the golden and the  
996 fluidal clasts might represent the portion of magma ~~sitting in the~~located at the top of the  
997 shallow reservoir and ~~accumulating-enriched in~~ bubbles of water rich fluids, released by the  
998 cooler, more crystallized and more degassed “spiny-lava” magma (Fig. 10b). The small  
999 volume of magma, its constant bulk composition and the very small inflation recorded prior to  
1000 the eruption (Fig. 1d) could be consistent with an internal source of over-pressure related to  
1001 volatile exsolution. Larger inflation rates over a broader area are expected when shallow  
1002 reservoir pressurization is related to a new magma input from a deeper source. Slight baseline  
1003 extensions both on distal and proximal sites suggest that magma transfer towards shallower  
1004 crustal levels started short before (11 days) the final magma eruption. Geochemical data do  
1005 not support the occurrence of a new magma input in the degassed and cooled 2014 reservoir.  
1006 We can thus speculate that stress field change related to progressive deep magma transfer has  
1007 promoted volatile exsolution, melt-crystal separation and melt expansion in the shallow  
1008 reservoir. Textural heterogeneity of the 2014 products partly reflects a pre-eruptive ~~thermal~~  
1009 physical gradient recorded by the variability in crystal and bubble contents in the shallow  
1010 reservoir feeding this eruption. The golden and fluidal fragments are the bubble richer and  
1011 hotter portion of the melt. The spiny fragments are the degassed and cooler portion of the  
1012 reservoir, whose progressive tapping led to a decrease in explosive intensity (from fountaining  
1013 to Strombolian activity). Our results are also consistent with processes of mechanical  
1014 reservoirs/dyke stratification, as ~~already~~ observed ~~experimentally~~ by Menand and Phillips  
1015 (2007). ~~The golden and fluidal fragments are the bubble richer and hotter portion of the melt.~~  
1016 ~~The spiny fragments are the degassed and cooler portion of the reservoir, whose progressive~~  
1017 ~~tapping led to a decrease in explosive intensity (from fountaining to Strombolian activity).~~ As  
1018 explained earlier, this process is magma ascent promoted enhanced by syneruptive degassing  
1019 induced crystallization. The spiny opaque clasts can be considered as being recycled material  
1020 that fell back into the system. Accumulation of olivine crystals out of equilibrium with the  
1021 host magma produces minor variations in ~~mesopheno~~cryst contents as observed within the  
1022 same type of clasts sampled at different times/locations during the eruption, with the scoria  
1023 from the Western Fracture and early erupted lava being the ones with the lowest amount of  
1024 olivine (Table S4 and Fig. 7b). Again, this temporal variation supports an ~~slight~~ increase in  
1025 large heavy crystals within the most degassed magma emitted toward the end of activity, ~~as~~  
1026 ~~observed as a general trend at PdF (Peltier et al., 2009)~~ further suggesting that it correspond to  
1027 the lower part of the reservoir.

1028  
1029  
1030  
1031  
1032  
1033  
1034  
1035  
1036  
1037  
1038  
1039  
1040  
1041  
1042  
1043  
1044  
1045  
1046  
1047  
1048  
1049  
1050  
1051  
1052  
1053  
1054  
1055  
1056  
1057  
1058  
1059  
1060

~~Melt inclusion results allow us to confirm the involvement of a single and only slightly heterogeneous magma source in 2014, possibly related to cooling and fractional crystallisation of an older magma batch (November 2009). Interestingly, this latter short lived summit eruption was also characterized by the same large range of pyroclastic products in spite of the less evolved magmatic composition. The main difference with respect to 2014 is that the 2009 products contain a slightly larger amount of mm-sized olivine macrocrysts in the lava, scoria and pumice. This suggests that bubble accumulation and source pressurisation is mostly controlled by the shallow storage depth, which allows water exsolution (Di Muro et al., 2016), rather than by a trend of magma cooling and evolution (Tait et al., 1989).~~

Our dataset permits us to propose that the 2014 eruption was fed by a physically zoned magma reservoir with the lighter crystal-poor bubble-rich magma erupted first (and possibly located in the upper part of the storage system) that ascends faster and feed the more energetic phase, the fountaining. This lighter magma is not more evolved than the spiny one (same bulk compositions) and it is not necessarily richer in dissolved volatile amounts; it is just poorer in crystal and richer in bubbles. ~~We conclude that the s~~Second boiling, possibly triggered a few days before the eruption by stress field change, is responsible of the extraction of bubble rich melt from a crystal-rich network. This last one will represent the main volume of erupted lava. Fast ascent of the foam hinders its crystallization and preserve high number of vesicles, high vesicularity and it is only little modified by post-fragmentation expansion. Decrease in initial overpressure translates in a progressive decrease in magma ascent rate and output rate (e.g. Coppola et al., 2017 and references therein). Nucleation of microcrysts is enhanced in melt ascending with lower speed and is mostly related to syneruptive degassing (for the spiny).

The larger volume (dense lava) corresponds to crystallized and less vesiculated magma which experiences a slow ascent in the dyke and even further micro-crystallisation during its subaerial emplacement.

Melt inclusion results allow us to confirm the involvement of a single and only slightly heterogeneous magma source in 2014, related to cooling and fractional crystallisation of an older magma batch (November 2009). Interestingly, this latter short lived summit eruption was also characterized by the same large range of pyroclastic products found in 2014 in spite of its mafic -composition.



1061 This suggests that bubble accumulation and source pressurisation is highly dependent  
1062 on the shallow storage depth, which facilitates rapid water exsolution (Di Muro et al., 2016),  
1063 and it is not necessarily the outcome of slow magma cooling and differentiation (Tait et al.,  
1064 1989).

## 1067 **6. Proposed model for the 2014 eruption and c**Conclusions

1068  
1069 In this paper we show that ~~a combination of~~ textural and petro-chemical ~~quantification study~~  
1070 of the eruptive products can be used to characterize the on-going activity at PdF and ~~to~~  
1071 ~~provide valuable information to understand both the~~ ~~constrain both the~~ ~~causes trigger~~ and ~~the~~  
1072 ~~dynamics evolution~~ of ~~these very~~ short-lived and small-volume eruptions. ~~This approach~~  
1073 ~~resulted extremely valuable in i) understanding processes that leading to an eruption which~~  
1074 ~~was preceded by short-lived and elusive precursors, -and ii) into reconstructing the time~~  
1075 ~~evolution of eruptive dynamics in an -, when the geophysical precurs alone are not so strong~~  
1076 ~~and/or immediately detectable and when the eruption is with poor direct not visually~~  
1077 ~~documented observation.~~

1078 ~~The June 2014 summit eruption occurred after a relatively long phase of quiescence~~  
1079 ~~(4.6 years) and was preceded by only a few days of weak and short geophysical seismic,~~  
1080 ~~geodetic and geochemical precursors (Peltier et al., 2016 and Fig. 1d). This multidisciplinary~~  
1081 ~~approach provides new constraints on the mechanisms triggering such short lived, small but~~  
1082 ~~potentially hazardous eruptions (STIAMO RIPETENDO TRE VOLTE GLI STESSI~~  
1083 ~~CONCETTI. RIASSUMI E TAGLIA). Following the sketch in Figure 12, we suppose infer~~  
1084 ~~that residual magma from the 2009 eruption was sitting ponding at shallow levels experienced~~  
1085 ~~long-lasting eoling cooling and crystallization (Fig. 12a). During the inflation period~~  
1086 ~~(b) Between 2010 and 2014 the volcano progressively deflated, -(Fig. 12b) possibly because of~~  
1087 ~~magma degassing and cooling, facilitated by the shallow depth of the reservoir, itself allows~~  
1088 ~~exsolution, and magma with crystallization in situ of the During this phase mesocrysts and~~  
1089 ~~some microlites crystals formed, as observed in the lava sample (Figs. 4e and Fig. 10a). This~~  
1090 ~~process favours a physical zonation of the shallow reservoir. Therefore, magma storage at~~  
1091 ~~shallow depth favours volatile (mostly H<sub>2</sub>O) exsolution at several steps during magma~~  
1092 ~~ponding, cooling and evolution (Fig. 12b).~~

1093 The occurrence of deep (>10 km bsl) lateral magma transfer since March-April 2014  
1094 has been inferred by Boudoire et al., (2017) on the basis of deep (mantle level) seismic  
1095 swarms and increase in soil CO<sub>2</sub> emissions on the distal western volcano flank. The incipit of  
1096 magma transfer towards shallower crustal levels is potentially recorded by subtle volcano  
1097 inflation about 11 days before the June 2014 eruptions (Figs. 1d and 12c). We suspect that  
1098 these deep processes can have progressively modified the shallower crustal stress field and  
1099 favoured magma vesiculation and melt-crystal separation. Second boiling could thus  
1100 have over-pressured the shallow seated reservoir and triggered magma ascent and eruption  
1101 trigger (Fig. 12c).

1102 Without this deep external magma transfers inputs we believe that the little small  
1103 reservoir reactivated in 2014 would have evolved cooled down completely to form in an  
1104 intrusion (see as suggested by the pervasive crystallization of the lava, one of the densest  
1105 emitted from 2014 to 2017). The occurrence of deep (>10 km bsl) lateral magma transfer  
1106 since March-April 2014 has been inferred by Boudoire et al., (2017) on the basis of deep  
1107 (mantle level) seismic swarms and soil CO<sub>2</sub> emissions on the distal western volcano flank.  
1108 We suspect that these deep processes can have modified the shallower crustal stress field and  
1109 favoured magma vesiculation and eruption trigger (Fig. 12c). The 2014 event represented  
1110 stead instead the first of a long series of eruptions, whose magmas became progressively  
1111 less evolved in time (Coppola et al., 2017). In this scenario the trigger mechanisms of 2014  
1112 activity are both internal and external in the sense that the little small shallow reservoir hosting  
1113 cooled magmas was mature enough (due to crystallization and cooling) permitted to create the  
1114 conditions favourable to a second boiling (Fig. 12c, and Tait et al., 1989). The second boiling  
1115 was likely trigger by an almost undetectable stress field change, because of the physical  
1116 zonation of a mature shallow reservoir and was favoured by the shallow storage pressure of  
1117 the magma (Fig. 12c) that promotes fast water exsolution and rapid magma response to  
1118 external triggers. The second boiling was possibly contributed to than responsible for the  
1119 inflation registered 11 days before the eruption at 1.4-1.7 km (Fig. 12c) both by magma  
1120 expansion and heat transfer of hot fluids to the hydrothermal system (Lénat et al., 2011). -  
1121 Only the summit cone was affected by short-scale and weak inflation, which has been  
1122 attributed to pressurization of a very shallow magmatic source (ca. 1.4-1.7 km below volcano  
1123 summit) by Peltier et al. (2016).

1124 In this scenario we Our data permit to exclude (i) new magma input and/or to fluid inputs  
1125 (CO<sub>2</sub>-rich fluids) from deep magmatic levels to trigger the June 2014 eruption. We also  
1126 exclude (ii) heating and enhanced convection of the shallow magma reservoir (due to

1127 ~~energy/heat diffusion/transfer without fluid or mass transfer), because this process is very slow~~  
1128 ~~because of slow heat diffusion.~~ Furthermore, ~~The and-2014~~ minerals do not record evidences  
1129 ~~of slow-magma heating.~~ We can exclude equally ~~that~~ (iii) deformation of the volcanic edifice  
1130 ~~and decompression of the magma reservoir and/or hydrothermal system due to flank sliding~~  
1131 ~~because geodetic data show no evidence of flank sliding able to produce decompression/stress~~  
1132 ~~change in of-the hydrothermal and magmatic system. Geochemical (bulk rock) and~~  
1133 ~~petrological (mineral composition and zoning) data, permit to exclude this hypothesis. The~~  
1134 ~~magma erupted in 2014 results to be one of the most evolved and cold magmas ever erupted~~  
1135 ~~at Piton de la Fournaise (Figs 8 and 10b); it is very homogeneous (Fig. 7), minerals do not~~  
1136 ~~exhibit reverse zoning and their compositional evolution from phenocrysts to microlites~~  
1137 ~~record magma cooling and final degassing (new Figure 10a).~~ Geophysical and geochemical  
1138 data have permitted to track vertical magma and fluid transfer below the volcano summit in  
1139 April 2015, that is about one year after the early deep lateral magma transfer (Peltier et al.,  
1140 2016). Deep processes ~~cannot be~~ difficult to ~~detected by the OVPF geodetical detect for~~  
1141 ~~any monitoring network.~~

1142  
1143 ~~We conclude that the overpressure, caused by the second boiling, triggered the The 11~~  
1144 ~~days of weak summit volcano inflation, which preceded the 2014 eruption, possibly result~~  
1145 ~~from volatile exsolution and expansion of both the shallow magma reservoir and the~~  
1146 ~~hydrothermal system (Fig. 12c). We also exclude (ii) heating and enhanced convection of the~~  
1147 ~~shallow magma reservoir (due to energy transfer without fluid or mass transfer, because~~  
1148 ~~rocess is very slow because of slow heat diffusion and 2014 minerals do not record evidences~~  
1149 ~~of slow magma heating. We can exclude equally (iii) deformation of the volcanic edifice and~~  
1150 ~~decompression of the magma reservoir and/or hydrothermal system due to flank sliding~~  
1151 ~~because geodetic data show no evidence of flank sliding able to produce decompression of the~~  
1152 ~~hydrothermal and magmatic system. However, it is necessary to discuss the pressurisation~~  
1153 ~~(volcano inflation) and/or depressurization (volcano deflation) of the (iv) hydrothermal~~  
1154 ~~system located between the Dolomieu crater and the roof of the shallow magma reservoir~~  
1155 ~~(Fig. 12c) as a possible eruption trigger, as suggested by Lénat et al. (2011). Expansion of the~~  
1156 ~~hydrothermal system is due to inputs of heat and fluids from the magma reservoir or deeper~~  
1157 ~~and pressurization is favored by its sealing (because of mineral precipitation; lava~~  
1158 ~~accumulation at the volcano top). Related to this point, Froger et al., (2015) suggest that PdF~~  
1159 ~~hydrothermal system (and its potential sealing as well) was largely disrupted during the 2007~~  
1160 ~~caldera collapse. In Lénat's model, thermal expansion of heated geothermal fluids induce rock~~

1161 ~~fracturing by pore pressure increase. Hydrothermal fracturing would cause transient~~  
1162 ~~decompression of the magma reservoir, thus triggering vesiculation and starting magma~~  
1163 ~~ascent process. However, we found no evidences of new inputs of magma or fluids in the~~  
1164 ~~2014 reservoir, that would have induced the pressurization of the hydrothermal system.~~  
1165 ~~So, in our model the combination of change of stress field (deep input) and the physical~~  
1166 ~~zonation of the shallow magma reservoir promote the second boiling that enhanced the foam~~  
1167 ~~accumulation. Our dataset permits us to propose that the 2014 eruption was fed by a~~  
1168 ~~physically zoned magma reservoir with the lighter crystal poor magma erupted first (and~~  
1169 ~~possibly located in the upper part of the storage system) that ascends faster and feed the more~~  
1170 ~~energetic phase, the fountaining (Fig. 12d). This lighter magma is not more evolved than the~~  
1171 ~~spiny one (same bulk compositions) and it is not necessarily richer in dissolved volatile~~  
1172 ~~amounts; it is just poor in crystal. We conclude that the second boiling is responsible of the~~  
1173 ~~extraction of bubble rich melt from a crystal rich network. This last one will represent the~~  
1174 ~~main volume of erupted lava. eEruption. The occurrence of a hydrous almost pure melt at~~  
1175 ~~shallow depth permitted its fast vesiculation upon ascent towards the surface. -In turn, fast~~  
1176 ~~ascent of the foam (Fig. 12d) hindered its crystallization and preserved high number of~~  
1177 ~~vesicles, high vesicularity and it is only little modified by post fragmentation expansion.~~  
1178 ~~Decrease in initial overpressure translated in a progressive decrease in magma ascent rate and~~  
1179 ~~output rate (e.g. Coppola et al., 2017 and references therein) and a temporal transition from~~  
1180 ~~Hawaiian activity to Strombolian activity (Fig. 12 d). Nucleation of microcrysts was enhanced~~  
1181 ~~in melt ascending with lower speed and in turn this syn-eruptive crystallization -favoured~~  
1182 ~~bubble connectivity/permeability in the ascending magma, even for magma at low~~  
1183 ~~vesicularity and was mostly controlled by syneruptive degassing. The larger volume (dense~~  
1184 ~~lava) corresponds to highly-crystallized and degassed magma already in the reservoir, and~~  
1185 ~~experienced a slower ascent in the dyke and even further micro-crystallisation during its~~  
1186 ~~subaerial emplacement.~~  
1187 ~~The texture of the products allowed us to follow the dynamic evolution of the system~~  
1188 ~~in space, (from smooth fluidal scoria emitted from rapid jet of lava fromat the fractures, to a~~  
1189 ~~more stable activity at the Main V+ent, and in time. At the Main Vent, in fact, we observed the~~  
1190 ~~transition ) and in time, at the Main vent (fromfrom the golden and fluidal fragments emitted~~  
1191 ~~from Hawaiian fountaining, at the peak of the intensity of the eruption, to the spiny fragments,~~  
1192 ~~emitted from a declining Strombolian activity at the end of the eruption.)Syn-eruptive~~  
1193 ~~degassing is favored by bubble connectivity/permeability in the ascending magma, enhanced~~

1194 ~~by syn-eruptive crystallisation in the conduit (especially microcrysts of plg), even for magma~~  
1195 ~~at low vesicularity.~~

1196 Therefore we here show for the first time that short lived and weak Hawaiian  
1197 fountaining and Strombolian events can preserve pyroclast textures that can be considered as  
1198 ~~representing~~ a valid approximation to magma ascent and fragmentation conditions before the  
1199 explosions and correlate to the eruptive dynamics as well.

1200  
1201 ~~First, we found that this kind of eruption can be triggered solely by bubble~~  
1202 ~~accumulation and source pressurisation at a very shallow storage depth. We suggest that it is~~  
1203 ~~the shallow depth of the reservoir itself that allows exsolution, rather than magma cooling and~~  
1204 ~~evolution or recharge from a deep source. Second, these small, summit eruptions are usually~~  
1205 ~~related to small pockets of magma left behind following previous eruptions. Third, the~~  
1206 ~~thermal mechanical stratification at the reservoir level between the bubble rich portion and~~  
1207 ~~the more degassed and cooler one modulates the style of the explosions. Therefore, in terms~~  
1208 ~~of ascent and degassing history of the magma the golden and fluidal fragments represent the~~  
1209 ~~bubble richer and hotter portion of the melt with faster ascent rate, while the spiny fragments~~  
1210 ~~are the degassed, cooler portion of the reservoir, whose progressive tapping lead to a decrease~~  
1211 ~~in explosive intensity (from fountaining to Strombolian activity). Finally, an accumulation of~~  
1212 ~~olivine crystals out of equilibrium with the host magma produces minor variations in~~  
1213 ~~phenocryst contents with a slight increase in heavy crystals within the most degassed magma~~  
1214 ~~emitted toward the end of activity, as observed as a general trend at PdF (Peltier et al., 2009).~~

1215 To conclude, these results highlight the importance of petrological monitoring, which  
1216 can provide complementary information regarding the ongoing volcanic activity –to other  
1217 geophysical and geochemical monitoring tools commonly used on volcanoes.

## 1218 Acknowledgements

1219 OVPF team and T. Lecocq for monitoring and fieldwork. F. van Wyk de Vries provided an  
1220 English revision for the proof. We thank the STRAP project funded by the Agence Nationale  
1221 de la Recherche (ANR-14-CE03-0004-04). This research was partly financed by the French  
1222 Government Laboratory of Excellence initiative no. ANR-10-LABX-0006, the Région  
1223 Auvergne, and the European Regional Development Fund. This is Laboratory of Excellence  
1224 Clervolc contribution number XXXX

1225

1226 **References list**

- 1227 Albarède, F., and V. Tamagnan (1988), Modelling the recent geochemical evolution of the  
1228 Piton de la Fournaise volcano, Réunion island, 1931-1986, *J. Petrol.*, *29*, 997-1030.
- 1229 Albarède, F., B. Luais, G. Fitton, M.P. Semet, E. Kaminski, B.G.J Upton, P. Bachèlery, and  
1230 J.L. Cheminée (1997), The geo-chemical regimes of Piton de la Fournaise Volcano Réunion.  
1231 during the last 530,000 years, *J. Petrol.*, *38*, 171–201.
- 1232 Andronico, D., M.D. Lo Castro, M. Sciotto, and L. Spina (2013a), The 2010 ash emissions at  
1233 the summit craters of Mt Etna: relationship with seismo-acoustic signals, *J. Geophys. Res.*,  
1234 *118*, 51–70, doi:10.1029/2012JB009895.
- 1235 Andronico, D., J. Taddeucci, A. Cristaldi, L. Miraglia, P. Scarlato, and M. Gaeta (2013b), The  
1236 15 March 2007 paroxysm of Stromboli: video-image analysis, and textural and compositional  
1237 features of the erupted deposit, *Bull. Volcanol.*, *75*, 733, doi:10.1007/s00445-013-0733-2.
- 1238 Andronico, D., S. Scollo, M.D. Lo Castro, A. Cristaldi, L. Lodato, and J. Taddeucci (2014),  
1239 Eruption dynamics and tephra dispersal from the 24 November 2006 paroxysm at South-East  
1240 Crater, Mt Etna, Italy, *J. Volcanol. Geotherm. Res.*, *274*, 78–91,  
1241 doi:10.1016/j.jvolgeores.2014.01.009.
- 1242 Bachèlery, P., J.F. Lénat, A. Di Muro, and L. Michon (2016), Active Volcanoes of the  
1243 Southwest Indian Ocean: Piton de la Fournaise and Karthala. *Active Volcanoes of the World*.  
1244 Springer-Verlag, Berlin and Heidelberg, 1-428, DOI 10.1007/978-3-642-31395-0\_12.
- 1245 Boivin, P., and P. Bachèlery (2009), Petrology of 1977 to 1998 eruptions of Piton de la  
1246 Fournaise, La Réunion Island, *J. Volcanol. Geotherm. Res.*, *184*, 109–125.
- 1247 [Bombrun, M., A. Harris, L. Gurioli, J. Battaglia and V. Barra \(2015\), Anatomy of a](#)  
1248 [strombolian eruption: inferences from particle data recorded with thermal video, \*J. Geophys.\*](#)  
1249 [Res., \*120\*\(4\):2367-2387. DOI.10.1002/2014BO11556.](#)
- 1250 Boudoire, G., M. Liuzzo, A. Di Muro, V. Ferrazzini, L. Michon, F. Grassa, A. Derrien, N.  
1251 Villeneuve, A. Bourdeu, C. Brunet, G. Giudice, and S. Gurrieri (2017), Investigating the  
1252 deepest part of a volcano plumbing system: evidence for an active magma path below the  
1253 western flank of Piton de la Fournaise (La Réunion Island), *J. Volcanol. Geotherm. Res.*, doi:  
1254 10.1016/j.jvolgeores.2017.05.026.

1255 Brenguier, F., P. Kowalski, T. Staudacher, V. Ferrazzini, F. Lauret, P. Boissier, A. Lemarchand,  
1256 C. Pequegnat, O. Meric, C. Pardo, A. Peltier, S. Tait, N.M. Shapiro, M. Campillo, and A. Di  
1257 Muro (2012), First Results from the UnderVolc High Resolution Seismic and GPS network  
1258 deployed on Piton de la Fournaise Volcano, *Seismo. Res. Lett.* 83(7),  
1259 doi:10.1785/gssrl.83.1.97.

1260 Brugier, Y.A. (2016), Magmatologie du Piton de la Fournaise (Ile de la Réunion): approche  
1261 volcanologique, pétrologique et expérimentale. Sciences de la Terre. Université d'Orléans,  
1262 NNT: 2016ORLE2007, pp. 251.

1263 Bureau, H., F. Pineau, N. Métrich, P.M. Semet, and M. Javoy (1998a), A melt and fluid  
1264 inclusion study of the gas phase at Piton de la Fournaise volcano (Reunion Island), *Chem.*  
1265 *Geol.* 147, 115–130.

1266 Bureau, H., N. Métrich, F. Pineau, and M.P. Semet (1998b), Magma-conduit interaction at  
1267 Piton de la Fournaise volcano (Réunion Island): a melt and fluid inclusion study, *J. Volcanol.*  
1268 *Geotherm. Res.* 84, 39–60.

1269 Carey, R.J., M. Manga, W. Degruyter, D. Swanson, B. Houghton, T. Orr, and M. Patrick  
1270 (2012), Externally triggered renewed bubble nucleation in basaltic magma: the 12 October  
1271 2008 eruption at Halema'uma'u Overlook vent, Kīlauea, Hawai'i, USA, *J. Geophys. Res.*,  
1272 117, B11202. doi:10.1029/2012JB009496.

1273 Carey, R.J., M. Manga, W. Degruyter, H. Gonnermann, D. Swanson D, B. Houghton, T. Orr,  
1274 and M. Patrick (2013), Convection in a volcanic conduit recorded by bubbles, *Geology*, 41(4),  
1275 395–398.

1276 Cashman, K.V., and M.T. Mangan (1994) Physical aspects of magmatic degassing II:  
1277 constraints on vesiculation processes from textural studies of eruptive products, In: Carroll  
1278 MR, Holloway JR (eds) Volatiles in magmas, Reviews in mineralogy. *Miner. Soc. Am.*,  
1279 Fredricksberg, pp 447–478.

1280 Clocchiatti, R., A. Havette, and P. Nativel (1979), Relations pétrogénétiques entre les basaltes  
1281 transitionnels et les océanites du Piton de la Fournaise (Ile de la Réunion, océan Indien) à  
1282 partir e la composition chimique des inclusions vitreuses des olivines et des spinelles, *Bull.*  
1283 *Minér.*, 102, 511–525.

- 1284 Colombier, M., L. Gurioli, T.H. Druitt, T. Shea, P. Boivin, D. Miallier, and N. Cluzel (2017a),  
1285 Textural evolution of magma during the 9.4-ka trachytic explosive eruption at Kilian Volcano,  
1286 Chaîne des Puys, France, *Bull. Volcanol.*, 79(2), 1-24. doi:10.1007/s00445-017-1099-7.
- 1287 Colombier, M., F.B. Wadsworth, L. Gurioli, B. Scheu, U. Kueppers, A. Di Muro, and D.B.  
1288 Dingwel (2017b), The evolution of pore connectivity in volcanic rocks, *Earth Planet. Sci.*  
1289 *Lett.*, 462, 99-109. DOI: 10.1016/j.epsl.2017.01.011.
- 1290 Colò, L., M. Ripepe, D.R. Baker, and M. Polacci (2010), Magma vesiculation and infrasonic  
1291 activity at Stromboli open conduit volcano, *Earth Planet. Sc. Lett.* 292(3–4):274–280.
- 1292 Coppola, D., N. Villeneuve, A. Di Muro, V. Ferrazzini, A. Peltier, M. Favalli, P. Bachèlery, L.  
1293 Gurioli, A. Harris, S. Moune, I. Vlastélic, B. Galle, S. Arellano, and A. Aiuppa (2017), A  
1294 Shallow system rejuvenation and magma discharge trends at Piton de la Fournaise volcano  
1295 (La Réunion Island), *Earth Planet. Sci. Lett.* 463, 13-24.
- 1296 Corsaro, R., and L. Miraglia (2014), The transition from summit to flank activity at Mt. Etna,  
1297 Sicily (Italy): Inferences from the petrology of products erupted in 2007–2009, *J. Volcanol.*  
1298 *Geother. Res.*, 275, 51– 60.
- 1299 Di Muro, A., Métrich, N., Vergani, D., Rosi, M., Armienti, P., Fougeroux, T., Deloule, E.,  
1300 Arienzo, I., Civetta, L. (2014), The shallow plumbing system of Piton de la Fournaise Volcano  
1301 (La Réunion Island, Indian Ocean) revealed by the major 2007 caldera forming eruption, *J.*  
1302 *Petrol.*, 55, 1287-1315.
- 1303 Di Muro, A., T. Staudacher, V. Ferrazzini, N. Métrich, P. Besson, C. Garofalo, and B.  
1304 Villemant (2015), Shallow magma storage at Piton de la Fournaise volcano after 2007 summit  
1305 caldera collapse tracked in Pele’s hairs, chap 9 of Carey, R. J., V. Cayol, M. P. Poland, and D.  
1306 Weis (eds.), Hawaiian Volcanoes: From Source to Surface, *American Geophysical Union*  
1307 *Monograph* 208, pp 189–212, doi:10.1002/9781118872079.ch9.
- 1308 Di Muro, A., N. Métrich, P. Allard, A. Aiuppa, M. Burton, B. Galle, and T. Staudacher (2016),  
1309 Magma degassing at Piton de la Fournaise volcano, Active Volcanoes of the World, series,  
1310 Springer, Bachelery, P., Lenat, J.F, Di Muro, A., Michon L., Editors. Pg. 203-222.
- 1311 [DYNVOLC Database \(2017\) Observatoire de Physique du Globe de Clermont-Ferrand,](#)  
1312 [Aubière, France. DOI:10.25519/DYNVOLC-Database. Online access:](#)  
1313 <http://dx.doi.org/10.25519/DYNVOLC-Database>



1314 Eychenne, J., B.F. Houghton, D.A. Swanson, R.J. Carey, and L. Swavely (2015), Dynamics of  
1315 an open basaltic magma system: the 2008 activity of the Halema'uma'u Overlook vent,  
1316 Kīlauea Caldera. *Earth Planet. Sci. Lett.*, *409*, 49–60.

1317 Famin, V., B. Welsch, S. Okumura, P. Bachèlery, and S. Nakashima (2009), Three  
1318 differentiation stages of a single magma at Piton de la Fournaise (Réunion hotspot). *Geoch.  
1319 Geoph. Geos.* *10*, Q01007. doi:10.1029/2008GC002015.

1320 Fisk, M.R., B.G.J Upton, C.E. Ford, and W.M. White (1988), Geochemical and experimental  
1321 study of the genesis of magmas of Reunion island, Indian Ocean, *J. Geophys. Res.*, *93*, 4933-  
1322 4950.

1323 Formenti, Y, and T.H. Druitt (2003), Vesicle connectivity in pyroclasts and implications for  
1324 the fluidisation of fountain-collapse pyroclastic flows, Montserrat (West Indies), *Earth Planet.  
1325 Sci. Lett.*, *214*, 561–574.

1326 Gardner, J.E., R.M.E. Thomas, C. Jaupart, and S. Tait (1996), Fragmentation of magma  
1327 during Plinian volcanic eruptions, *Bull. Volcanol.*, *58*, 144–162.

1328 Giachetti, T., T.H. Druitt, A. Burgisser, L. Arbaret, and C. Galven (2010), Bubble nucleation  
1329 and growth during the 1997 Vulcanian explosions of Soufrière Hills Volcano, Montserrat, *J.  
1330 Volcanol. Geotherm. Res.*, *193*(3–4):215–231. doi:10.1016/j.jvolgeores.2010.04.001.

1331 Gonnermann, H.M., and M. Manga (2013) Dynamics of magma ascent in the volcanic  
1332 conduit. In: Fagents, S.A., Gregg, T.K.P., Lopes, R.M.C. (Eds.), *Modeling Volcanic Processes:  
1333 The Physics and Mathematics of Volcanism*. Cambridge University Press, Cambridge.

1334 [Gurioli, L., A.J.L. Harris, B.F. Houghton, M. Polacci, and M. Ripepe \(2008\) Textural and  
1335 geophysical characterization of explosive basaltic activity at Villarrica volcano, \*J. Geophys.  
1336 Res.\*, \*113\*, B08206. doi:10.1029/2007JB005328](#)

1337 Gurioli, L., A.J.L. Harris, L. Colo, J. Bernard, M. Favalli, M. Ripepe, and D. Andronico  
1338 (2013), Classification, landing distribution and associated flight parameters for a bomb field  
1339 emplaced during a single major explosion at Stromboli, Italy, *Geology*, *41*, 559-562, DOI  
1340 10.1130/G33967.1.

1341 Gurioli, L., L. Colo', A.J. Bollasina, A.J.L. Harris, A. Whittington, and M. Ripepe (2014),  
1342 Dynamics of strombolian explosions: inferences from inferences from field and laboratory

1343 studies of erupted bombs from Stromboli volcano, *J. Geophys. Res.*, 119(1),  
1344 DOI:10.1002/2013JB010355.

1345 Gurioli, L., D. Andronico, P. Bachelery, H. Balcone-Boissard, J. Battaglia, G. Boudon, A.  
1346 Burgisser, S.B. M.R. Burton, K. Cashman, S. Cichy, R. Cioni, A. Di Muro, L. Dominguez, C.  
1347 D’Oriano, T. Druitt, A.J.L Harris, M. Hort, K. Kelfoun, J.C. Komorowski, U. Kueppers, J.L.  
1348 Le Pennec, T. Menand, R. Paris, L. Pioli, M. Pistolesi, M. Polacci, M. Pompilio, M. Ripepe,  
1349 O. Roche, E. Rose-Koga, A. Rust, L. Scharff, F. Schiavi, R. Sulpizio, J. Taddeucci, and T.  
1350 Thordarson (2015), MeMoVolc consensual document: a review of cross-disciplinary  
1351 approaches to characterizing small explosive magmatic eruptions, *Bull. Volcanol.*, 77, 49.  
1352 DOI: 10.1007/s00445-015-0935-x.

1353 [Hammer, J.E., K.V. Cashman, R.P. Hoblitt, and S. Newman \(1999\) Degassing and microlite](#)  
1354 [crystallization during pre-climactic events of the 1991 eruption of Mt. Pinatubo, Philippines,](#)  
1355 [Bull. Volcanol. 60, 355–380.](#)

1356 [Harris, A.J.L., N. Villeneuve, A. Di Muro, V. Ferrazzini, A. Peltier, D. Coppola, M. Favalli, P.](#)  
1357 [Bachèlery, J.-L. Foger, L. Gurioli, S. Moune, I. Vlastélic, B. Galle, and S. Arellano \(2017\),](#)  
1358 [Effusive Crises at Piton de la Fournaise 2014-2015: A Review of a Multi-National Response](#)  
1359 [Model, Applied Volcanology, 6, 11, DOI 10.1186/s13617-017-0062-9](#)

1360 Helz, R.T., and C.R. Thornber (1987), Geothermometry of Kilauea Iki lava lake, Hawaii, *Bull.*  
1361 *Volcanol.*, 49, 651–668.

1362 Hibert, C, A. Mangeney, M. Polacci, A. Di Muro, S. Vergnolle, V. Ferrazzini, B. Taisne, M.  
1363 Burton, T. Dewez, G. Grandjean, A. Dupont, T. Staudacher, F. Brenguier, N.M. Shapiro, P.  
1364 Kowalski, P. Boissier, P. Catherine, and F. Lauret (2015), Multidisciplinary monitoring of the  
1365 January 2010 eruption of Piton de la Fournaise volcano, La Réunion island, *J. Geophys. Res.*,  
1366 *120(5)*, 3026-3047

1367 [Higgins M.-D. \(2000\). Measurement of crystal size distributions, American Mineralogist, 85,](#)  
1368 [1105-1116.](#)

1369 Houghton, B.F., and C.J.N. Wilson (1989), A vesicularity index for pyroclastic deposits, *Bull.*  
1370 *Volcanol.*, 51, 451–462. doi:10.1007/BF01078811

- 1371 Houghton, B.F., D.A. Swanson, R.J. Carey, J Rausch., and A.J Sutton (2011), Pigeonholing  
1372 pyroclasts, insights from the 19 March 2008 explosive eruption of Kīlauea volcano,  
1373 *Geology*,39, 263–266, doi:10.1130/G31509.1.
- 1374 Houghton, B.F., D.A. Swanson, J. Rausch, R.J. Carey, Fagents S.A., and T.R. Orr (2013),  
1375 Pushing the volcanic explosivity index to its limit and beyond: constraints from exceptionally  
1376 weak explosive eruptions at Kīlauea in 2008, *Geology*, 41(6):627–630
- 1377 Houghton, B.F., J. Taddeucci, D. Andronico, H.M. Gonnermann, M. Pistolesi, M.R. Patrick,  
1378 T.R. Orr, D.A. Swanson, M.Edmonds, D. Gaudin, R.J. Carey and P. Scarlato (2016), Stronger  
1379 or longer: Discriminating between Hawaiian and Strombolian eruption styles, *Geology* doi:  
1380 10.1130/G37423.1
- 1381 [Inman, D.L. \(1952\) Measures for describing the size distribution of sediments, \*J. Sed. Petrol.\*,](#)  
1382 [22, 125–145.](#)
- 1383 Kahl, M., S.Chakraborty, M. Pompilio, and F. Costa (2015), Constraints on the nature and  
1384 evolution of the magma plumbing system of Mt. Etna Volcano (1991–2008) from a combined  
1385 thermodynamic and kinetic modelling of the compositional record of minerals, *J.Petrol.*, 56,  
1386 2025–2068, doi:10.1093/petrology/egv063.
- 1387 Kawabata, E., S.J. Cronin, M.S. Bebbington, M.R.H. Moufti, N. El-Masry, and T. Wang  
1388 (2015), Identifying multiple eruption phases from a compound tephra blanket: an example of  
1389 the AD1256 Al-Madinah eruption, Saudi Arabia, *Bull. Volcanol.*, 77, 6 DOI 10.1007/s00445-  
1390 014-0890-y.
- 1391 Lange, ~~R.A. Jr.~~, H.M. Frey, and J. Hector (2009), A thermodynamic model for the plagioclase-  
1392 liquid hygrometer/thermometer, *Am. Mineral.*, 94, 494–506.
- 1393 Lautze, N., J. Taddeucci, D. Andronico, C. Cannata, L. Tornetta, P. Scarlato, B. Houghton, and  
1394 D. Lo Castro (2012), SEM-based methods for the analysis of basaltic ash from weak  
1395 explosive activity at Etna in 2006 and the 2007 eruptive crisis at Stromboli, *Phys. Chem.*  
1396 *Earth* 45,46, 113–127, doi:10.1016/j.pce.2011.02.001.
- 1397 Leduc, L., L. Gurioli, A.J.L. Harris, L. Colo', and E. Rose-Koga (2015), Types and  
1398 mechanisms of strombolian explosions: characterization of a gas-dominated explosion at  
1399 Stromboli, *Bull. Volcanol.*, 77, 8, DOI: 10.1007/s00445-014-0888-5

1400 Leibrandt, S, and J.L. Le Pennec (2015), Towards fast and routine analyses of volcanic ash  
1401 morphometry for eruption surveillance applications, *J. Volcanol. Geotherm. Res.*, 297, 11–27.

1402 [Lénat, J.-F., P. Bachèlery, and A. Peltier \(2011\), The interplay between collapse structures,](#)  
1403 [hydrothermal systems and magma intrusions: the case of the central area of Piton de la](#)  
1404 [Fournaise volcano, \*Bull. Volc.\* doi:10.1007/s00445-011-0535-3](#)

1405 Lénat, E.F., P.B. Bachelery, and O. Merle (2012), Anatomy of Piton de la Fournaise volcano  
1406 (La Réunion, Indian Ocean), *Bull. Volcanol.* 74, 1945–1961.

1407 Lengliné, O, Z. Duputel, and V. Ferrazzini (2016), Uncovering the hidden signature of a  
1408 magmatic recharge at Piton de la Fournaise volcano using small earthquakes, *Geophys. Res.*  
1409 *Lett.*, 43, doi: 10.1002/2016GL068383

1410 [Lindoo, A., J.F. Larsen, K.V. Cashman, A.L. Dunn, and O.K Neill \(2016\), An experimental](#)  
1411 [study of permeability development as a function of crystal-free melt viscosity, \*Earth Planet.\*](#)  
1412 [\*Sci. Lett.\*, 435, 45–54, doi: 10.1016/j.epsl.2015.11.035.](#)

1413 [Lindoo, A., J.F. Larsen, K.V. Cashman, and J. Oppenheimer \(2017\), Crystal controls on](#)  
1414 [permeability development and degassing in basaltic andesite magma, \*Geology\*, 45\(9\), p. 831-](#)  
1415 [834.](#)

1416 [Liuzzo, M., Di Muro, A., Giudice, G., Michon, L., Ferrazzini, V., and Gurrieri, S. \(2015\), New](#)  
1417 [evidence of CO2 degassing anomalies on the Piton de la Fournaise volcano and the link with](#)  
1418 [volcano tectonic structures \*Geochemistry, Geophysics, Geosystems\*, 16, doi:10.1002/](#)  
1419 [2015GC006032.](#)

1420 Mangan, M.T., and K.V. Cashman (1996), The structure of basaltic scoria and reticulite and  
1421 inferences for vesiculation, foam formation, and fragmentation in lava fountains. *J. Volcanol.*  
1422 *Geotherm. Res.*, 73, 1–18.

1423 Menand, T., and J.C. Phillips (2007), Gas segregation in dykes and sills. *J. Volcanol. Geother.*  
1424 *Res.*, 159(4), 393–408. <https://doi.org/10.1016/j.jvolgeores.2006.08.003>.

1425 Michon, L., A. Di Muro, N. Villeneuve, C. Saint-Marc, P. Fadda, and F. Manta (2013),  
1426 Explosive activity of the summit cone of Piton de la Fournaise volcano (La Réunion Island): a  
1427 historical and geological review, *J. Volcanol. Geotherm. Res.* 263, 117-133.

1428 [Moitra, P., H.M. Gonnermann, B.F. Houghton, and T. Giachetti \(2013\), Relating vesicle](#)  
1429 [shapes in pyroclasts to eruption styles, \*Bull. Volcanol.\* 75, 691. doi:10.1007/s00445-013-0691-](#)  
1430 [8](#)

1431 [Morgan D.J., and D.A. Jerram \(2006\), On estimating crystal shape for crystal size distribution](#)  
1432 [analysis, \*J. Volc. Geotherm. Res.\*, 154, 1–7.](#)

1433 Moune, S., O. Sigmarsson, P. Schiano, T. Thordarson, and J.K. Keiding (2012), Melt  
1434 inclusion constraints on the magma source of Eyjafjallajökull 2010 flank eruption, *J.*  
1435 *Geophys. Res.*, 117, B00C07, doi:10.1029/2011jb008718.

1436 Morandi, A., C. Principe, A. Di Muro, G. Leroi, L. Michon, and P. Bachèlery (2016), Pre-  
1437 historic explosive activity at Piton de la Fournaise volcano. In: Bachèlery P, Lénat JF, Di  
1438 Muro A, Michon L (eds) Active Volcanoes of the Southwest Indian Ocean: Piton de la  
1439 Fournaise and Karthala. Active Volcanoes of the World. Springer-Verlag, Berlin and  
1440 Heidelberg, pp 107–138

1441 Óladóttir, B., O. Sigmarsson, G. Larsen, and J.-L. Devidal (2011), Provenance of basaltic  
1442 tephra from Vatnajökull subglacial volcanoes, Iceland, as determined by major- and trace-  
1443 element analyses, *Holocene*, 21, 1037–1048, doi:10.1177/0959683611400456.

1444 [Oppenheimer, J., A.C. Rust, K.V. Cashman, and B. Sandnes \(2015\), Gas migration regimes](#)  
1445 [and outgassing in particle-rich suspensions, \*Frontiers in Physics\*, 3, 1–13, doi: 10.3389/fphy](#)  
1446 [.2015.00060.](#)

1447 Ort, M.H., A. Di Muro, L. Michon, and P. Bachèlery (2016), Explosive eruptions from the  
1448 interaction of magmatic and hydrothermal systems during flank extension: the Bellecombe  
1449 Tephra of Piton de La Fournaise (La Réunion Island), *Bull. Volcanol.* 78, 5,  
1450 doi:10.1007/s00445-015-0998-8.

1451 Papale P., R. Moretti, and D. Barbato (2006), The compositional dependence of the saturation  
1452 surface of H<sub>2</sub>O + CO<sub>2</sub> fluids in silicate melts, *Chemical Geology*, 229, 1/3, 78-95,  
1453 doi:10.1016/j.chemgeo.2006.01.013.

1454 Parcheta, C.E., B.F. Houghton, and D.A. Swanson (2013), Contrasting patterns of vesiculation  
1455 in low, intermediate, and high Hawaiian fountains: a case study of the 1969 Mauna Ulu  
1456 eruption, *J. Volcanol. Geotherm. Res.*, 255, 79–89

1457 [Peltier, A., P. Bachèlery, and T. Staudacher \(2009\), Magma transport and storage at Piton de la](#)  
1458 [Fournaise \(La Réunion\) between 1972 and 2007: A review of geophysical and geochemical](#)  
1459 [data. \*J. Volcanol. Geother. Res.\*, 184, 93-108.](#)

1460 Peltier, A., F. Beauducel, N. Villeneuve, V. Ferrazzini, A. Di Muro, A. Aiuppa, A. Derrien, K.  
1461 Jourde, and B. Taisne (2016), Deep fluid transfer evidenced by surface deformation during the  
1462 2014–2015 unrest at Piton de la Fournaise volcano, *J. Volcanol. Geotherm. Res.*, 321, 140–  
1463 148. <http://dx.doi.org/10.1016/j.jvolgeores.2016.04.031>.

1464 ~~[Peltier, A., P. Bachèlery, and T. Staudacher \(2009\), Magma transport and storage at Piton de la](#)~~  
1465 ~~[Fournaise \(La Réunion\) between 1972 and 2007: A review of geophysical and geochemical](#)~~  
1466 ~~[data. \*J. Volcanol. Geother. Res.\*, 184, 93–108.](#)~~

1467 Polacci, M., R. Corsaro, and D. Andronico (2006a), Coupled textural and compositional  
1468 characterization of basaltic scoria: insights into the transition from Strombolian to fire  
1469 fountain activity at Mount Etna, Italy, *Geology*, 34(3), 201–204. doi:10.1130/G223181.1.

1470 Polacci, M., C. Bouvet de Maisonneuve, D. Giordano, M. Piochi, L. Mancini L., W.  
1471 Degruyter, and O. Bachmann (2014), Permeability measurements of Campi Flegrei  
1472 pyroclastic products: an example from the Campanian Ignimbrite and Monte Nuovo  
1473 eruptions. *J. Volcanol. Geotherm. Res.* 272, 16–22.

1474 Putirka, K.D. (2008), Thermometers and barometers for volcanic systems, *Rev. Mineral.*  
1475 *Geochem.* 69, 61-120.

1476 Roeder, P., E. Gofton, and C. Thornber (2006), Cotectic proportions of olivine and spinel in  
1477 olivine-tholeiitic basalt and evaluation of pre-eruptive processes, *J. Petrol.*, 47, 883-900.

1478 Roult, G., A. Peltier, T. Staudacher, V. Ferrazzini, B. Taisne, A. Di Muro, and The OVPF Team  
1479 (2012), A comprehensive classification of the Piton de la Fournaise eruptions (La Réunion  
1480 Island) spanning the 1986–2010 period. Search for eruption precursors from the broad-band  
1481 GEOSCOPE RER station analysis and interpretation in terms of volcanic processes, *J.*  
1482 *Volcanol. Geotherm. Res.*, 241, 78–104.

1483 Rust, A.C., and K.V. Cashman (2011), Permeability controls on expansion and size  
1484 distributions of pyroclasts, *J. Geophys. Res.*, 116, B11202.

1485 [Saar, M.O., M. Manga, K.V. Cashman, and S. Fremouw \(2001\) Numerical models of the](#)  
1486 [onset of yield strength in crystal-melt suspensions: \*Earth Planet. Sci. Lett.\*, 187, 367–379, doi:](#)  
1487 [10.1016/S0012-821X\(01\)00289-8.](#)

1488 Salaün, A., Villemant, B., Semet, M.P., and T. Staudacher (2010), Cannibalism of olivine-rich  
1489 cumulate xenoliths during the 1998 eruption of Piton de la Fournaise (La Réunion hotspot):  
1490 Implications for the generation of magma diversity. *J. Volcanol. Geother. Res.*, 198, 187-204.

1491 Schiano, P., K. David, I. Vlastélic, A. Gannoun, M. Klein, F. Nauret, and Bonnard P. (2012),  
1492 Osmium isotope systematics of historical lavas from Piton de la Fournaise (Réunion Island,  
1493 Indian Ocean), *Contrib. Mineral. Petrol.*, <http://dx.doi.org/10.1007/s00410-012-0774-0>.

1494 [Shea, T., \(2017\) Bubble nucleation in magmas: a dominantly heterogeneous process? \*J.\*](#)  
1495 [\*Volcanol. Geotherm. Res.\* 343, 155–170.](#)

1496 Shea, T., B.F. Houghton, L. Gurioli, K.V. Cashman, J.E. Hammer, and B. Hobden (2010),  
1497 Textural studies of vesicles in volcanic rocks: an integrated methodology, *J. Volcanol.*  
1498 *Geotherm. Res.*, 190, 271–289.

1499 Shea, T., L. Gurioli, and B.F. Houghton (2012), Transitions between fall phases and  
1500 pyroclastic density currents during the AD 79 eruption at Vesuvius: building a transient  
1501 conduit model from the textural and volatile record, *Bull. Volcanol.*, 74, 2363–2381,  
1502 doi:10.1007/s00445-012-0668-z.

1503 [Shea, T., \(2017\) Bubble nucleation in magmas: a dominantly heterogeneous process? \*J.\*](#)  
1504 [\*Volcanol. Geotherm. Res.\* 343, 155–170.](#)

1505 Sparks, R.S.J. (1978), The dynamics of bubble formation and growth in magmas: a review  
1506 and analysis, *J. Volcanol. Geotherm. Res.*, 3, 1–37.

1507 Sparks, R.S.J. (2003). Forecasting volcanic eruptions, *Earth Planet. Sci. Lett.*, 210, 1–15.

1508 [Spina, L., C. Cimarelli, B. Scheu, D. Di Genova, and D. B. Dingwell \(2016\) On the slow](#)  
1509 [decompressive response of volatile- and crystal-bearing magmas: An analogue experimental](#)  
1510 [investigation, \*Earth Planet. Sci. Lett.\*, 433, 44-53.](#)

1511 Staudacher, T., and A. Peltier (2015), Ground deformation at Piton de la Fournaise (La  
1512 Réunion Island), a review from 20 years of GNSS monitoring, In: Bachèlery P, Lénat, JF, Di  
1513 Muro A, Michon L (ed) Active volcanoes of the Southwest Indian Ocean: Piton de la

1514 Fournaise and Karthala. Active volcanoes of the world. Springer, Berlin, 139-170.  
1515 doi:10.1007/978-3-642-31395-0\_9

1516 Staudacher, T., V. Ferrazzini, A. Peltier, P. Kowalski, P. Boissier, P. Catherine, F. Lauret, and  
1517 F. Massin (2009), The April 2007 eruption and the Dolomieu crater collapse, two major  
1518 events at Piton de la Fournaise (La Reunion Island, Indian Ocean). *J. Volcanol. Geother. Res.*  
1519 *184*, 126-137, doi:10.1016/j.jvolgeores.2008.11.005.

1520 Stovall, W.K., B.F. Houghton, H.M. Gonnermann, S.A. Fagents, and D.A. Swanson (2011),  
1521 Eruption dynamics of Hawaiian-style fountains: the case study of episode 1 of the Kīlauea Iki  
1522 1959 eruption, *Bull. Volcanol.* *73*, 511–529. doi:10.1007/s00445-010-0426-z.

1523 Stovall, W.K., B.F. Houghton, J.E. Hammer, S.A. Fagents, and D.A. Swanson (2012),  
1524 Vesiculation of high fountaining Hawaiian eruptions: episodes 15 and 16 of 1959 Kīlauea Iki,  
1525 *Bull. Volcanol.*, *74*, 441–455, doi:10.1007/s00445-011-0531-7.

1526 Swanson, D.A., K. Wooten, and T. Orr (2009), Buckets of ash track tephra flux from  
1527 Halema‘ūma‘ū crater, Hawai‘i. *Eos Trans. AGU*, *90*, 427–428. doi:10.1029/2009EO460003.

1528 Taddeucci, J., M. Pompilio, and P. Scarlato (2002), Monitoring the explosive activity of the  
1529 July–August 2001 eruption of Mt. Etna (Italy) by ash characterization, *Geophys. Res. Lett.*,  
1530 *29*(8), 1029–1032. doi:10.1029/2001GL014372.

1531 Tait, S., C. Jaupart, and S. Vergnolle (1989), Pressure, gas content and eruption periodicity of  
1532 a shallow, crystallising magma chamber, *Earth Planet. Sci. Lett.*, *92*, 107-123.

1533 [Takeuchi, S., S. Nakashima, and A. Akihiko Tomiya \(2008\) Permeability measurements of](#)  
1534 [natural and experimental volcanic materials with a simple permeameter: toward an](#)  
1535 [understanding of magmatic degassing processes, \*J. Volcanol. Geotherm. Res.\*, \*177\*:329–339.](#)

1536 Thornber, C.R., K. Hon, C. Heliker, and D.A. Sherrod (2003), A Compilation of Whole-Rock  
1537 and Glass Major-Element geochemistry of Kīlauea Volcano, Hawai‘i, near-vent eruptive  
1538 products: January 1983 through September 2001: *U.S.G.S. Open File Report*, 03-477.

1539 Thordarson, T, S Self, N Óskarsson, and T Hulsebosch (1996), Sulfur, chlorine and fluorine  
1540 degassing and atmospheric loading by the 1783–1784 AD Laki (Skaftár Fires) eruption in  
1541 Iceland, *Bull. Volcanol.* *58*, 205–225.



1542 Villemant, B., A. Salaün, and T. Staudacher (2009), Evidence for a homogeneous primary  
1543 magma at Piton de la Fournaise (La Réunion): A geochemical study of matrix glass, melt  
1544 inclusions and Pélé's hairs of the 1998–2008 eruptive activity, *J. Volcanol. Geotherm. Res.*,  
1545 *184*, 79–92.

1546 Vlastélic, I., and A.J. Pietruszka (2016), A review of the recent geochemical evolution of  
1547 Piton de la Fournaise Volcano (1927–2010). In: Bachèlery, P., Lénat, J.F., Di Muro, A.,  
1548 Michon, L. (Eds.), Active Volcanoes of the Southwest Indian Ocean. In: Active Volcanoes of  
1549 the World, pp.185–201.

1550 ~~Vlastélic, I., T. Staudacher, and M. Semet (2005), Rapid change of lava composition from~~  
1551 ~~1998 to 2002 at Piton de la Fournaise (Réunion) inferred from Pb isotopes and trace elements:~~  
1552 ~~evidence for variable crustal contamination, *J. Petrol.* *46*, 79–107.~~

1553 Vlastélic, I., A. Peltier, and T. Staudacher (2007), Short-term (1998–2006) fluctuations of Pb  
1554 isotopes at Piton de la Fournaise volcano (Réunion Island): origins and constraints on the size  
1555 and shape of the magma reservoir, *Chem. Geology*, *244*, 202–220.

1556 Vlastélic, I., C. Deniel, C. Bosq, P. Telouk, P. Boivin, P. Bachèlery, V. Famin., and T.  
1557 Staudacher (2009), Pb isotope geochemistry of Piton de la Fournaise historical lavas, *J.*  
1558 *Volcanol. Geother. Res.*, *184*, 63–78.

1559 ~~Vlastélic, I., T. Staudacher, P. Bachèlery, P. Télouk, D. Neuville., and M. Benbakkar (2011)~~  
1560 ~~Lithium isotope fractionation during magma degassing: constraints from silicic differentiates~~  
1561 ~~and natural gas condensates from Piton de la Fournaise volcano (Réunion Island), *Chemical*~~  
1562 ~~*Geology*, *284*, 26–34.~~

1563 Vlastélic, I., G. Menard, M. Gannoun, J.-L. Piro., T. Staudacher, and V. Famin (2013), Magma  
1564 degassing during the April 2007 collapse of Piton de la Fournaise: the record of semi-volatile  
1565 trace elements (Li, B, Cu, In, Sn, Cd, Re, Tl, Bi), *J. Volcanol. Geother. Res.*, *254*, 94–107.

1566 Vlastélic, I., A. Gannoun, A. Di Muro, L. Gurioli, P. Bachèlery, and J.M. Henot (2016), Origin  
1567 and fate of sulfide liquids in hotspot volcanism (La Réunion): Pb isotope constraints from  
1568 residual Fe–Cu oxides, *Geochim. Cosmochim. Acta*, *194*, 179–192.

1569 Welsch, B., F. Faure, P. Bachèlery, and V. Famin (2009), Microcrysts record transient  
1570 convection at Piton de la Fournaise volcano (La Réunion Hotspot), *J. Petrol.*, *50*, 2287–2305.

1571 Welsch, B., V. Famin, A. Baronnet, and P. Bachèlery (2013), Dendritic crystallization: a single  
1572 process for all textures of olivine in basalts? *J. Petrol.*, *54*, 539-574.

1573 White, J.D.L., and B.F. Houghton (2006), Primary volcanoclastic rocks, *Geology*, *34*, 677–  
1574 680, doi:10.1130/G22346.1.

1575 **Figure captions**

1576 |

1577

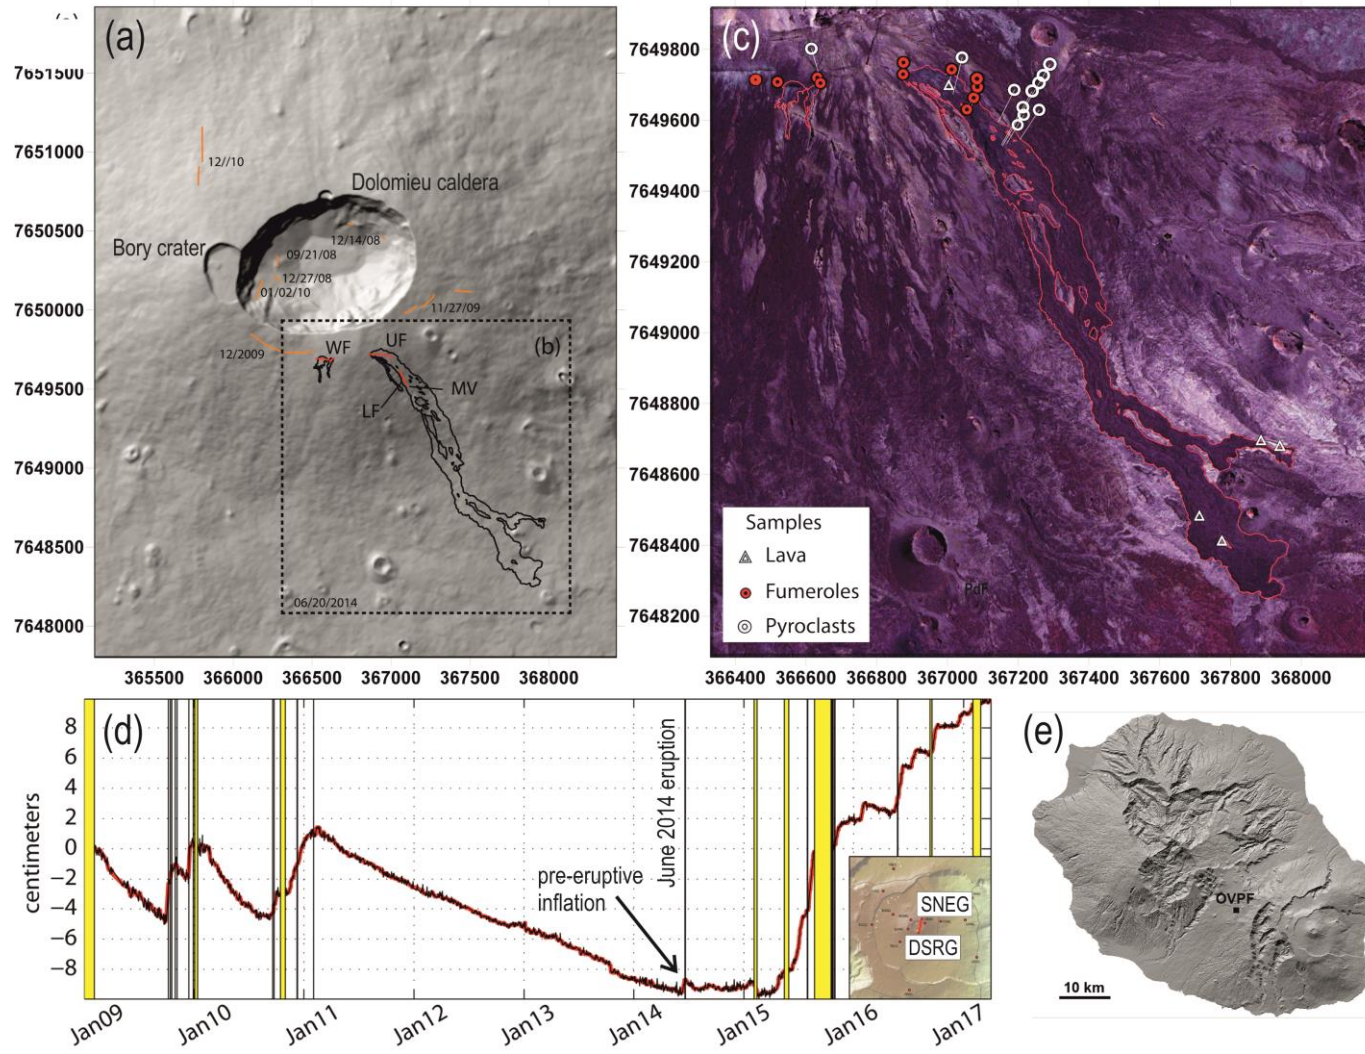

1578

1579

1580 **Figure 1** a) Digital elevation model of the summit crater area at Piton de la Fournaise, La Réunion, France; orange = fractures generated by pre-  
1581 2014 eruptions (reported are the dates of their activities); b) red = fractures active during the 2014 eruption: WF (western fracture), UF (upper  
1582 fracture), LF (lower fracture), MV (Main Vent). Black= outline of the 2014 lava field; c) locations of sample collection points. The coordinates  
1583 are in UTM, zone 40 south. (d) Distance change (baseline) in centimetres between two GNSS summit stations: DSRG and SNEG (see location in  
1584 the inset). Increase and decrease of the signal mean a summit inflation and deflation, respectively. The yellow areas represent eruptive and  
1585 intrusive periods. In this figure, the rapid and strong variations linked to dike injections preceding intrusions and eruptions by a few tens of  
1586 minutes have been removed; (e) Digital Elevation Model of La Réunion island.

1587

1588

# June 2014 eruption at PdF

Early morning, June 21

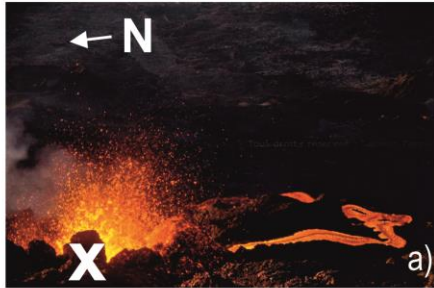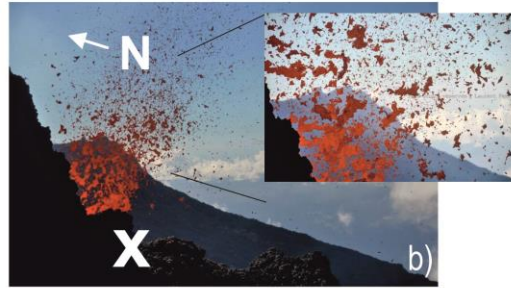

June 21 ~ 7h00

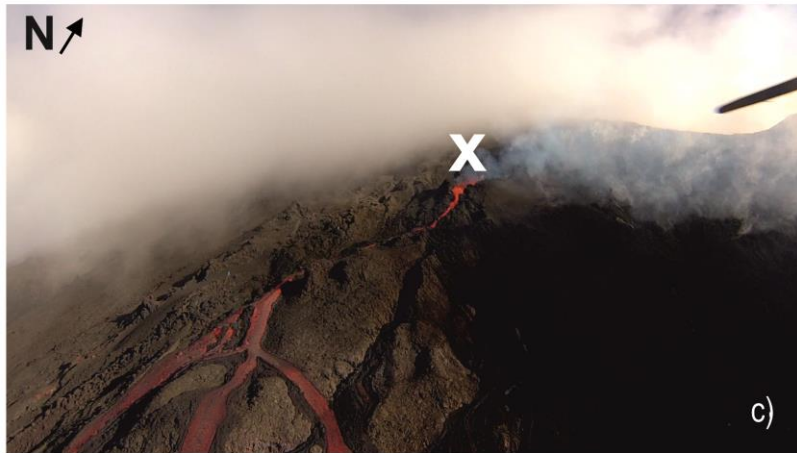

June 21, 7h38

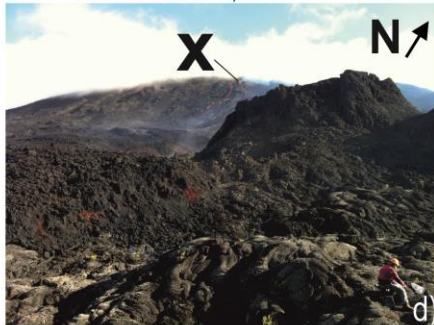

June 21, 13h35

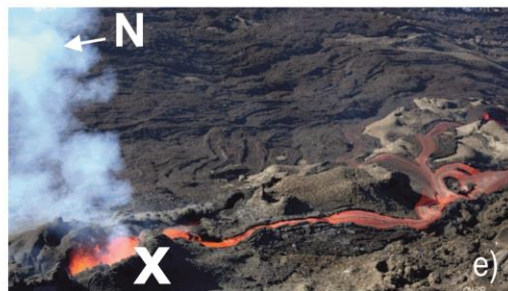

June 21, 17h00

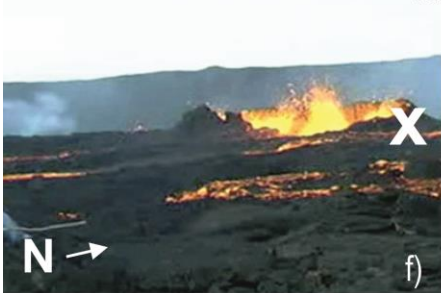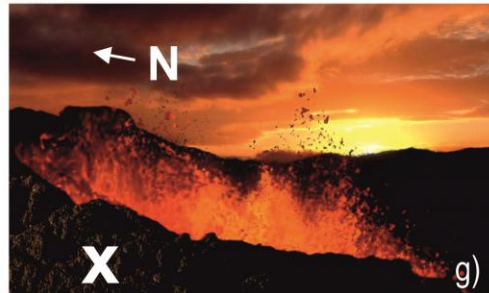



## June 2014 eruption at PdF

Early morning, June 21

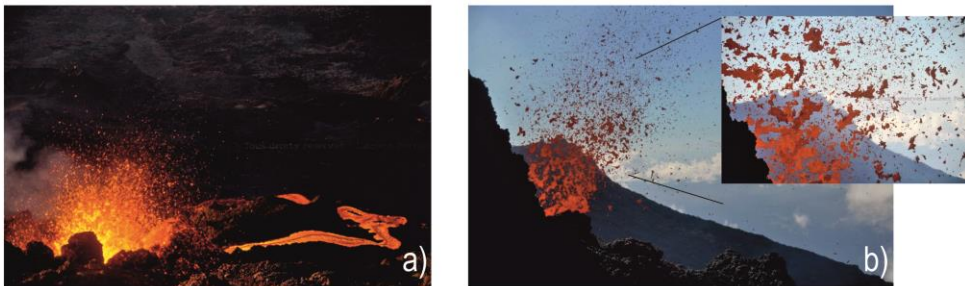

June 21, 13h35

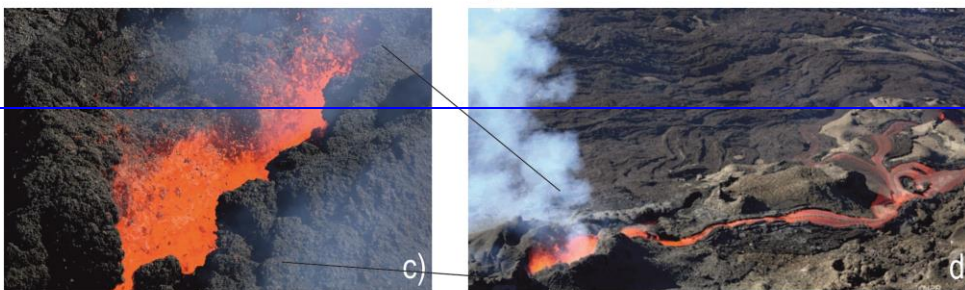

June 21, 17h00

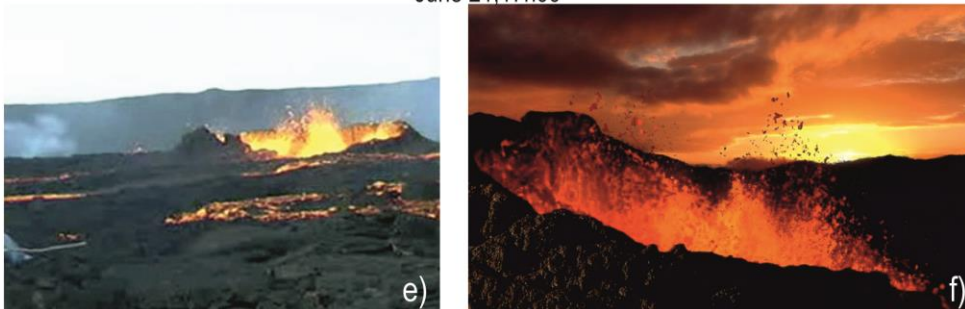

1590

1591

1592 **Figure 2** Photos collection from the [web site](#) 2014 eruption of the Main Vent, highlighted with  
1593 [a white cross](#) (see location in Fig. 1). From a to [gf](#): evolution of [the Strombolian](#)  
1594 [activity from early morning to evening, June 21 that shows —a decline in the activity with time.](#)  
1595 [Unfortunately, the more energetic fountaining events that happened during the night were not](#)  
1596 [documented. a\) Strombolian activity at the Main Vent and associated lava flow; b\) zoom view](#)  
1597 [of the Strombolian activity at the Main Vent. All the photos are from the Main Vent \(see Fig.](#)  
1598 [4\).](#)—The images in a, b and the inset in b are from Laurent Perrier; c) [aerial view of the SE](#)  
1599 [flank of the PdF, taken by the OVPF team from the helicopter of the gendarmerie of PdF; d\)](#)

1600 [eastern front of the lava where the OVPF team collected a quenched lava sample; e\) low](#)  
1601 [Strombolian activity at the Main Vent and the associated lava flow, photo from:](#)  
1602 <http://www.rtl.fr/actu/sciences-environnement/la-reunion-eruption-du-piton-de-la-fournaise->  
1603 [apres 4 ans de sommeil 7772778861;](http://www.rtl.fr/actu/sciences-environnement/la-reunion-eruption-du-piton-de-la-fournaise-) d)  
1604 <http://www.ipreunion.com/volcan/reportage/2014/06/21/eruption-du-piton-de-la-fournaise->  
1605 [actualise-a-17h-la-lave-coule-sur-1-5-kilometre,26023.html;](http://www.ipreunion.com/volcan/reportage/2014/06/21/eruption-du-piton-de-la-fournaise-) f) and g) decline of the  
1606 [Strombolian activity at the Main Vent, the photo in e\) is from](#) <http://www.zinfos974.com/L->  
1607 [eruption-du-Piton-de-la-Fournaise-Le-point-de-](#)  
1608 [17h\\_a72981.html](#)<http://www.zinfos974.com/L-eruption-du-Piton-de-la-Fournaise-Le-point-de->  
1609 [17h\\_a72981.html;](#) and the photo if f) is from: f) <http://nancyroc.com/eruption-a-la-reunion>

1610

1611

1612

1613

1614

1615

1616

1617

1618

1619

1620

1621

## Main Vent

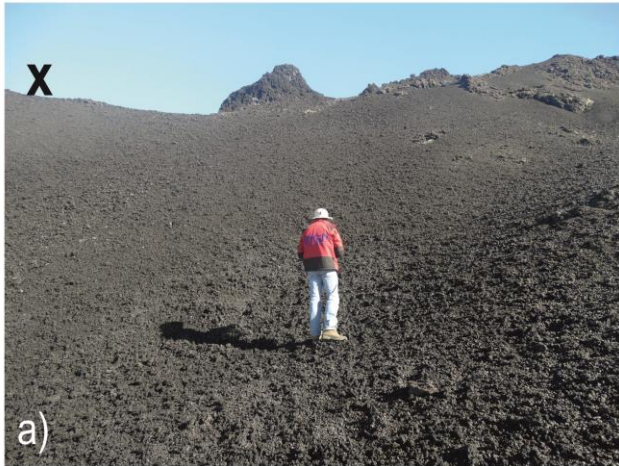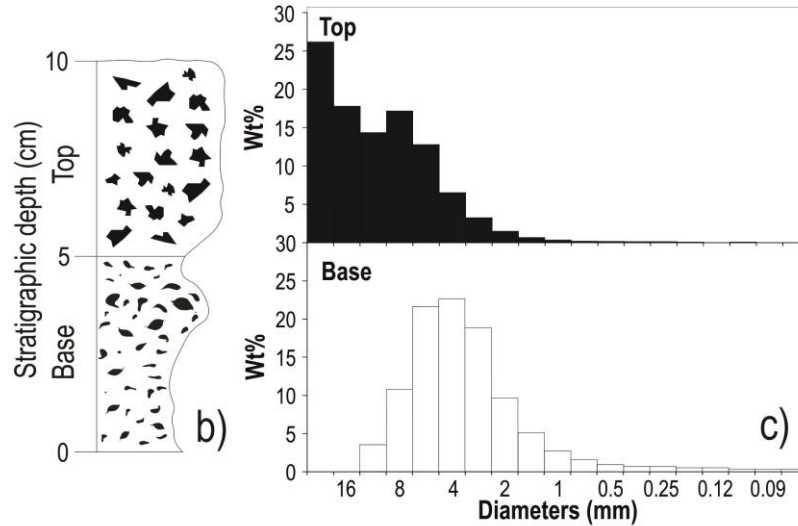

## Western fracture

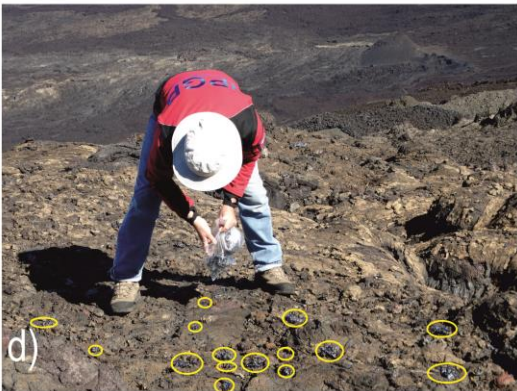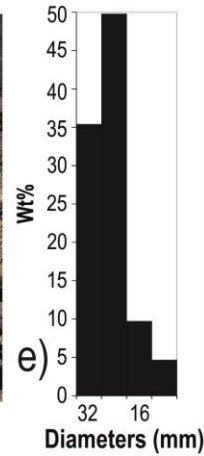

## 2010 Fountaining    2014 Explosions

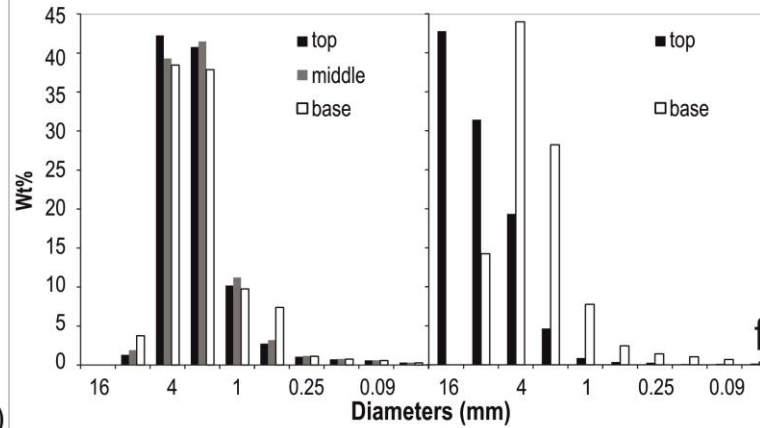



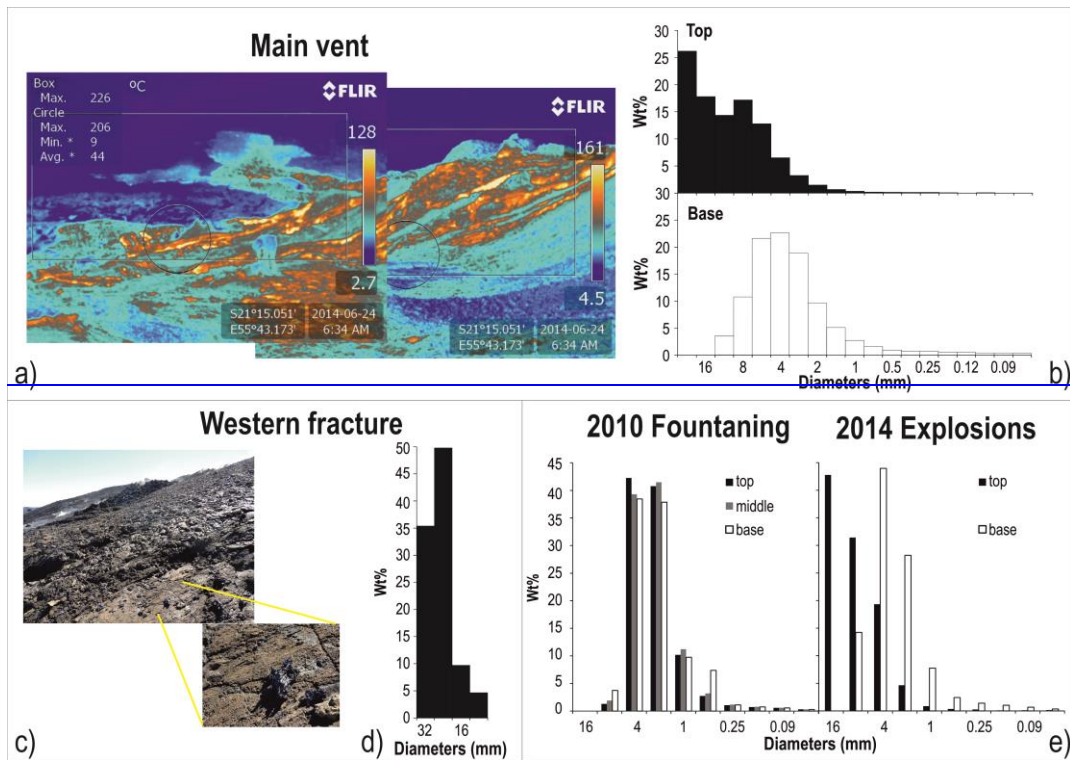

1623

1624 **Figure 3** a) Continuous blanket of scoria fall out deposit emitted from the Main Vent during June 2014 eruption at PdF. The black cross locates  
 1625 the position of the Main Vent (see Fig. 1 for the location); b) schematic stratigraphical log of the scoria fall out deposit emplaced during June  
 1626 2014 eruption. Thermal photo of the scoria fall out area in proximity to the Main Vent (see Fig. 1 for the location); bc) grain size histograms for  
 1627 the base and the top of the deposit of the Main Vent, the particle diameters are at half phi; de) scattered scoria (outlined in yellow) from the  
 1628 Western Fracture (see Fig. 1 for the location); ed) grain size histogram of the scoria deposit at the Western Fracture, the particle diameters are in

1629 | [full phi; fe](#)) comparison between the grain size histograms for the 2010 Hawaiian fountaining and the 2014 Main vent activity. [both the particle](#)  
1630 | [axes are reported in full phi for comparison.](#)

1631

1632

1633

1634

1635

1636

1637

1638

1639

1640

| Type                       | Clast                                                                                      | Thin section                                                                        | Microscope                                                                                     | SEM (25X)                                                                                    | VSD                                                                                            | Crystal vol %                                                                     | $N_v$                                                 |
|----------------------------|--------------------------------------------------------------------------------------------|-------------------------------------------------------------------------------------|------------------------------------------------------------------------------------------------|----------------------------------------------------------------------------------------------|------------------------------------------------------------------------------------------------|-----------------------------------------------------------------------------------|-------------------------------------------------------|
| Golden Pumice<br>(a)       |           |    | <br>0.02 mm   |            | <br>n = 2   | Tot = 8-15<br>Mplg = rare<br>$\mu$ plg = 6-11<br>McpX = rare<br>$\mu$ cpx = (1-3) | $2 \times 10^7$<br>$9 \times 10^6$                    |
| Fluidal Scoria<br>(b)      |           |    | <br>0.02 mm   |            | <br>n = 3   | Tot = 4-23<br>Mplg = 0.4-1<br>$\mu$ plg = 2-19<br>McpX = 0-1<br>$\mu$ cpx = 1-4   | $2 \times 10^7$<br>$5 \times 10^6$<br>$3 \times 10^6$ |
| Spiny glassy scoria<br>(c) |           |    | <br>0.02 mm   |            | <br>n = 1   | Tot = 51<br>Mplg = 11<br>$\mu$ plg = 23<br>McpX = 15<br>$\mu$ cpx = 2             | $6 \times 10^6$                                       |
| Spiny opaque scoria<br>(d) | <br>1 cm |   | <br>0.02 mm  |           | <br>n = 1  | Tot = 55<br>Mplg = 11<br>$\mu$ plg = 25<br>McpX = 10<br>$\mu$ cpx = 9             | $4 \times 10^6$                                       |
| Lava<br>(e)                | <br>1 m |  | <br>0.02 mm | <br>1 mm | <br>n = 1 | Tot = 100<br>Mplg = 2<br>$\mu$ plg = 64<br>McpX = 3<br>$\mu$ cpx = 31             | $2 \times 10^4$                                       |

1642 **Figure 4** Textural features of June 2014 pyroclasts and lava. Clast = photo of the different types of juvenile pyroclasts and lava channel. The  
1643 photo of the lava channel is from Laurent Perrier. WF = Western Fracture (smooth fluidal scoria), MV = Main Vent (fluidal scoria, less smooth  
1644 than the ones at the WF). Thin section = thin section imaged with a desktop scanner. Microscope = photo taken with an optical microscope using  
1645 natural light; SEM (25X) = photo captured using a scanning electron microscopy (SEM), in BSE mode at 25x magnification: black are vesicles,  
1646 white is glass, grey are crystals. VSD = vesicle volume distribution histograms, where the diameter, in mm, is plotted versus the volume  
1647 percentage, n = number of measured clasts; Crystal vol. % : Tot = total percentage of crystals corrected for the vesicularity; Mplg = percentage  
1648 of mesocrysts of plagioclase;  $\mu$ plg = percentage of microcrysts of plagioclase; Mepx = percentage of mesocrysts of pyroxene;  $\mu$ cpx = percentage  
1649 of microcrysts of pyroxene; Nv = number density corrected for the vesicularity.

1650

1651

1652

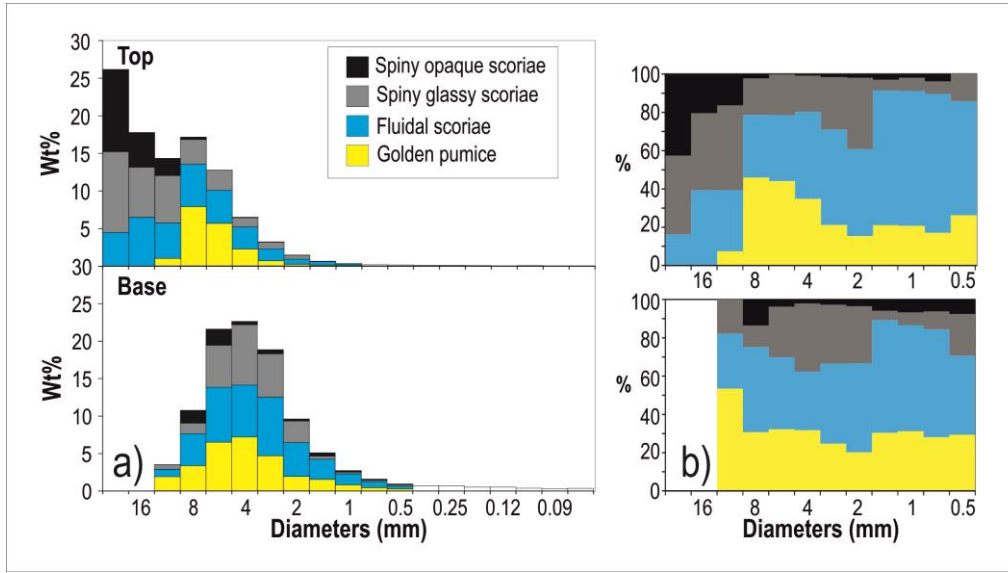

1653

| Type                    | Clast | Thin section | Microscope  | SEM (25X) | VSD (%; mm) | %cry                             | N <sub>v</sub>                                        |
|-------------------------|-------|--------------|-------------|-----------|-------------|----------------------------------|-------------------------------------------------------|
| Golden Pumice (a)       |       |              | <br>0.02 mm |           |             | Meso = (rare)<br>Micro = (14-15) | $2 \times 10^7$<br>$9 \times 10^6$                    |
| Fluidal Scoria (b)      |       |              | <br>0.02 mm |           |             | Meso = (0-5)<br>Micro = (14-29)  | $2 \times 10^7$<br>$5 \times 10^6$<br>$3 \times 10^6$ |
| Spiny glassy scoria (c) |       |              | <br>0.02 mm |           |             | Meso = (14)<br>Micro = (25)      | $6 \times 10^6$                                       |
| Spiny opaque scoria (d) |       |              | <br>0.02 mm | <br>1 mm  |             | Meso = (23)<br>Micro = (31)      | $4 \times 10^6$                                       |

1654

1655 **Figure 4** Textural features of the 2014 pyroclasts. Clast = photo of the different types of  
 1656 juvenile pyroclasts. Thin section = thin section imaged with a desktop scanner. Microscope =  
 1657 photo taken with an optical microscope using natural light; SEM (25X) = photo captured  
 1658 using a scanning electron microscopy (SEM), in BSE mode at 25x magnification; black are  
 1659 vesicles, white is glass, grey are crystals. VSD = vesicle volume distribution histograms,

1660 where the diameter, in mm, is plotted versus the volume percentage. %Cry = is the total  
 1661 percentage of crystals corrected for the vesicularity. N<sub>v</sub> = number density

1662

1663

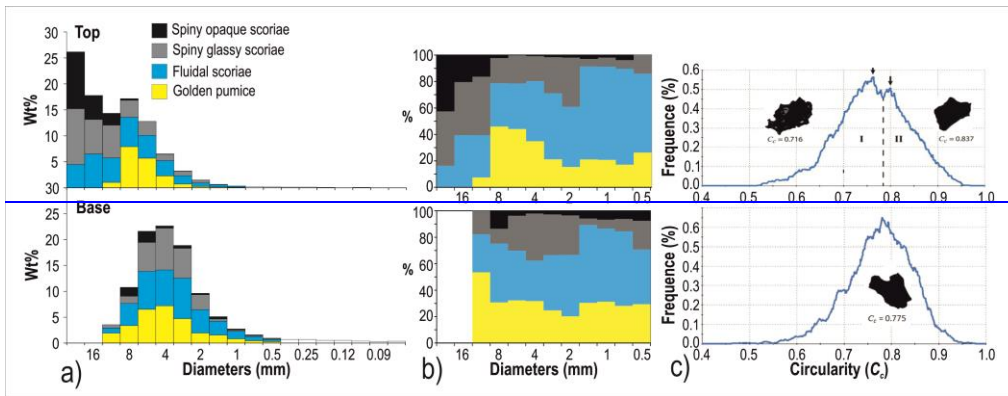

1664

1665 **Figure 5** Proportion of each type of clast measured ~~from the Main Cone~~ from the base to the  
 1666 top of the 10 cm thick deposit emplaced during the eruption, at the Main Vent site. The  
 1667 deposit is dominated by Hawaiian-like lapilli fragments at the base (golden pumice and fluidal  
 1668 scoria) and Strombolian-like bombs and lapilli at the top (spiny scoria) ~~for the 2014 eruption~~.  
 1669 (a) componentry within the different grain size classes ~~from the base to the top of a 10 cm~~  
 1670 ~~thick scoria deposit~~; b) normalized componentry composition from the base to the top of the  
 1671 deposits.

1672 ; (c) Morphologi G3 results for the coarse ash fragments (350 micron), where the population  
 1673 is formed exclusively of smooth fragments that correspond to fluidal and golden pumice.



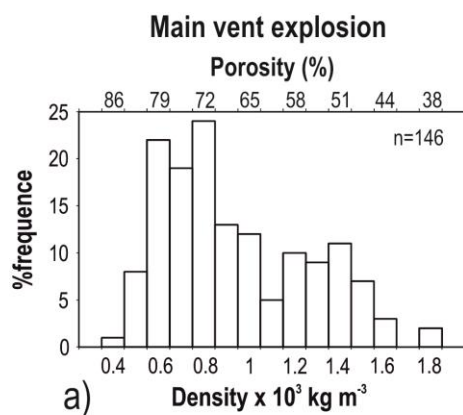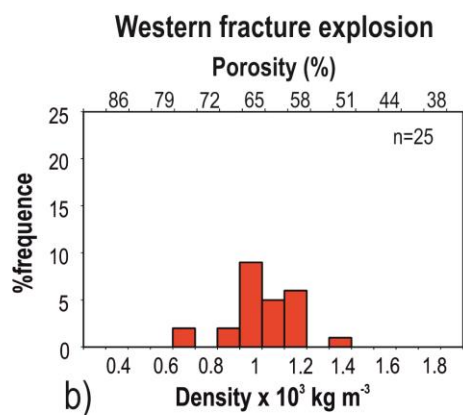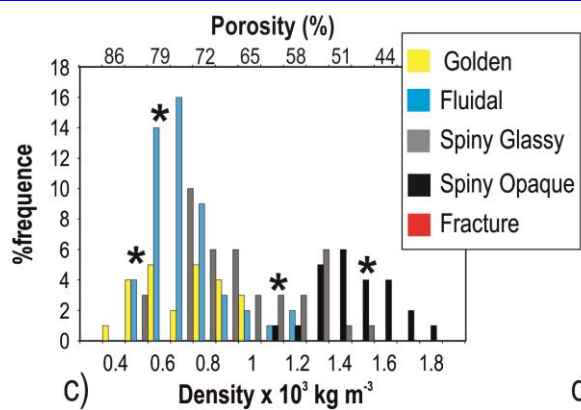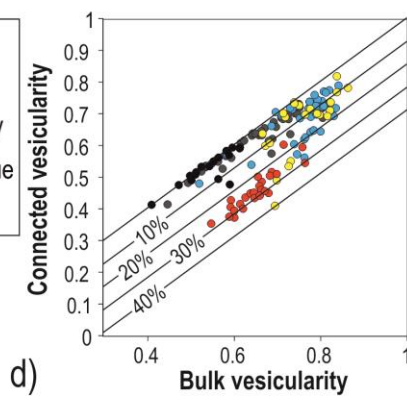

1674

1675

1676

1677

1678

1679

1680

1681

1682

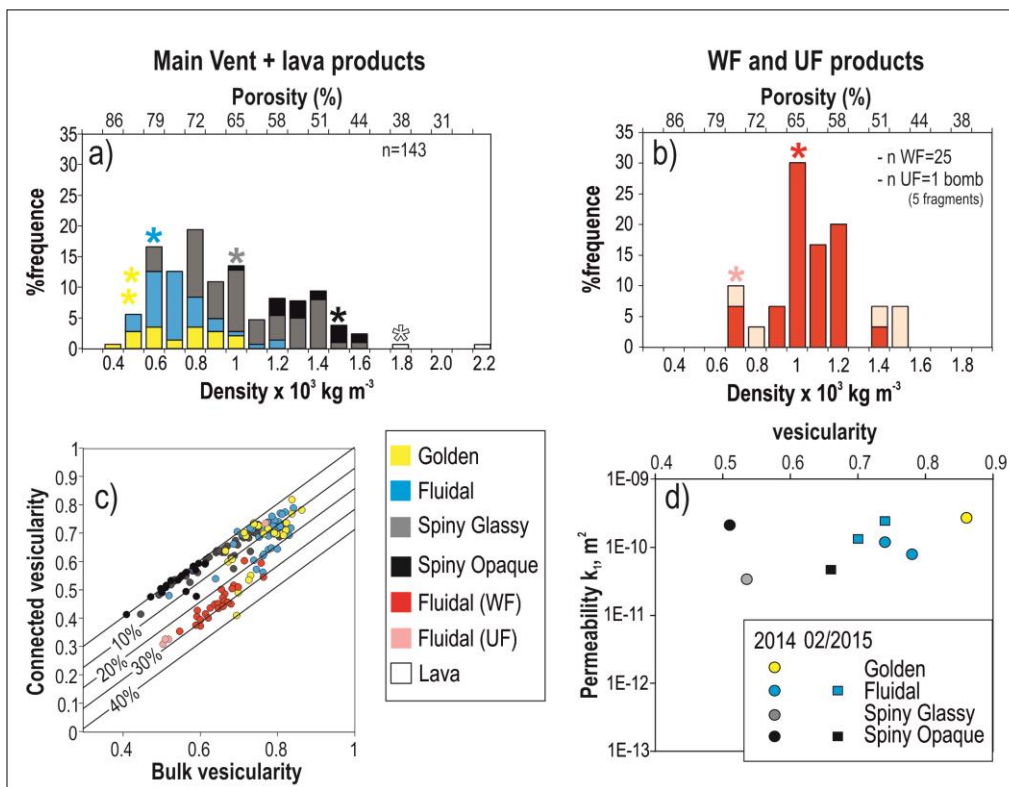

1683

1684 **Figure 6** Density, connectivity and permeability data of June 2014 pyroclast and lava  
 1685 fragments: a) density distribution histogram for all the pyroclast fragments measured at the  
 1686 Main vent + two lava fragments collected from the Eastern front of the lava flow (see Fig. 1  
 1687 for location). n = number of measured clasts; b) density distribution histogram for the  
 1688 pyroclasts sampled at the WF and the bomb sampled at the UF. The bomb broke in five  
 1689 fragments (2 fragments from the core, the least dense, and three fragments from the quenched  
 1690 edges, the densest); and c) In both the density the stars represent the density intervals from  
 1691 which we picked the clasts for the textural measurements; c) graph of connected vesicularity  
 1692 versus total vesicularity. The diagonal line represents equality between the connectivity and  
 1693 vesicularity, beneath this line the samples have isolated vesicles and the straight lines  
 1694 represent lines of equal fraction of isolated vesicles. To note that the bomb from the UF has  
 1695 the high vesicular core with less than 5% of isolated vesicles, while the three low vesicular  
 1696 fragments from the core have more than 25% of isolated vesicles; d) Darcian permeability  
 1697 (k<sub>1</sub>) versus the vesicularity fraction. Data from June 2014 eruption and February 2015  
 1698 eruption are reported.



1699 ~~Density and connectivity data of the 2014 pyroclast fragments: a) density distribution~~  
1700 ~~histogram for all the pyroclast fragments measured for the 2014 activity from the Main Vent;~~  
1701 ~~b) for the Western fracture; and c) for different typologies of clasts from the Main Vent; d)~~  
1702 ~~graph of connected vesicularity versus total vesicularity. The diagonal line represents equality~~  
1703 ~~between the connectivity and vesicularity, beneath this line the samples have isolated vesicles~~

1704

1705

1706

1707

1708

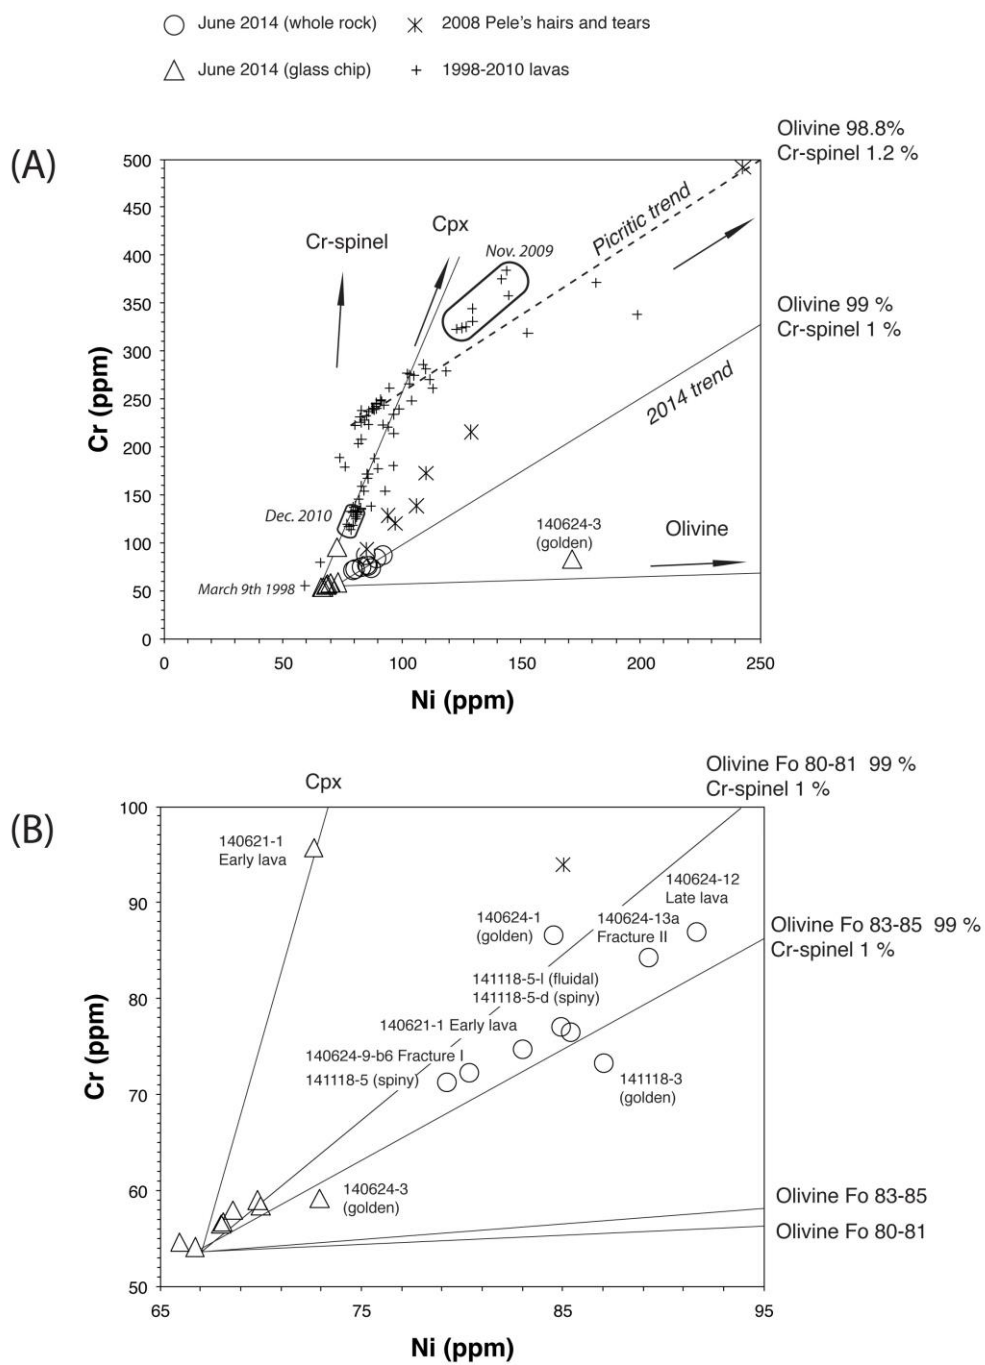

1709

1710 **Figure 7** Ni-Cr concentration plot. (a) Ni-Cr signature of the June 2014 lavas compared to  
 1711 that of recent eruptions (Di Muro et al. (2015) and unpublished data). Whole-rock (circles)

1712 and glass (triangles) compositions are shown for the June 2014 eruption. Olivine controlled  
1713 lines are indicated for olivine hosting 1.2 and 0.6 wt.% Cr-spinel. Compositions used for  
1714 olivine (Ni=1900 ppm, Cr=300ppm), clinopyroxene (Ni=970 ppm, Cr=4800 ppm), and Cr  
1715 spinel (Ni=1500 ppm, Cr=25%) are inferred from Salaün et al. (2010), Di Muro et al. (2015)  
1716 and Welsch et al. (2009). (b) Zoom of the Ni-Cr relationship between glass (triangles) and  
1717 whole-rock (circles) samples from the June 2014 eruption. Fracture I = Western fracture,  
1718 Fracture II = Upper fracture. Careful sample selection has permitted to obtain a set of virtually  
1719 olivine-cpx free crystals. Any addition of mafic crystals translates into enrichment in Ni-Cr;  
1720 those samples that contain a few % of crystals, (consistent with textural and petrological  
1721 observation) are slightly enriched in compatible elements.

1722

1723

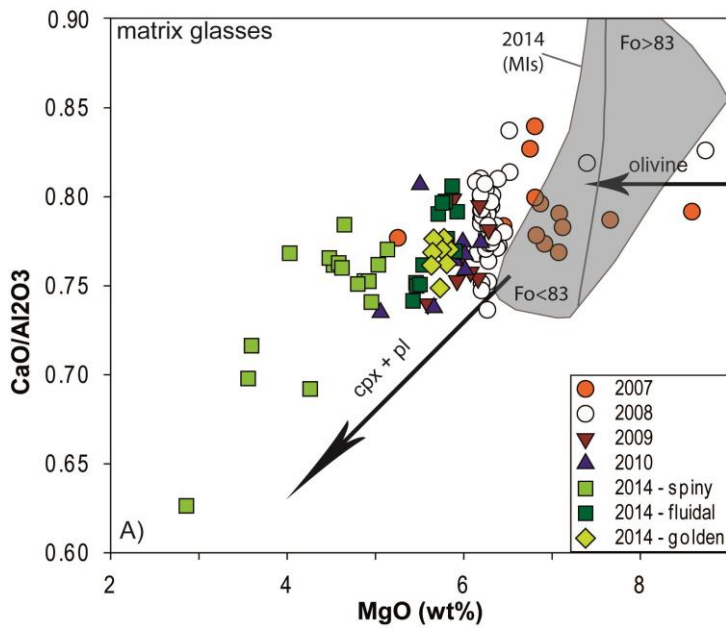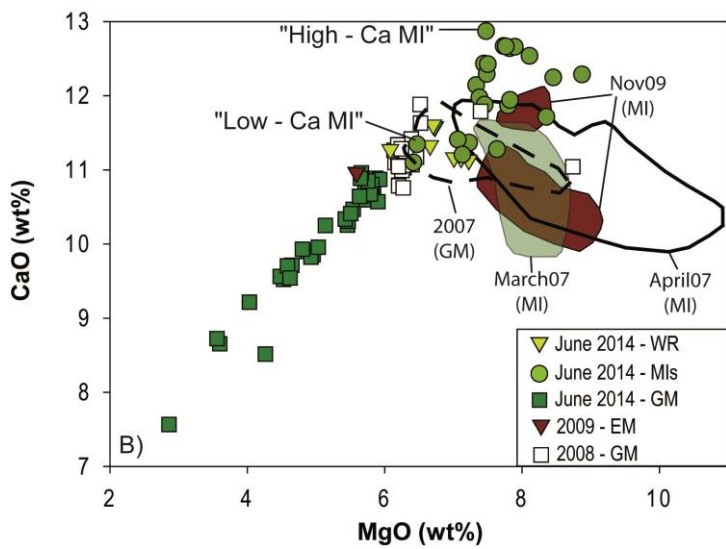

1724

1725 **Fig. 8** (a) Evolution of  $\text{CaO}/\text{Al}_2\text{O}_3$  ratio in the matrix glasses of recent eruptions at Piton de la  
 1726 Fournaise as a function of MgO content (directly proportional to melt temperature). MI =  
 1727 Melt inclusions (grey area for the 2014 samples). (b) CaO versus MgO content for Piton de la  
 1728 Fournaise products. WR = whole rock, GM = ground mass; MI = melt inclusion, EM =  
 1729 embayment glass

1730

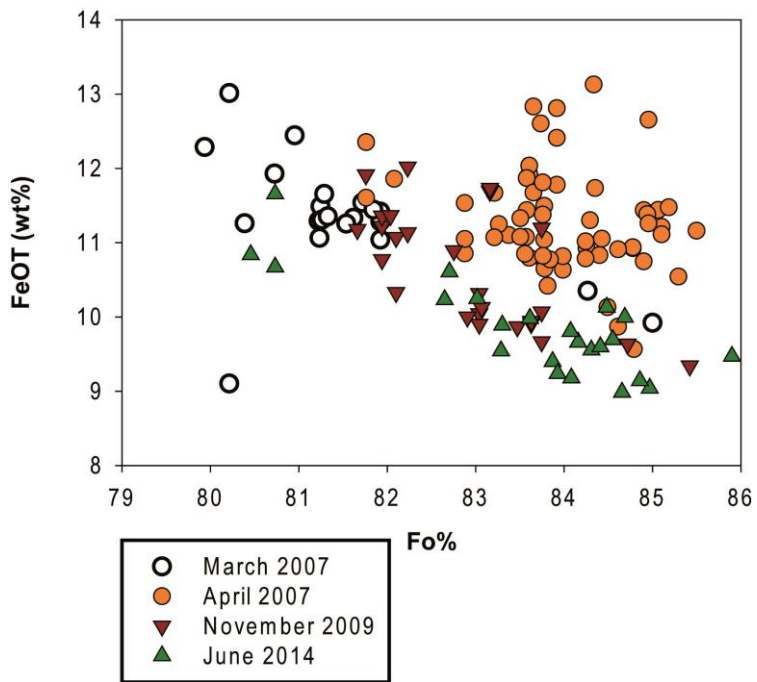

1731

1732 **Figure 9** FeO<sub>T</sub> in melt inclusions as function of Fo content of the olivine host for recent  
 1733 eruptions at Piton de la Fournaise

1734

1735

1736

1737

1738

1739

1740

1741

1742

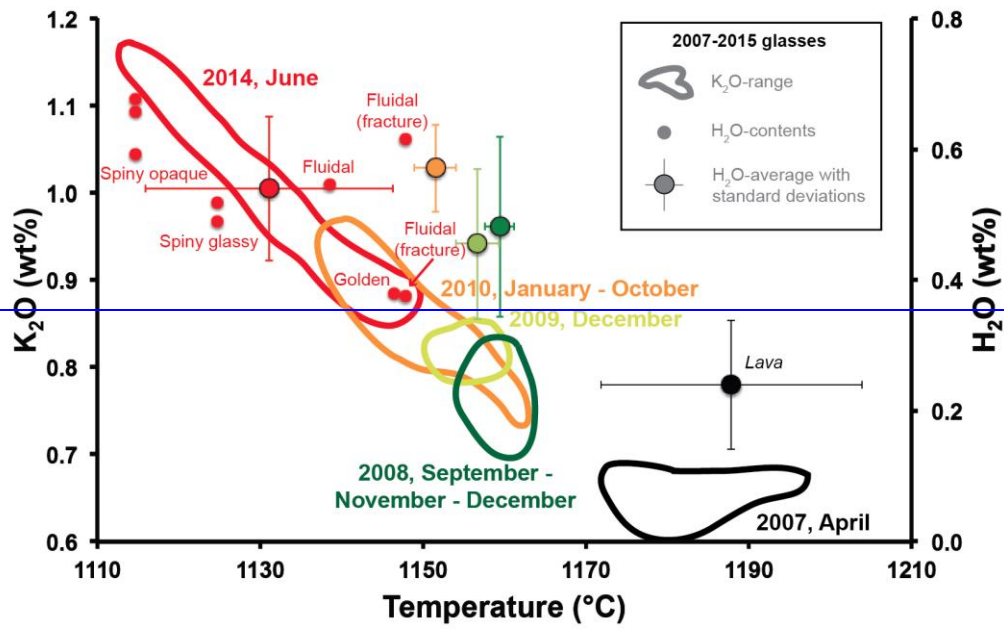

1743

1744

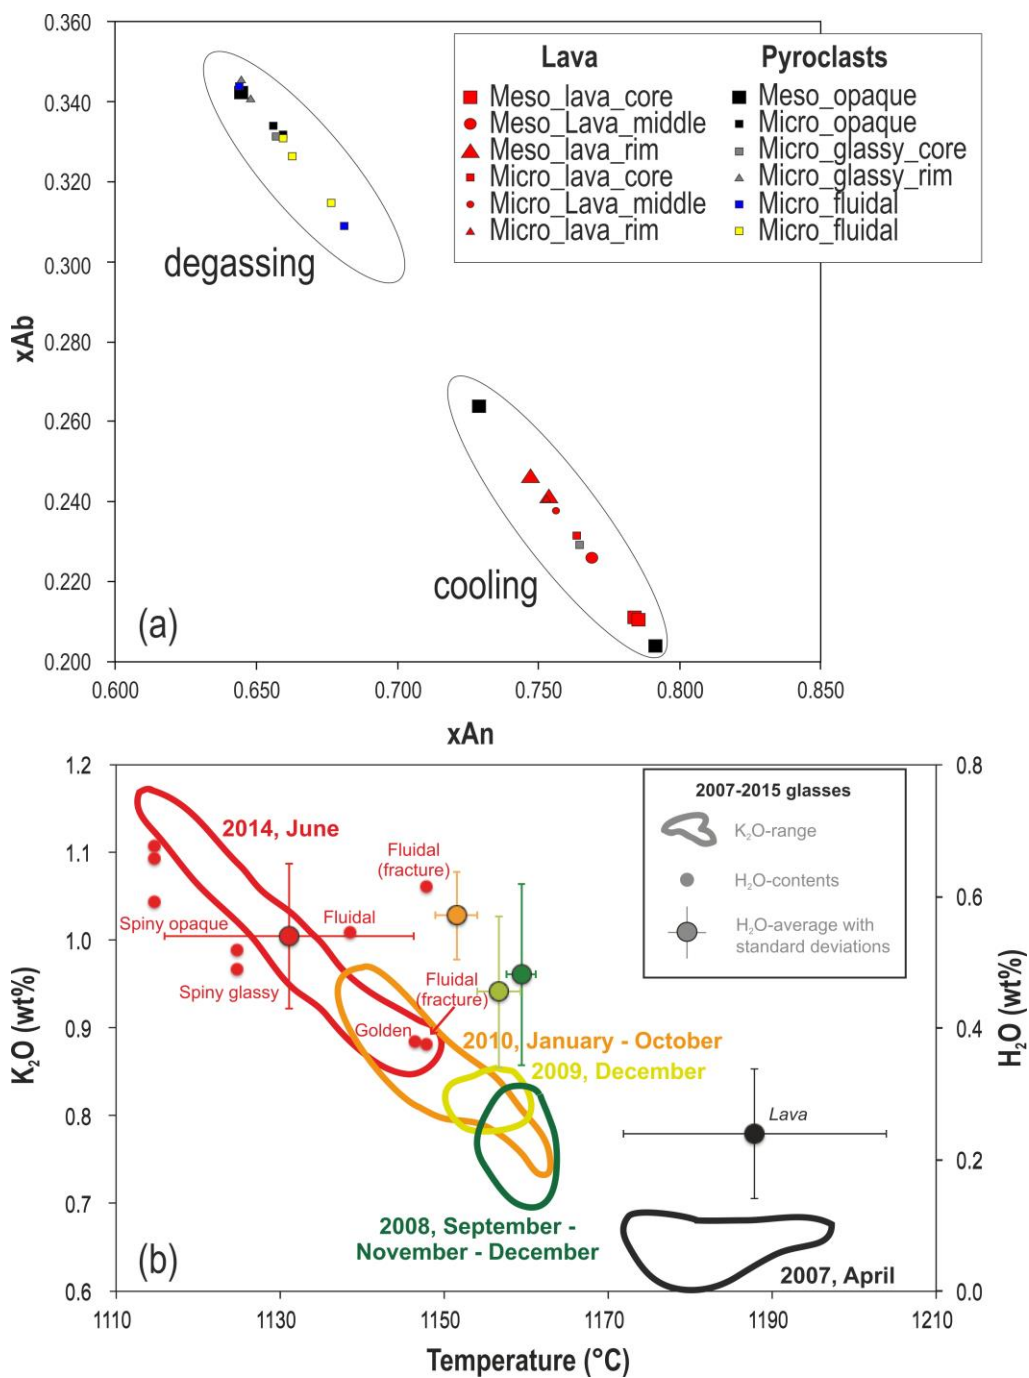

1745

1746 **Figure 10** a) Anorthite versus Albite compositions for the plagioclase crystals measured for  
 1747 [June 2014 eruption of PdF](#); b) Temperature, composition (K<sub>2</sub>O) and dissolved water content  
 1748 (H<sub>2</sub>O) for the evolution of 2007-2014 melts from glasses. [The data have been obtained by](#)

1749 | [studying the glass-plagioclase equilibrium or on the basis of matrix glass analyses.](#)  
1750 | Temperature estimation based on the MgO-thermometer of Helz and Thornber (1987)  
1751 | modified by Putirka (2008). Water content from the plagioclase hygrometer of Lange et al.  
1752 | (2009). Only plagioclases in equilibrium with melts are considered, following the procedure  
1753 | described by Putirka (2008) for >1050°C melts ( $K_d = 0.27 \pm 0.05$ ). [Error bars reported in](#)  
1754 | [Figure 10b correspond to the standard deviation of the plagioclase dataset, whose range is](#)  
1755 | [larger than error of the method. We stress that reported temperatures are obtained using Helz](#)  
1756 | [dry model; further uncertainty arises from the dependence of the method on dissolved water](#)  
1757 | [content as shown recently by Putirka \(2008\); in order to minimize the number of assumptions](#)  
1758 | [and perform a comparison between distinct eruptions, we preferred to adopt the dry model.](#)

1759

1760

1761

1762

1763

1764

1765

1766

1767

1768

1769

1770

1771

1772

1773

1774



1775  
1776  
1777

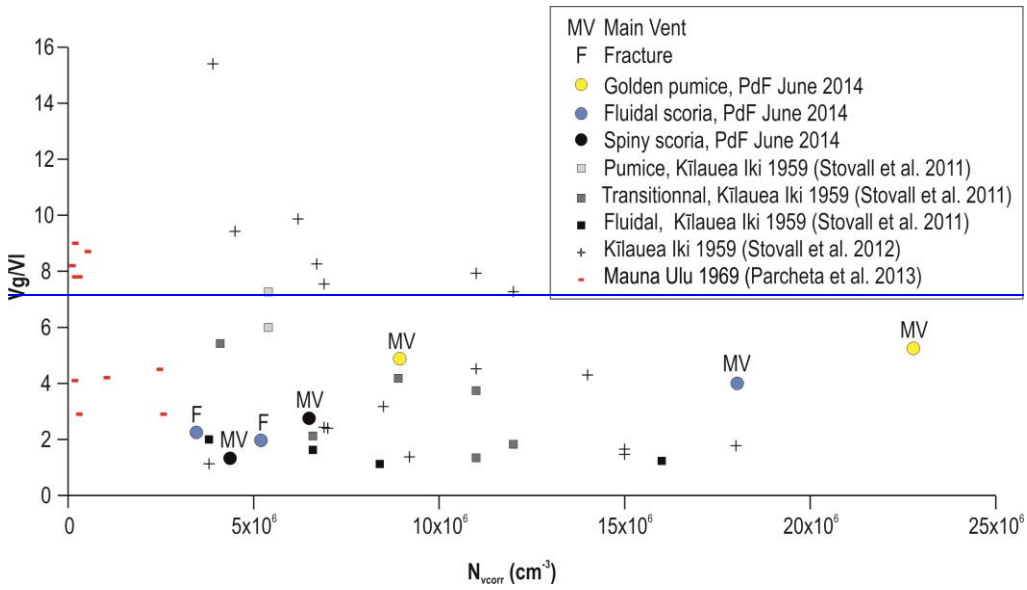

1778  
1779

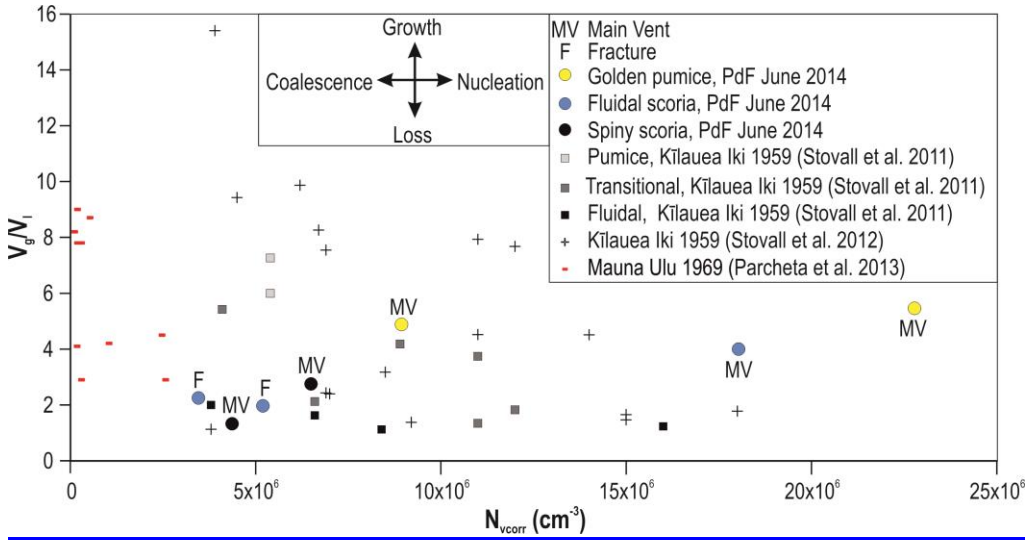

1780

1781 **Figure 11** Volumetric ratio of vesicles to melt ( $V_G/V_L$ ) versus vesicle number density

1782

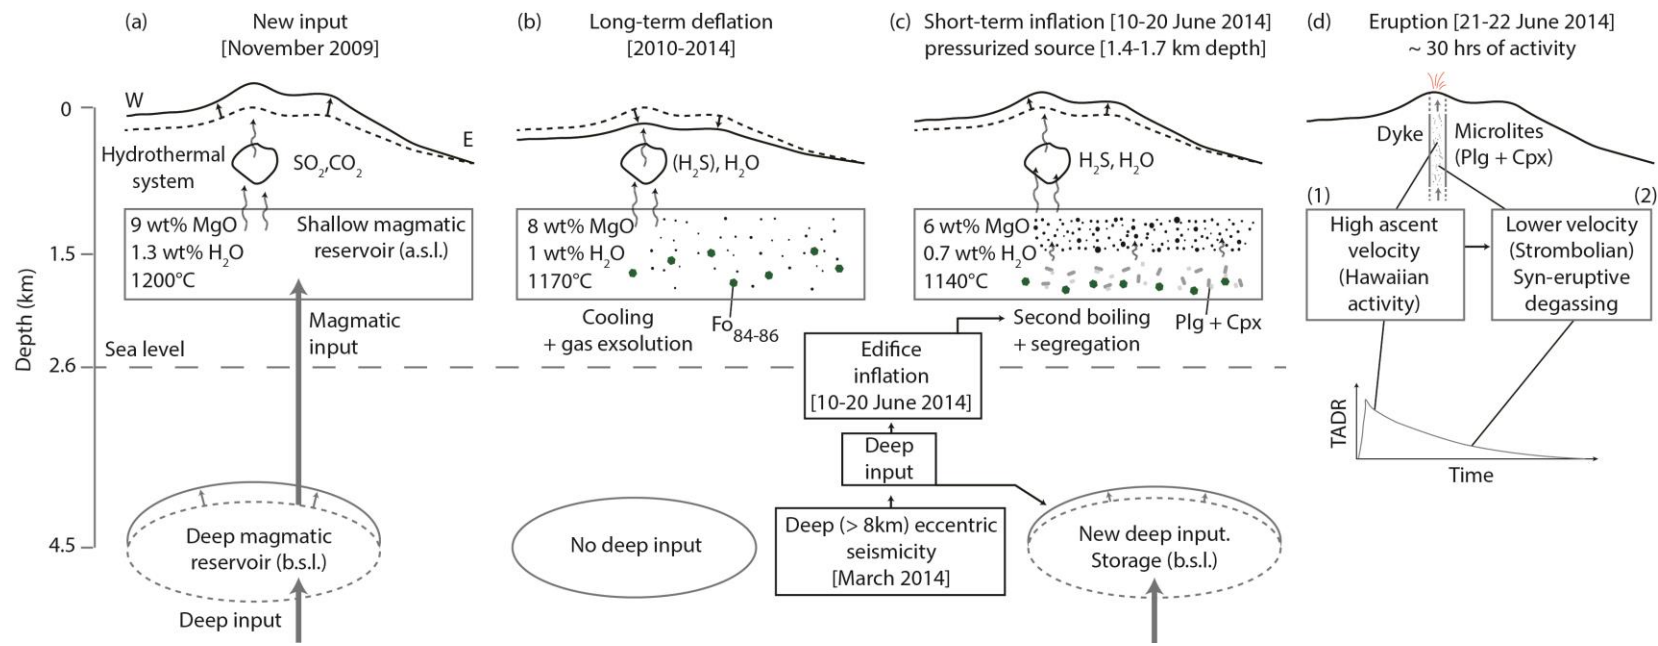

1783

1784 [Figure 12 Schematic model of the evolution of PdF volcanic system from the new deep magmatic input of November 2009 up to June 2014](#)

1785 [eruption. See explanation in the text](#)
